# Supplementary material for: Organocatalytic enantioselective aza-Friedel–Crafts reaction between benzothiazolimines and 2-naphthols for the preparation of chiral 2′-aminobenzothiazolomethyl naphthols
Source: Royal Society of Chemistry journal article supplement (doi:10.1039/d1ob01443a), 2021-01-01

**Organocatalytic Enantioselective aza-Friedel-Crafts Reaction between Benzothiazolimines and 2-Naphthols for Effective Preparation of Chiral 2'-aminobenzothiazolomethyl Naphthols**

Chen-Yi Li,<sup>a,b</sup> Min Xiang,<sup>a,b</sup> Jian Zhang,<sup>a,b</sup> Wen-Sheng Li,<sup>a,b</sup> Ying Zou,<sup>a,b</sup> Fang Tian<sup>a</sup> and Li-Xin

Wang<sup>\*a</sup>

\*E-mail: [wlxioc@cioc.ac.cn](mailto:wlxioc@cioc.ac.cn)

<sup>a</sup> Key Laboratory of Asymmetric Synthesis and Chirotechnology of Sichuan Province, Chengdu Institute of Organic Chemistry, Chinese Academy of Sciences, Chengdu 610041, P.R. China

<sup>b</sup> University of Chinese Academy of Sciences, Beijing 100039, P.R. China

**Table of contents**

|                                                                                           |        |
|-------------------------------------------------------------------------------------------|--------|
| <b>1.</b> General information                                                             | S2     |
| <b>2.</b> General procedure for the Syntheses of reactants <b>1</b>                       | S2     |
| <b>3.</b> General procedure for the synthesis of <b>3</b>                                 | S2     |
| <b>4.</b> Scale-up preparation and representative transformation of product of <b>3aa</b> | S3-4   |
| <b>5.</b> X-ray diffraction parameters and data for <b>3aa</b>                            | S4-5   |
| <b>6.</b> NMR data of products                                                            | S5-15  |
| <b>7.</b> HPLC,NMR spectra of products                                                    | S16-72 |

## 1. General Information

Commercial grade solvent was dried and purified by standard procedures as specified in Purification of Laboratory Chemicals.  $^1\text{H}$  NMR and  $^{13}\text{C}$  NMR spectra were recorded on a Bruker Avance (600 and 300 MHz for  $^1\text{H}$  NMR, 150 and 75 MHz for  $^{13}\text{C}$  NMR) instrument. Data for  $^1\text{H}$  NMR are reported as chemical shift (ppm, tetramethylsilane as the internal standard), integration, multiplicity (s = singlet, d = doublet, t = triplet, q = quartet, m = multiplet), coupling constant (Hz). Data for  $^{13}\text{C}$  NMR are reported as chemical shift. High resolution mass spectra were obtained with Thermo Scientific LTQ Orbitrap XL mass spectrometer. Enantiomeric excess was determined by HPLC on chiralpak AD-H, IC. Optical rotations were measured at 589 nm at 20 °C. Melting points were recorded on a Buchi Melting Point B-545. Flash column chromatography was carried out using silica gel eluting with ethyl acetate and petroleum ether. Reactions were monitored by TLC and visualized with ultraviolet light.

## 2. General Procedure for the Syntheses of Reactants 1

Benzothiazolamines<sup>13</sup> were prepared as reported procedures. Unless otherwise noted, materials were purchased from commercial suppliers and used without further purification.

## 3. General procedure for the synthesis of 3

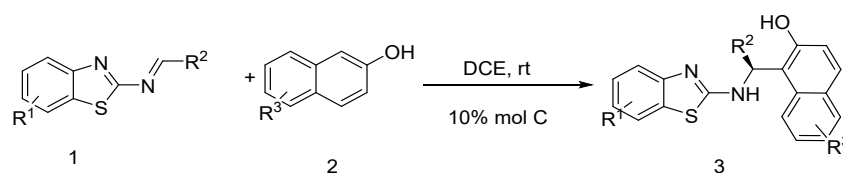

A mixture of 0.1 mmol **1** (23.8 mg), 0.15 mmol **2** (21.6 mg) and 10 mol (8h, Rf = 0.2, PE: EA = 6:1), the solvent was evaporated and the mixture was directly purified by flash column chromatography (petroleum ether/ethyl acetate 8/1 to 6/1) to afford product **3aa** (35.1 mg). Other reactants were operated by the same procedures.

## 4. Scale-up preparation and representative transformation of product 3aa

### 4.1 Scale-up preparation.

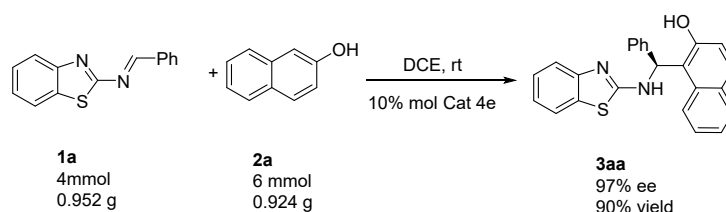

A solution of Benzothiazolimine **1a** (0.952g, 4.0 mmol, 1 equiv.), 2-naphthols **2a** (0.864 g, 6 mmol, 1.5 equiv.), and cat **4e** (10% mol,) in DCE (40 mL, 0.1 M) was stirred at room temperature. After **1a** was consumed monitored by TLC, the solvent was evaporated and the mixture was directly purified by column chromatography on silica gel eluting with petroleum ether/ethyl acetate to afford product **3aa**.

#### 4.2 Diacetylation and methylation of product **3aa**<sup>[5b]</sup>[17][18]

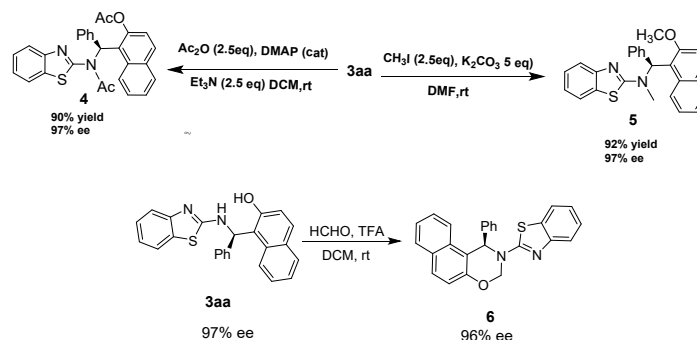

A solution of **3aa** (38.3mg, 0.1 mmol.), Et<sub>3</sub>N (25.2 mg ,0.25 mmol,2.5 eq) and Ac<sub>2</sub>O(25.5 mg ,0.25mmol, 2.5 eq) in DCM (1mL, 0.1 M) was stirred at room temperature. After **3aa** was consumed by TLC, the solvent was evaporated and the mixture was directly purified by column chromatography on silica gel eluting with petroleum ether/ethyl acetate to afford product **4**.

A solution of **3aa** (38.3mg, 0.1mmol,), CH<sub>3</sub>I (35.5 mg, 0.25 mmol, 2.5 equiv.), and K<sub>2</sub>CO<sub>3</sub> (69 mg, 0.5mmol, 5 equiv) in DMF (1mL, 0.1 M) was stirred at 25 °C. After **3aa** was consumed by TLC. the solvent was evaporated and the mixture was directly purified by column chromatography on silica gel eluting with petroleum ether/ethyl acetate to afford product **5**.

A solution of **3aa** (38.3mg, 0.1 mmol.), (HCHO)<sub>n</sub> (25.2 mg ,0.25 mmol,2.5 eq) and TFA (25.5 mg ,0.25mmol, 2.5 eq) in DCM (1mL, 0.1 M) was stirred at room temperature. After **3aa** was consumed by TLC, the solvent was evaporated and the mixture was directly purified by column chromatography on silica gel eluting with petroleum ether/DCM to afford product **6**.

#### references:

- M. Montesinos-Magraner, C. Vila, R. Cantón, G. Blay, I. Fernández, M. C. Muñoz and J. R. Pedro, *RSC Adv.*, 2015, **5**, 60101;
- Q.-J. Ni, X.-X. Song, J.-W. Xiong, G. Raabe, and D. Enders. *Chem. Commun.*, 2015,**51**, 1263-1266.
- J. Alemun, S. Cabrera, E. Maerten, J. Overgaard, K. A. Jørgensen, *Angew. Chem. Int. Ed.*, 2007, **46**, 5520-5523.
- J. C. Wang, Y. Zhou, X. L. Xu, P. Liu, G. B. Dong, *J. Am. Chem. Soc.*, 2020, **142**, 3050-3059.

## 5.X-ray diffraction parameters and data for 3aa

Single crystals of compound **3aa** was obtained by EA/PE at room temperature. The ellipsoid contour was set at 50% probability levels. Details for data collection and structure refinement are summarized in Table S1. CCDC 2055754, contain supplementary crystallographic data for this paper.

**Table S1:** Important crystal data of compound **3a**

|                                             |                                                          |
|---------------------------------------------|----------------------------------------------------------|
| Empirical formula                           | C <sub>24</sub> H <sub>18</sub> N <sub>2</sub> OS        |
| Formula weight                              | 382.46                                                   |
| Temperature/K                               | 293(2)                                                   |
| Crystal system                              | monoclinic                                               |
| Space group                                 | P2 <sub>1</sub>                                          |
| a/Å                                         | 6.8325(3)                                                |
| b/Å                                         | 15.6420(8)                                               |
| c/Å                                         | 8.9374(5)                                                |
| α/°                                         | 90                                                       |
| β/°                                         | 92.861(5)                                                |
| γ/°                                         | 90                                                       |
| Volume/Å <sup>3</sup>                       | 953.99(8)                                                |
| Z                                           | 2                                                        |
| ρ <sub>calc</sub> /cm <sup>3</sup>          | 1.331                                                    |
| μ/mm <sup>-1</sup>                          | 1.633                                                    |
| F(000)                                      | 400.0                                                    |
| Crystal size/mm <sup>3</sup>                | 0.16 × 0.1 × 0.08                                        |
| Radiation                                   | CuKα (λ = 1.54184)                                       |
| 2θ range for data collection/°              | 9.91 to 134.14                                           |
| Index ranges                                | -8 ≤ h ≤ 8, -18 ≤ k ≤ 18, 0 ≤ l ≤ 10                     |
| Reflections collected                       | 3412                                                     |
| Independent reflections                     | 3412 [R <sub>int</sub> = ?, R <sub>sigma</sub> = 0.0538] |
| Data/restraints/parameters                  | 3412/2/226                                               |
| Goodness-of-fit on F <sup>2</sup>           | 1.048                                                    |
| Final R indexes [I>=2σ (I)]                 | R <sub>1</sub> = 0.0566, wR <sub>2</sub> = 0.1347        |
| Final R indexes [all data]                  | R <sub>1</sub> = 0.0676, wR <sub>2</sub> = 0.1433        |
| Largest diff. peak/hole / e Å <sup>-3</sup> | 0.26/-0.24                                               |
| Flack parameter                             | 0.00(2)                                                  |

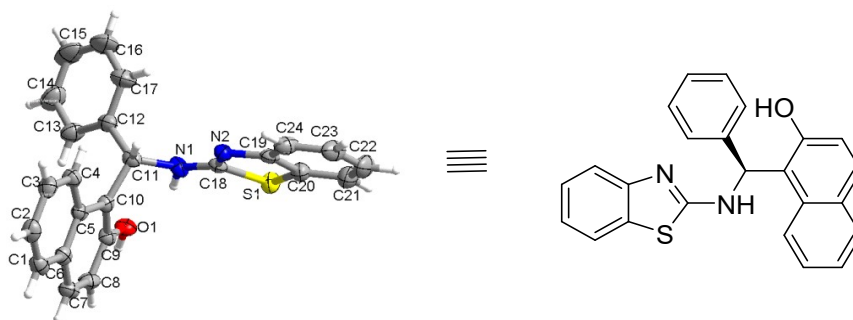

**Figure S1.** ORTEP plot of compound **3aa**  
Thermal ellipsoids are drawn at 50% probability level.

## 6. $^1\text{H}$ and $^{13}\text{C}$ NMR data for all compounds

### (S)-1-((benzo[d]thiazol-2-ylamino)(phenyl)methyl)naphthalen-2-ol (**3aa**)

white solid, mp: 202.7-204.6 °C, 92% yield (35.1 mg), 97% ee,  $[\alpha]_{\text{D}}^{20} = -197.3$  ( $c = 1.0$ , EA); The ee was determined by chiral HPLC (Chiralcel AD-H column, hexane/*i*-PrOH = 80/20, flow rate 1.0 mL/min,  $\lambda = 254$  nm,  $t_{\text{major}} = 8.523$  min,  $t_{\text{minor}} = 12.548$  min).

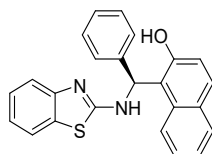

$^1\text{H}$  NMR (300 MHz, DMSO):  $^1\text{H}$  NMR (300 MHz, DMSO)  $\delta$  10.22 (s, 1H), 8.85 (d,  $J = 7.2$  Hz, 1H), 7.88 (s, 1H), 7.81 (dd,  $J = 8.2, 3.5$  Hz, 2H), 7.68 (d,  $J = 7.7$  Hz, 1H), 7.42–7.14 (m, 11H), 7.02 (t,  $J = 7.5$  Hz, 1H).

$^{13}\text{C}$  NMR (75 MHz, DMSO- $d_6$ ):  $\delta$  166.3, 153.2, 152.1, 142.5, 132.2, 130.8, 129.6, 128.7, 128.6, 128.1, 126.2, 126.1, 125.5, 123.9, 122.4, 121.0, 120.9, 118.7, 118.4, 118.1, 53.1.

HRMS (ESI)  $m/z$  calcd for  $\text{C}_{24}\text{H}_{19}\text{N}_2\text{OS}^+$  ( $\text{M}+\text{H}$ ) $^+$  383.1212, found 383.1213.

### (S)-1-((benzo[d]thiazol-2-ylamino)(4-chlorophenyl)methyl)naphthalen-2-ol (**3ba**)

white solid, Mp: 147.8-149.2 °C 95% yield (39.5 mg), 98% ee,  $[\alpha]_{\text{D}}^{20} = -190$  ( $c = 1.0$ , EA); The ee was determined by chiral HPLC (Chiralcel AD-H column, hexane/*i*-PrOH = 80/20, flow rate 1.0 mL/min,  $\lambda = 254$  nm,  $t_{\text{major}} = 7.668$  min,  $t_{\text{minor}} = 9.433$  min).

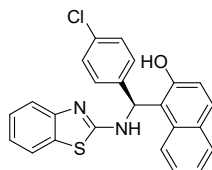

$^1\text{H}$  NMR (300 MHz, DMSO- $d_6$ ):  $^1\text{H}$  NMR (300 MHz, DMSO)  $\delta$  10.21 (s, 1H), 8.81 (s, 1H), 7.81 (dd,  $J$

= 8.2, 4.0 Hz, 3H), 7.67 (d,  $J = 7.6$  Hz, 1H), 7.47–7.12 (m, 10H), 7.02 (t,  $J = 7.4$  Hz, 1H).  
 $^{13}\text{C NMR}$  (75 MHz, DMSO)  $\delta$  166.2, 153.2, 152.1, 141.8, 132.0, 130.9, 130.7, 129.9, 128.7, 128.1, 127.9, 126.4, 125.5, 123.7, 122.6, 121.2, 121.0, 118.3, 118.2, 52.6.  
**HRMS** (ESI)  $m/z$  calcd for  $\text{C}_{24}\text{H}_{18}\text{ClN}_2\text{OS}^+$  ( $\text{M}+\text{H}$ ) $^+$  417.0822, found 417.0823.

**(S)-1-((benzo[d]thiazol-2-ylamino)(4-bromophenyl)methyl)naphthalen-2-ol (3ca)**

white solid, Mp: 141.6-143.4 °C, 95% yield (43.7 mg), 98% ee,  $[\alpha]_{\text{D}}^{20} = -156.3$  ( $c = 1.0$ , EA); The ee was determined by chiral HPLC (Chiralcel AD-H column, hexane/*i*-PrOH = 80/20, flow rate 1.0 mL/min,  $\lambda = 254$  nm,  $t_{\text{major}} = 8.023$  min,  $t_{\text{minor}} = 9.715$  min).

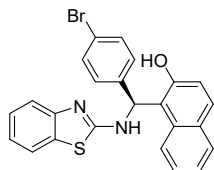

$^1\text{H NMR}$  (300 MHz, DMSO):  $^1\text{H NMR}$  (300 MHz, DMSO)  $\delta$  10.25 (s, 1H), 8.87 (d,  $J = 6.9$  Hz, 1H), 7.82 (d,  $J = 9.0$  Hz, 3H), 7.69 (d,  $J = 7.6$  Hz, 1H), 7.47 (d,  $J = 8.4$  Hz, 2H), 7.41 (d,  $J = 7.8$  Hz, 2H), 7.35–7.26 (m, 3H), 7.25–7.16 (m, 3H), 7.03 (t,  $J = 7.4$  Hz, 1H).  
 $^{13}\text{C NMR}$  (75 MHz, DMSO)  $\delta$  166.2, 153.2, 152.1, 142.2, 132.0, 131.0, 129.8, 128.6, 128.3, 126.4, 125.5, 123.7, 122.5, 121.1, 120.9, 119.2, 118.4, 118.2, 118.2, 52.6.  
**HRMS** (ESI)  $m/z$  calcd for  $\text{C}_{24}\text{H}_{18}\text{BrN}_2\text{OS}^+$  ( $\text{M}+\text{H}$ ) $^+$  461.0317, found 461.03226.

**(S)-1-((benzo[d]thiazol-2-ylamino)(4-(trifluoromethyl)phenyl)methyl)naphthalen-2-ol (3da)**

white solid, Mp: 205.8-207.1 °C, 85 % yield(38.3 mg), 98% ee,  $[\alpha]_{\text{D}}^{20} = -132.5$  ( $c = 1.0$ , EA); The ee was determined by chiral HPLC (Chiralcel AD-H column, hexane/*i*-PrOH = 92/8, flow rate 1.0 mL/min,  $\lambda = 254$  nm,  $t_{\text{major}} = 12.015$  min,  $t_{\text{minor}} = 13.382$  min).

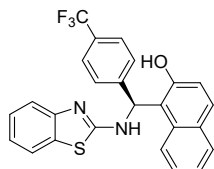

$^1\text{H NMR}$  (600 MHz, DMSO)  $\delta$  10.26 (s, 1H), 8.91 (d,  $J = 7.1$  Hz, 1H), 7.84 (d,  $J = 9.0$  Hz, 3H), 7.70 (d,  $J = 7.7$  Hz, 1H), 7.66 (d,  $J = 8.4$  Hz, 2H), 7.47 (d,  $J = 8.2$  Hz, 2H), 7.41 (d,  $J = 7.9$  Hz, 3H), 7.34–7.18 (m, 3H), 7.07–6.99 (m, 1H).  
 $^{13}\text{C NMR}$  (150MHz, DMSO)  $\delta$  166.6, 153.7, 152.5, 148.2, 132.5, 131.4, 130.9 (d,  $J = 142.4$  Hz), 130.4, 129.1, 127.4, 127.2 (d,  $J = 7.5$  Hz), 126.8, 125.9, 125.7, 125.5, 123.9, 121.6, 121.4, 118.8 (d,  $J = 9.6$  Hz), 118.5, 53.3.

**HRMS** (ESI)  $m/z$  calcd for  $\text{C}_{25}\text{H}_{18}\text{F}_3\text{N}_2\text{OS}^+$  ( $\text{M}+\text{H}$ ) $^+$  451.1086, found 451.1088.

**(S)-1-((benzo[d]thiazol-2-ylamino)(4-fluorophenyl)methyl)naphthalen-2-ol (3ea)**

white solid, Mp: 127.4-129.3 °C, 92 % yield(36.8 mg), 95% ee,  $[\alpha]_{\text{D}}^{20} = -312.6$  ( $c = 1.0$ , EA); The ee was determined by chiral HPLC (Chiralcel AD-H column, hexane/*i*-PrOH = 80/20, flow rate 1.0 mL/min,  $\lambda = 254$  nm,  $t_{\text{major}} = 7.507$  min,  $t_{\text{minor}} = 9.907$  min).

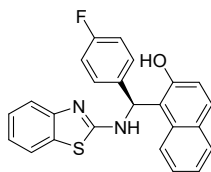

**<sup>1</sup>H NMR** (600 MHz, DMSO) δ 10.22 (s, 1H), 8.86 (d, *J* = 6.3 Hz, 1H), 7.88 (s, 1H), 7.81 (t, *J* = 8.3 Hz, 2H), 7.68 (d, *J* = 7.7 Hz, 1H), 7.39 (t, *J* = 8.2 Hz, 2H), 7.33 (d, *J* = 6.6 Hz, 1H), 7.28 (t, *J* = 11.6 Hz, 4H), 7.21 (t, *J* = 7.6 Hz, 1H), 7.10 (t, *J* = 8.6 Hz, 2H), 7.02 (t, *J* = 7.5 Hz, 1H).

**<sup>13</sup>C NMR** (150MHz, DMSO) δ 166.7, 161.23 (d, *J* = 242.0 Hz), 153.6, 152.5, 139.0, 132.5 131.3, 130.1, 129.0, 128.4 (d, *J* = 7.9 Hz), 126.8, 125.9, 122.9, 121.5, 121.3, 118.9, 118.6, 115.3 (d, *J* = 21.3 Hz), 53.0.

HRMS (ESI) *m/z* calcd for C<sub>24</sub>H<sub>18</sub>FN<sub>2</sub>OS<sup>+</sup> (M+H)<sup>+</sup> 401.1118, found 401.11212.

**(S)-1-((benzo[d]thiazol-2-ylamino)(p-tolyl)methyl)naphthalen-2-ol (3fa)**

White solid, mp: 186.7-188.9 °C, 94% yield ( 37.2 mg ) , 95% ee, [α]<sub>D</sub><sup>20</sup> = -290.6 (*c* = 1.0, EA); The ee was determined by chiral HPLC (Chiralcel AD-H column, hexane/*i*-PrOH = 80/20, flow rate 1.0 mL/min, λ =254 nm, *t*<sub>major</sub> =8.140 min, *t*<sub>minor</sub> = 11.540 min).

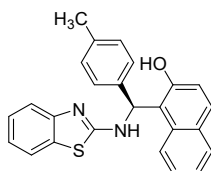

**<sup>1</sup>H NMR** (600 MHz, DMSO) δ 10.18 (s, 1H), 8.82 (d, *J* = 6.0 Hz, 1H), 8.03 – 7.82 (m, 1H), 7.79 (t, *J* = 9.1 Hz, 2H), 7.67 (d, *J* = 7.6 Hz, 1H), 7.27 (m, 8H), 7.09 – 6.98 (m, 3H), 2.22 (s, 3H).

**<sup>13</sup>C NMR** (150 MHz, DMSO) δ 166.8, 153.6, 152.6, 139.9, 135.6, 132.6, 131.2, 129.9, 129.1, 129.0, 126.5, 125.9, 122.8, 121.4, 121.3, 119.3, 118.9, 118.5, 53.4, 18.5.

HRMS (ESI) *m/z* calcd for C<sub>25</sub>H<sub>21</sub>N<sub>2</sub>OS<sup>+</sup> (M+H)<sup>+</sup> 397.1369, found 397.1370.

**(S)-1-((benzo[d]thiazol-2-ylamino)(4-methoxyphenyl)methyl)naphthalen-2-ol (3ga)**

white solid, Mp: 178.2-180.3 °C, 98 % yield(40.3 mg), 85% ee, [α]<sub>D</sub><sup>20</sup> = -346.3 (*c* = 1.0, EA); The ee was determined by chiral HPLC (Chiralcel AD-H column, hexane/*i*-PrOH = 80/20, flow rate 1.0 mL/min, λ =254 nm, *t*<sub>major</sub> = 12.073 min, *t*<sub>minor</sub> = 23.790 min).

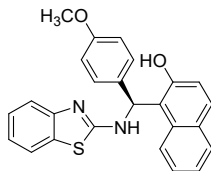

**<sup>1</sup>H NMR** (300 MHz, DMSO):δ 10.19 (s, 1H), 8.82 (d, *J* = 7.0 Hz, 1H), 7.90 (s, 1H), 7.82–7.75 (m, 2H), 7.67 (d, *J* = 7.7 Hz, 1H), 7.38 (d, *J* = 7.9 Hz, 2H), 7.32–7.13 (m, 6H), 7.01 (t, *J* = 7.6 Hz, 1H), 6.84 (d, *J* = 8.7 Hz, 2H), 3.68 (s, 3H).

**<sup>13</sup>C NMR** (75 MHz, DMSO) δ 166.3, 157.7, 153.1, 152.2, 134.2 132.1, 130.7, 129.5, 128.7, 128.6, 127.3, 126.2, 125.5, 123.9, 122.4, 121.0, 120.9, 118.8, 118.4, 118.1, 113.5, 55.0, 52.8.

HRMS (ESI) *m/z* calcd for C<sub>25</sub>H<sub>21</sub>N<sub>2</sub>O<sub>2</sub>S<sup>+</sup> (M+H)<sup>+</sup> 413.1318, found 413.1318.

**(S)-1-((benzo[d]thiazol-2-ylamino)(3-bromophenyl)methyl)naphthalen-2-ol (3ha)**

white solid, Mp: 199.2-200.1 °C, 96 % yield ( 44.1 mg ) , 98% ee,  $[\alpha]_D^{20} = -191.5$  ( $c = 1.0$ , EA); The ee was determined by chiral HPLC (Chiralcel AD-H column, hexane/*i*-PrOH = 80/20, flow rate 1.0 mL/min,  $\lambda = 254$  nm,  $t_{\text{major}} = 7.607$  min,  $t_{\text{minor}} = 8.757$  min).

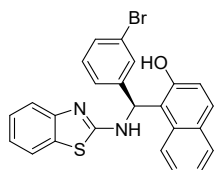

**<sup>1</sup>H NMR** (600 MHz, DMSO)  $\delta$  10.25 (s, 1H), 8.88 (d,  $J = 7.4$  Hz, 1H), 7.88 (d,  $J = 36.7$  Hz, 1H), 7.83 (t,  $J = 7.7$  Hz, 2H), 7.69 (d,  $J = 7.7$  Hz, 1H), 7.47–7.34 (m, 5H), 7.29 (dd,  $J = 8.0, 4.9$  Hz, 2H), 7.26–7.20 (m, 3H), 7.07–7.00 (m, 1H).

**<sup>13</sup>C NMR** (150 MHz, DMSO)  $\delta$  166.6, 153.7, 152.4, 146.1, 132.5, 131.3, 130.8, 130.3, 129.5, 129.1, 129.0, 127.0, 125.9, 125.7, 123.0, 122.0, 121.6, 121.4, 118.8, 118.7, 118.5, 53.1.

**HRMS** (ESI)  $m/z$  calcd for  $C_{24}H_{18}BrN_2OS^+$  ( $M+H$ )<sup>+</sup> 461.0317, found 461.0323.

**(S)-1-((benzo[d]thiazol-2-ylamino)(3-chlorophenyl)methyl)naphthalen-2-ol (3ia)**

white solid, Mp: 183.8-184.9 °C, 92 % yield(38.2 mg), 93% ee,  $[\alpha]_D^{20} = -170.5$  ( $c = 1.0$ , EA); The ee was determined by chiral HPLC (Chiralcel AD-H column, hexane/*i*-PrOH = 80/20, flow rate 1.0 mL/min,  $\lambda = 254$  nm,  $t_{\text{major}} = 6.300$  min,  $t_{\text{minor}} = 7.225$  min).

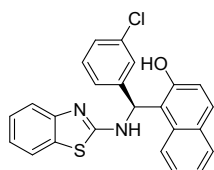

**<sup>1</sup>H NMR** (600 MHz, DMSO)  $\delta$  10.25 (s, 1H), 8.90 (t,  $J = 22.9$  Hz, 1H), 7.92 (t,  $J = 45.5$  Hz, 1H), 7.85–7.80 (m, 2H), 7.69 (d,  $J = 7.6$  Hz, 1H), 7.41 (d,  $J = 7.9$  Hz, 2H), 7.36 (d,  $J = 7.3$  Hz, 1H), 7.32 – 7.19 (m, 7H), 7.06–7.01 (m, 1H).

**<sup>13</sup>C NMR** (150 MHz, DMSO)  $\delta$  166.6, 153.7, 152.4, 145.9, 133.3, 132.5, 131.3, 130.5, 130.3, 129.1, 129.0, 127.0, 126.6, 126.2, 125.9, 125.3, 123.0, 121.6, 121.4, 118.8, 118.7, 118.5, 53.1,

**HRMS** (ESI)  $m/z$  calcd for  $C_{24}H_{18}ClN_2OS^+$  ( $M+H$ )<sup>+</sup> 417.0822, found 417.0822.

**(S)-1-((benzo[d]thiazol-2-ylamino)(3-methoxyphenyl)methyl)naphthalen-2-ol (3ja)**

white solid, Mp: 189.1-190.9 °C, 95% yield(39.1 mg) ,95% ee,  $[\alpha]_D^{20} = -160.5$  ( $c = 1.0$ , EA); The ee was determined by chiral HPLC (Chiralcel AD-H column, hexane/*i*-PrOH = 80/20, flow rate 1.0 mL/min,  $\lambda = 254$  nm,  $t_{\text{major}} = 9.632$  min,  $t_{\text{minor}} = 13.282$  min).

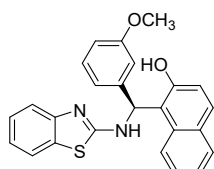

**<sup>1</sup>H NMR** (300 MHz, DMSO): $\delta$  10.22 (s, 1H), 8.86 (d,  $J = 7.6$  Hz, 1H), 7.91 (s, 1H), 7.81 (dd,  $J = 8.4, 4.0$  Hz, 2H), 7.69 (d,  $J = 7.8$  Hz, 1H), 7.47–7.09 (m, 7H), 7.02 (t,  $J = 7.5$  Hz, 1H), 6.91–6.82 (m, 2H), 6.76 (d,  $J = 6.5$  Hz, 1H), 3.65 (s, 3H).



**<sup>13</sup>C NMR** (75 MHz, DMSO)  $\delta$  166.3, 159.2, 153.2, 152.1, 144.3, 132.2, 130.8, 129.6, 129.3, 128.6, 128.6, 126.3, 125.5, 123.9, 122.5, 121.0, 120.9, 118.7, 118.5, 118.1, 54.9, 53.0.

**HRMS** (ESI)  $m/z$  calcd for  $C_{25}H_{21}N_2O_2S^+$  (M+H)<sup>+</sup> 413.1318, found 413.1319.

**(S)-1-((benzo[d]thiazol-2-ylamino)(naphthalen-2-yl)methyl)naphthalen-2-ol (3ka)**

white solid, Mp: 197.8-199.8 °C, 80% yield (34.5 mg), 97% ee,  $[\alpha]_D^{20} = -138.2$  ( $c = 1.0$ , EA); The ee was determined by chiral HPLC (Chiralcel AD-H column, hexane/*i*-PrOH = 80/20, flow rate 1.0 mL/min,  $\lambda = 254$  nm, 97% ee:  $t_{major} = 9.273$  min,  $t_{minor} = 12.590$  min).

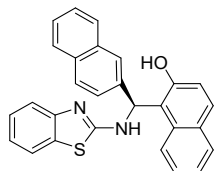

**<sup>1</sup>H NMR** (300 MHz, DMSO)  $\delta$  10.26 (s, 1H), 8.97 (d,  $J = 7.1$  Hz, 1H), 7.99 (s, 1H), 7.87 – 7.67 (m, 6H), 7.59–7.43 (m, 2H), 7.39 (m, 6H), 7.29–7.17 (m, 2H), 7.03 (t,  $J = 7.6$  Hz, 1H).

**<sup>13</sup>C NMR** (75 MHz, DMSO)  $\delta$  166.3, 153.5, 152.4, 147.3, 132.5, 131.2, 130.3, 129.0, 127.1, 126.8, 125.9, 125.0, 124.5, 122.9, 121.6, 121.4, 118.8, 118.7, 118.5, 50.8.

**HRMS** (ESI)  $m/z$  calcd for  $C_{28}H_{21}N_2OS^+$  (M+H)<sup>+</sup> 433.1369, found 433.1370.

**(R)-1-((benzo[d]thiazol-2-ylamino)(thiophen-2-yl)methyl)naphthalen-2-ol (3la)**

white solid, Mp: 197.8-199.8 °C, 92% yield (35.6 mg), 91% ee,  $[\alpha]_D^{20} = -165.5$  ( $c = 1.0$ , EA); The ee was determined by chiral HPLC (Chiralcel AD-H column, hexane/*i*-PrOH = 80/20, flow rate 1.0 mL/min,  $\lambda = 254$  nm, 97% ee:  $t_{major} = 10.607$  min,  $t_{minor} = 17.658$  min).

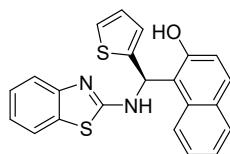

**<sup>1</sup>H NMR** (600 MHz, DMSO)  $\delta$  10.30 (s, 1H), 8.99 (s, 1H), 8.03 (s, 1H), 7.81 (t,  $J = 8.6$  Hz, 2H), 7.68 (d,  $J = 7.7$  Hz, 1H), 7.52 (d,  $J = 7.5$  Hz, 1H), 7.42 (d,  $J = 8.0$  Hz, 2H), 7.33 (d,  $J = 5.0$  Hz, 1H), 7.30 – 7.17 (m, 3H), 7.02 (t,  $J = 7.5$  Hz, 1H), 6.95–6.76 (m, 2H).

**<sup>13</sup>C NMR** (150 MHz, DMSO)  $\delta$  166.3, 153.5, 152.4, 147.3, 132.5, 131.2, 130.3, 129.0, 127.1, 126.8, 125.9, 125.0, 124.5, 122.9, 121.6, 121.4, 118.8, 118.7, 118.5, 50.8.

**HRMS** (ESI)  $m/z$  calcd for  $C_{22}H_{17}N_2OS_2^+$  (M+H)<sup>+</sup> 389.0776, found 389.0775.

**(R)-1-((benzo[d]thiazol-2-ylamino)(furan-2-yl)methyl)naphthalen-2-ol (3ma)**

white solid, Mp: 180.1-181.5 °C, 90% yield (33.4 mg), 95% ee,  $[\alpha]_D^{20} = +84.4$  ( $c = 1.0$ , EA); The ee was determined by chiral HPLC (Chiralcel AD-H column, hexane/*i*-PrOH = 80/20, flow rate 1.0 mL/min,  $\lambda = 254$  nm, 97% ee:  $t_{major} = 10.710$  min,  $t_{minor} = 13.930$  min).

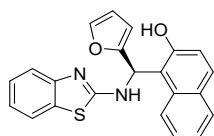

**<sup>1</sup>H NMR** (300 MHz, DMSO)  $\delta$  10.24 (s, 1H), 8.90 (d,  $J = 7.5$  Hz, 1H), 8.08 (d,  $J = 8.6$  Hz, 1H), 7.85 – 7.72 (m, 2H), 7.66 (d,  $J = 7.5$  Hz, 1H), 7.51 (s, 1H), 7.40 (d,  $J = 7.7$  Hz, 2H), 7.27 (dd,  $J = 12.3, 8.1$  Hz, 4H), 7.01 (t,  $J = 7.1$  Hz, 1H), 6.38 (s, 1H), 6.22 (s, 1H).

<sup>13</sup>C NMR (75 MHz, DMSO) δ 165.8, 154.5, 153.4, 151.9, 141.8, 132.4, 130.6, 129.8, 128.5, 126.2, 125.5, 123.3, 122.4, 121.0, 120.9, 118.4, 118.1, 116.1, 110.5, 106.4, 48.7.

HRMS (ESI) m/z calcd for C<sub>22</sub>H<sub>16</sub>N<sub>2</sub>O<sub>2</sub>S<sub>2</sub><sup>+</sup> (M+H)<sup>+</sup> 373.1005, found 373.1024.

### 1-((benzo[d]thiazol-2-ylamino)(2-methoxyphenyl)methyl)naphthalen-2-ol (3na)

white solid, Mp: 178.5-179.6 °C, 85% yield (37.9 mg), >99% ee, [α]<sub>D</sub><sup>20</sup> = -180.5 (c = 1.0, EA); The ee was determined by chiral HPLC (Chiralcel AD-H column, hexane/*i*-PrOH = 80/20, flow rate 1.0 mL/min, λ = 254 nm, *t*<sub>major</sub> = 8.723 min, *t*<sub>minor</sub> = 20.923 min).

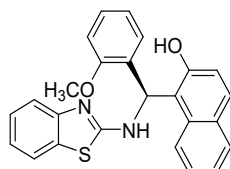

<sup>1</sup>H NMR (600 MHz, DMSO) δ 9.91 (s, 1H), 8.64 (d, *J* = 7.8 Hz, 1H), 8.22 (d, *J* = 8.6 Hz, 1H), 7.76 (d, *J* = 7.9 Hz, 1H), 7.71 (d, *J* = 8.8 Hz, 1H), 7.62 (d, *J* = 7.6 Hz, 1H), 7.51 (d, *J* = 6.1 Hz, 1H), 7.41 (t, *J* = 7.2 Hz, 1H), 7.34–7.13 (m, 6H), 6.99–6.85 (m, 3H), 3.58 (s, 3H).

<sup>13</sup>C NMR (75 MHz, DMSO) δ 166.4, 153.3, 152.1, 140.2, 132.8, 132.2, 131.8, 130.8, 129.7, 128.7, 128.6, 127.7, 127.6, 126.3, 126.1, 125.4, 125.0, 123.9, 121.0, 120.9, 118.6, 118.6, 118.5, 53.3.

HRMS (ESI) m/z calcd for C<sub>25</sub>H<sub>21</sub>N<sub>2</sub>O<sub>2</sub>S<sup>+</sup> (M+H)<sup>+</sup> 413.1318, found 413.1317.

### (S)-1-((benzo[d]thiazol-2-ylamino)(2,4-dichlorophenyl)methyl)naphthalen-2-ol (3oa)

white solid, Mp: 192.5-193.6 °C, 65% yield (29.3 mg), 90% ee, [α]<sub>D</sub><sup>20</sup> = -199.4 (c = 1.0, EA); The ee was determined by chiral HPLC (Chiralcel AD-H column, hexane/*i*-PrOH = 90/10, flow rate 1.0 mL/min, λ = 254 nm, *t*<sub>major</sub> = 7.607 min, *t*<sub>minor</sub> = 13.740 min).

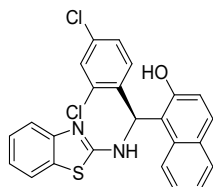

<sup>1</sup>H NMR (600 MHz, DMSO) δ 9.97 (s, 1H), 8.90 (d, *J* = 6.9 Hz, 1H), 8.03 (d, *J* = 8.4 Hz, 1H), 7.80 (dd, *J* = 18.5, 8.5 Hz, 2H), 7.67 (dd, *J* = 12.5, 8.2 Hz, 2H), 7.50 (d, *J* = 1.7 Hz, 1H), 7.46–7.32 (m, 3H), 7.27 (t, *J* = 7.4 Hz, 1H), 7.21–7.10 (m, 3H), 7.01 (t, *J* = 7.6 Hz, 1H).

<sup>13</sup>C NMR (151 MHz, DMSO) δ 165.6, 154.2, 152.6, 139.5, 133.4, 133.1, 132.2, 131.5, 131.2, 130.4, 129.1, 128.7, 127.0, 125.9, 122.8, 121.5, 121.4, 119.0, 118.8, 116.3, 52.8.

HRMS (ESI) m/z calcd for C<sub>24</sub>H<sub>17</sub>Cl<sub>2</sub>N<sub>2</sub>OS<sup>+</sup> (M+H)<sup>+</sup> 451.0433, found 451.0435.

### (S)-1-(1-(benzo[d]thiazol-2-ylamino)propyl)naphthalen-2-ol (3pa)

white solid, Mp: 109.7-110.4 °C, 50% yield (16.7 mg), 45% ee, [α]<sub>D</sub><sup>20</sup> = -199.4 (c = 1.0, EA); The ee was determined by chiral HPLC (Chiralcel AD-H column, hexane/*i*-PrOH = 80/20, flow rate 1.0 mL/min, λ = 254 nm, *t*<sub>major</sub> = 5.657 min, *t*<sub>minor</sub> = 8.082 min).

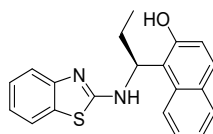

**<sup>1</sup>H NMR** (300 MHz, DMSO) δ 10.05 (s, 1H), 8.51 (d, *J* = 7.8 Hz, 1H), 8.16 (d, *J* = 8.6 Hz, 1H), 7.74 (dd, *J* = 16.5, 8.3 Hz, 2H), 7.61 (d, *J* = 7.7 Hz, 1H), 7.38 (dd, *J* = 14.3, 7.4 Hz, 2H), 7.22 (dt, *J* = 16.0, 7.4 Hz, 3H), 6.96 (t, *J* = 7.4 Hz, 1H), 6.45 (d, *J* = 7.5 Hz, 1H), 5.49 (s, 1H), 2.33–1.84 (m, 2H), 0.88 (t, *J* = 7.5 Hz, 3H).

**<sup>13</sup>C NMR** (75 MHz, DMSO) δ 166.2, 153.3, 152.1, 132.9, 132.7, 130.4, 129.1, 128.5, 128.4, 125.8, 125.4, 125.2, 123.7, 122.3, 120.8, 120.7, 118.4, 117.8, 117.2, 56.0, 20.6, 14.4, 14.0.

**HRMS** (ESI) *m/z* calcd for C<sub>24</sub>H<sub>17</sub>Cl<sub>2</sub>N<sub>2</sub>OS<sup>+</sup> (M+H)<sup>+</sup> 335.1212, found 335.1075.

**(S)-1-(((4-methylbenzo[d]thiazol-2-yl)amino)(phenyl)methyl)naphthalen-2-ol (3qa)**

white solid, Mp:198.3-199.9 °C, 92% yield(36.4 mg), 96% ee, [α]<sub>D</sub><sup>20</sup> = -360.2 (*c* = 1.0, EA); The ee was determined by chiral HPLC (Chiralcel AD-H column, hexane/*i*-PrOH = 80/20, flow rate 1.0 mL/min, λ = 254 nm, *t*<sub>major</sub> = 5.292 min, *t*<sub>minor</sub> = 4.693 min).

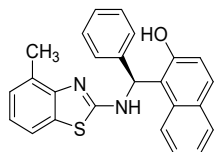

**<sup>1</sup>H NMR** (600 MHz, DMSO) δ 10.17 (s, 1H), 8.90 (d, *J* = 5.3 Hz, 1H), 8.17–7.92 (m, 1H), 7.78 (d, *J* = 8.9 Hz, 2H), 7.47 (d, *J* = 7.7 Hz, 1H), 7.38 (d, *J* = 1.2 Hz, 2H), 7.29 (dt, *J* = 19.5, 6.0 Hz, 6H), 7.18 (t, *J* = 7.2 Hz, 1H), 7.02 (d, *J* = 7.4 Hz, 1H), 6.90 (t, *J* = 7.6 Hz, 1H), 2.43 (s, 3H).

**<sup>13</sup>C NMR** (150 MHz, DMSO-d<sub>6</sub>) δ 166.0, 155.7, 153.8, 151.3, 142.6, 132.8, 130.5, 129.9, 129.7, 128.9, 128.5, 128.0, 127.6, 126.7, 126.6, 126.4, 123.1, 122.8, 121.3, 119.5, 119.0, 118.7, 53.7.

**HRMS** (ESI) *m/z* calcd for C<sub>25</sub>H<sub>21</sub>N<sub>2</sub>OS<sup>+</sup> (M+H)<sup>+</sup> 397.1369, found 397.1371.

**(S)-1-(((5-chlorobenzo[d]thiazol-2-yl)amino)(phenyl)methyl)naphthalen-2-ol (3ra)**

white solid, Mp:182.4-184.5 °C, 88% yield(36.5 mg), 97% ee, [α]<sub>D</sub><sup>20</sup> = -254.5 (*c* = 1.0, EA); The ee was determined by chiral HPLC (Chiralcel AD-H column, hexane/*i*-PrOH = 80/20, flow rate 1.0 mL/min, λ = 254 nm, *t*<sub>major</sub> = 8.832min, *t*<sub>minor</sub> = 10.665 min).

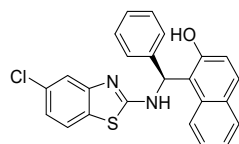

**<sup>1</sup>H NMR** (600 MHz, DMSO) δ 10.17 (s, 1H), 8.90 (d, *J* = 5.3 Hz, 1H), 8.17–7.92 (m, 1H), 7.78 (d, *J* = 8.9 Hz, 2H), 7.47 (d, *J* = 7.7 Hz, 1H), 7.38 (d, *J* = 1.2 Hz, 2H), 7.29 (m, 6.0 Hz, 6H), 7.18 (t, *J* = 7.2 Hz, 1H), 7.02 (d, *J* = 7.4 Hz, 1H), 6.90 (t, *J* = 7.6 Hz, 1H), 2.43 (s, 3H).

**<sup>13</sup>C NMR** (150 MHz, DMSO-d<sub>6</sub>) δ 166.0, 155.7, 153.8, 151.3, 142.6, 132.8, 130.5, 129.9, 129.7, 128.9, 128.5, 128.0, 127.6, 126.7, 126.6, 126.4, 123.1, 122.8, 121.3, 119.5, 119.0, 118.7, 53.7.

**HRMS** (ESI) *m/z* calcd for C<sub>24</sub>H<sub>18</sub>ClN<sub>2</sub>OS<sup>+</sup> (M+H)<sup>+</sup> 417.0821, found 417.0827.

**(S)-1-(((6-methoxybenzo[d]thiazol-2-yl)amino)(phenyl)methyl)naphthalen-2-ol (3sa)**

white solid, Mp: 172.3-174.6 °C, 90% yield(37.1 mg), 72% ee, [α]<sub>D</sub><sup>20</sup> = -340.5 (*c* = 1.0, EA); The ee was determined by chiral HPLC (Chiralcel AD-H column, hexane/*i*-PrOH = 80/20, flow rate 1.0 mL/min, λ = 254 nm, *t*<sub>major</sub> = 15.365 min, *t*<sub>minor</sub> = 24.298 min).

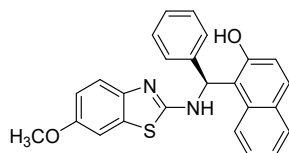

**<sup>1</sup>H NMR** (600 MHz, DMSO)  $\delta$  10.17 (s, 1H), 8.62 (d,  $J$  = 6.9 Hz, 1H), 7.85 (d,  $J$  = 25.3 Hz, 1H), 7.79 (t,  $J$  = 9.4 Hz, 2H), 7.29 (m, 10H), 7.16 (t,  $J$  = 6.6 Hz, 1H), 6.81 (dd,  $J$  = 8.7, 2.5 Hz, 1H), 3.72 (s, 3H).

**<sup>13</sup>C NMR** (150 MHz, DMSO)  $\delta$  165.2, 154.8, 153.6, 146.6, 143.1, 132.3, 129.9, 129.0, 128.5, 126.5, 126.5, 122.8, 119.4, 118.9, 113.3, 105.9, 56.0, 53.4.

**HRMS** (ESI)  $m/z$  calcd for  $C_{25}H_{21}N_2O_2S^+$  (M+H)<sup>+</sup> 413.1318, found 413.1317.

**(S)-1-(((6-bromobenzo[d]thiazol-2-yl)amino)(phenyl)methyl)naphthalen-2-ol (3ta)**

white solid, Mp: 193.6-194.5°C, 90% yield(41.3 mg), 98% ee,  $[\alpha]_D^{20}$  = -274.5 ( $c$  = 1.0, EA); The ee was determined by chiral HPLC (Chiralcel AD-H column, hexane/*i*-PrOH = 80/20, flow rate 1.0 mL/min,  $\lambda$  =254 nm,  $t_{major}$  = 11.990 min,  $t_{minor}$  = 21.9408 min).

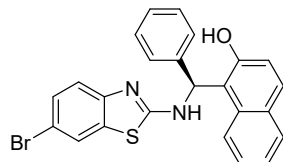

**<sup>1</sup>H NMR** (600 MHz, DMSO)  $\delta$  10.17 (s, 1H), 8.62 (d,  $J$  = 6.9 Hz, 1H), 7.85 (d,  $J$  = 25.3 Hz, 1H), 7.79 (t,  $J$  = 9.4 Hz, 2H), 7.29 (m, 10H), 7.16 (t,  $J$  = 6.6 Hz, 1H), 6.81 (dd,  $J$  = 8.7, 2.5 Hz, 1H), 3.72 (s, 3H).

**<sup>13</sup>C NMR** (150 MHz, DMSO)  $\delta$  165.2, 154.8, 153.6, 146.6, 143.1, 132.3, 129.9, 129.0, 128.5, 126.5, 126.5, 122.8, 119.4, 118.9, 113.3, 105.9, 56.0, 53.4.

**HRMS** (ESI)  $m/z$  calcd for  $C_{25}H_{21}N_2O_2S^+$  (M+H)<sup>+</sup> 463.0317, found 463.0298.

**(S)-1-(((6-chlorobenzo[d]thiazol-2-yl)amino)(phenyl)methyl)naphthalen-2-ol (3ua)**

white solid, Mp: 202.5-204.3 °C, 90 % yield(37.4 mg), 96% ee,  $[\alpha]_D^{20}$  = -240.5 ( $c$  = 1.0, EA); The ee was determined by chiral HPLC (Chiralcel AD-H column, hexane/*i*-PrOH = 80/20, flow rate 1.0 mL/min,  $\lambda$  =254 nm,  $t_{major}$  = 10.598 min,  $t_{minor}$  = 20.440 min).

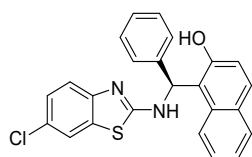

**<sup>1</sup>H NMR** (600 MHz, DMSO)  $\delta$  10.18 (s, 1H), 8.96 (d,  $J$  = 7.5 Hz, 1H), 7.89 (m, 1H), 7.81 (dd,  $J$  = 9.3, 5.4 Hz, 3H), 7.37 (d,  $J$  = 8.6 Hz, 3H), 7.31 – 7.24 (m, 6H), 7.22 (dd,  $J$  = 8.6, 2.2 Hz, 1H), 7.17 (dt,  $J$  = 8.4, 4.0 Hz, 1H).

**<sup>13</sup>C NMR** (150 MHz, DMSO)  $\delta$  167.3, 153.6, 151.5, 142.8, 133.0, 132.6, 130.1, 129.0, 128.6, 126.7, 126.5, 126.0, 125.1, 122.9, 121.0, 119.4, 118.9, 118.8, 53.6.

**HRMS** (ESI)  $m/z$  calcd for  $C_{24}H_{18}ClN_2OS^+$  (M+H)<sup>+</sup> 417.0822, found 417.0823.

**(S)-1-(((benzo[d]thiazol-2-yl)amino)(phenyl)methyl)-7-methoxynaphthalen-2-ol (3ab)**

white solid, Mp: 190.1-192.3 °C, 85% yield(35.1 mg), 95% ee,  $[\alpha]_D^{20}$  = -370.3 ( $c$  = 1.0, EA); The ee was determined by chiral HPLC (Chiralcel AD-H column, hexane/*i*-PrOH = 90/10, flow rate 1.0 mL/min,  $\lambda$  =254 nm,  $t_{major}$  = 17.933 min,  $t_{minor}$  = 22.342 min).

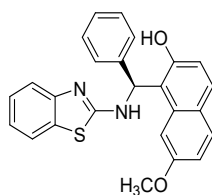

**<sup>1</sup>H NMR** (300 MHz, DMSO)  $\delta$  10.15 (s, 1H), 8.86 (d,  $J$  = 7.3 Hz, 1H), 7.70 (dd,  $J$  = 7.7, 4.0 Hz, 3H), 7.40 (d,  $J$  = 7.5 Hz, 2H), 7.36–7.25 (m, 4H), 7.24–7.09 (m, 4H), 7.03 (t,  $J$  = 7.5 Hz, 1H), 6.91 (d,  $J$  = 7.0 Hz, 1H), 3.65 (s, 3H).

**<sup>13</sup>C NMR** (75MHz, DMSO)  $\delta$  166.7, 154.1, 152.5, 143.2, 131.2, 130.4, 129.7, 129.5, 128.5, 126.4, 126.3, 125.9, 124.4, 121.4, 121.3, 118.6, 118.5, 116.1, 114.7, 108.5, 104.9, 55.5, 55.2, 53.3.

**HRMS** (ESI)  $m/z$  calcd for  $C_{25}H_{21}N_2O_2S^+$  (M+H)<sup>+</sup> 413.1318, found 413.1317.

**(S)-1-((benzo[d]thiazol-2-ylamino)(phenyl)methyl)-7-bromonaphthalen-2-ol (3ac)**

white solid, Mp: 204.1-206.2 °C, 94% yield(43.2 mg),90% ee,  $[\alpha]_D^{20}$  = -335.5( $c$  = 1.0, EA); The ee was determined by chiral HPLC (Chiralcel AD-H column, hexane/*i*-PrOH = 90/10, flow rate 1.0 mL/min,  $\lambda$  =254 nm,  $t_{major}$  = 11.148 min,  $t_{minor}$  = 12.232 min).

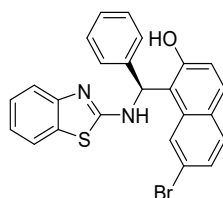

**<sup>1</sup>H NMR** (300 MHz, DMSO)  $\delta$  10.15 (s, 1H), 8.86 (d,  $J$  = 7.3 Hz, 1H), 7.70 (dd,  $J$  = 7.7, 4.0 Hz, 3H), 7.40 (d,  $J$  = 7.5 Hz, 2H), 7.36–7.25 (m, 4H), 7.24–7.09 (m, 4H), 7.03 (t,  $J$  = 7.5 Hz, 1H), 6.91 (d,  $J$  = 7.0 Hz, 1H), 3.65 (s, 3H).

**<sup>13</sup>C NMR** (75MHz, DMSO)  $\delta$  166.7, 154.1, 152.5, 143.2, 131.2, 130.4, 129.7, 129.5, 128.5, 126.4, 126.3, 125.9, 124.4, 121.4, 121.3, 118.6, 118.5, 116.1, 114.7, 108.5, 104.9, 55.5, 55.2, 53.3.

**HRMS** (ESI)  $m/z$  calcd for  $C_{24}H_{18}BrN_2OS^+$  (M+H)<sup>+</sup> 463.0317, found 463.0299.

**(S)-1-((benzo[d]thiazol-2-ylamino)(phenyl)methyl)-6-methoxynaphthalen-2-ol (3ad)**

white solid, Mp: 191.3-192.5°C, 90% yield (37.1mg), 98% ee,  $[\alpha]_D^{20}$  = -264.8( $c$  = 1.0, EA); The ee was determined by chiral HPLC (Chiralcel AD-H column, hexane/*i*-PrOH = 80/20, flow rate 1.0 mL/min,  $\lambda$  =254 nm,  $t_{major}$  = 14.390 min,  $t_{minor}$  =13.190 min).

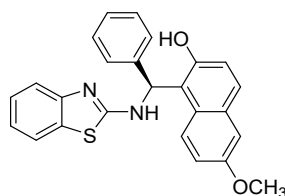

**<sup>1</sup>H NMR** (600 MHz, DMSO)  $\delta$  10.37 (s, 1H), 8.83 (d,  $J$  = 7.3 Hz, 1H), 8.09 (d,  $J$  = 2.1 Hz, 1H), 7.74 (m, 3H), 7.46 (d,  $J$  = 8.1 Hz, 1H), 7.37 (d,  $J$  = 7.9 Hz, 1H), 7.34 – 7.16 (m, 8H), 7.06 – 6.95 (m, 1H).

**<sup>13</sup>C NMR** (150 MHz, DMSO)  $\delta$  166.6, 154.1, 152.5, 142.6, 131.2, 130.6, 129.3, 128.6, 126.7, 126.5, 125.9, 121.5, 121.3, 120.0, 119.5, 118.6, 115.7, 53.3.

**HRMS** (ESI)  $m/z$  calcd for  $C_{25}H_{21}N_2O_2S^+$  (M+H)<sup>+</sup> 413.1318, found 413.1311.

**(S)-1-((benzo[d]thiazol-2-ylamino)(phenyl)methyl)-6-bromonaphthalen-2-ol (3ae)**

white solid, Mp: 197.8-198.9 °C, 92 % yield (42.3 mg), 92% ee ,  $[\alpha]_D^{20} = -216.7$  ( $c = 1.0$ , EA); The ee was determined by chiral HPLC (Chiralcel AD-H column, hexane/*i*-PrOH = 80/20, flow rate 1.0 mL/min,  $\lambda = 254$  nm,  $t_{\text{major}} = 10.432$  min,  $t_{\text{minor}} = 8.365$  min).

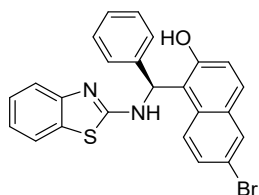

$^1\text{H NMR}$  (600 MHz, DMSO)  $\delta$  10.37 (s, 1H), 8.83 (d,  $J = 7.3$  Hz, 1H), 8.09 (d,  $J = 2.1$  Hz, 1H), 7.74 (m, 3H), 7.46 (d,  $J = 8.1$  Hz, 1H), 7.37 (d,  $J = 7.9$  Hz, 1H), 7.34–7.16 (m, 8H), 7.06–6.95 (m, 1H).

$^{13}\text{C NMR}$  (150 MHz, DMSO)  $\delta$  166.6, 154.1, 152.5, 142.6, 131.2, 130.6, 129.3, 128.6, 126.7, 126.5, 125.9, 121.5, 121.3, 120.0, 119.5, 118.6, 115.7, 53.3.

**HRMS** (ESI)  $m/z$  calcd for  $\text{C}_{24}\text{H}_{18}\text{BrN}_2\text{OS}^+$  ( $\text{M}+\text{H}$ ) $^+$  463.0317, found 463.0323.

**(S)-1-((benzo[d]thiazol-2-ylamino)(phenyl)methyl)naphthalen-2-yl acetate (4)**

white solid, Mp: 180.1-181.5 °C, 90% yield (41.9 mg), 97% ee ,  $[\alpha]_D^{20} = -364.6$  ( $c = 1.0$ , EA); The ee was determined by chiral HPLC (Chiralcel AD-H column, hexane/*i*-PrOH = 80/20, flow rate 1.0 mL/min,  $\lambda = 254$  nm,  $t_{\text{major}} = 8.198$  min,  $t_{\text{minor}} = 8.965$  min).

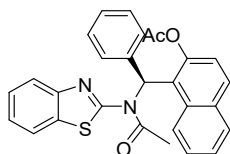

$^1\text{H NMR}$  (300 MHz, DMSO)  $\delta$  7.98 (d,  $J = 9.7$  Hz, 2H), 7.91 (d,  $J = 8.1$  Hz, 2H), 7.80 (d,  $J = 8.1$  Hz, 1H), 7.57 (d,  $J = 8.3$  Hz, 1H), 7.44 (t,  $J = 7.7$  Hz, 3H), 7.40–7.18 (m, 7H), 2.04 (s, 3H), 1.75 (s, 3H).

$^{13}\text{C NMR}$  (75 MHz, DMSO)  $\delta$  169.8, 168.3, 160.9, 148.8, 148.6, 139.8, 135.8, 132.5, 131.5, 130.9, 128.8, 128.4, 126.6, 126.3, 125.9, 125.8, 125.3, 123.7, 123.0, 122.6, 122.0, 55.7, 22.6, 20.1.

**HRMS** (ESI)  $m/z$  calcd for  $\text{C}_{28}\text{H}_{22}\text{BrN}_2\text{OS}^+$  ( $\text{M}+\text{H}$ ) $^+$  467.1423, found 467.1427.

**(S)-N-((2-methoxynaphthalen-1-yl)(phenyl)methyl)benzo[d]thiazol-2-amine (5)**

white solid, Mp: 145.6-147.1 °C, 92 % yield (37.7 mg), 97% ee ,  $[\alpha]_D^{20} = -212.5$  ( $c = 1.0$ , EA); The ee was determined by chiral HPLC (Chiralcel IC column, hexane/*i*-PrOH = 97/3, flow rate 1.0 mL/min,  $\lambda = 254$  nm,  $t_{\text{major}} = 5.330$  min,  $t_{\text{minor}} = 4.785$  min).

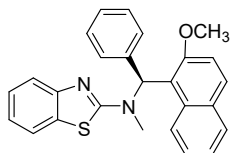

$^1\text{H NMR}$  (300 MHz, DMSO)  $\delta$  8.39–8.25 (m, 1H), 7.87 (d,  $J = 9.0$  Hz, 1H), 7.81–7.71 (m, 1H), 7.55 (d,  $J = 9.1$  Hz, 1H), 7.43 (t,  $J = 6.1$  Hz, 3H), 7.22 (m, 6H), 7.03 (d,  $J = 8.0$  Hz, 1H), 6.93 (s, 1H), 6.40 (s, 1H), 4.11 (s, 3H), 3.50 (s, 3H).

$^{13}\text{C NMR}$  (75 MHz, DMSO)  $\delta$  155.1, 154.8, 144.2, 140.5, 131.3, 129.6, 129.5, 128.1, 128.0, 126.8, 126.4, 126.1, 126.0, 125.2, 123.0, 122.1, 121.6, 120.8, 113.5, 109.1, 60.6, 57.1, 30.1.

**HRMS** (ESI)  $m/z$  calcd for  $\text{C}_{26}\text{H}_{22}\text{BrN}_2\text{OS}^+$  410.1453, found 410.1396

**(S)-2-(benzo[d]thiazol-2-yl)-1-phenyl-2,3-dihydro-1H-naphtho[1,2-e][1,3]oxazine (6)**

white solid, Mp: 98.5-99.6 °C, 65 % yield 25.6 mg), 96% ee ,  $[\alpha]_D^{20} = +284.4$  ( $c = 1.0$ , EA); The ee was determined by chiral HPLC (Chiralcel AD-H column, hexane/*i*-PrOH = 80/20, flow rate 1.0 mL/min,  $\lambda = 254$  nm,  $t_{\text{major}} = 6.773$ min,  $t_{\text{minor}} = 7.332$  min).

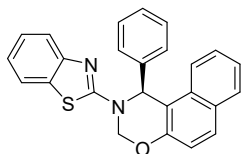

**<sup>1</sup>H NMR** (300 MHz, DMSO)  $\delta$  8.39–8.25 (m, 1H), 7.87 (d,  $J = 9.0$  Hz, 1H), 7.81–7.71 (m, 1H), 7.55 (d,  $J = 9.1$  Hz, 1H), 7.43 (t,  $J = 6.1$  Hz, 3H), 7.22 (m, 6H), 7.03 (d,  $J = 8.0$  Hz, 1H), 6.93 (s, 1H), 6.40 (s, 1H), 4.11 (s, 3H), 3.50 (s, 3H).

**<sup>13</sup>C NMR** (75 MHz, DMSO)  $\delta$  155.1, 154.8, 144.2, 140.5, 131.3, 129.6, 129.5, 128.1, 128.0, 126.8, 126.4, 126.1, 126.0, 125.2, 123.0, 122.1, 121.6, 120.8, 113.5, 109.1, 60.6, 57.1, 30.1.

**HRMS** (ESI)  $m/z$  calcd for  $C_{25}H_{18}N_2OS^+$  ( $M+H$ )<sup>+</sup> 395.1212, found 395.1215

7 .HPLC,NMR spectra of products

**3aa**

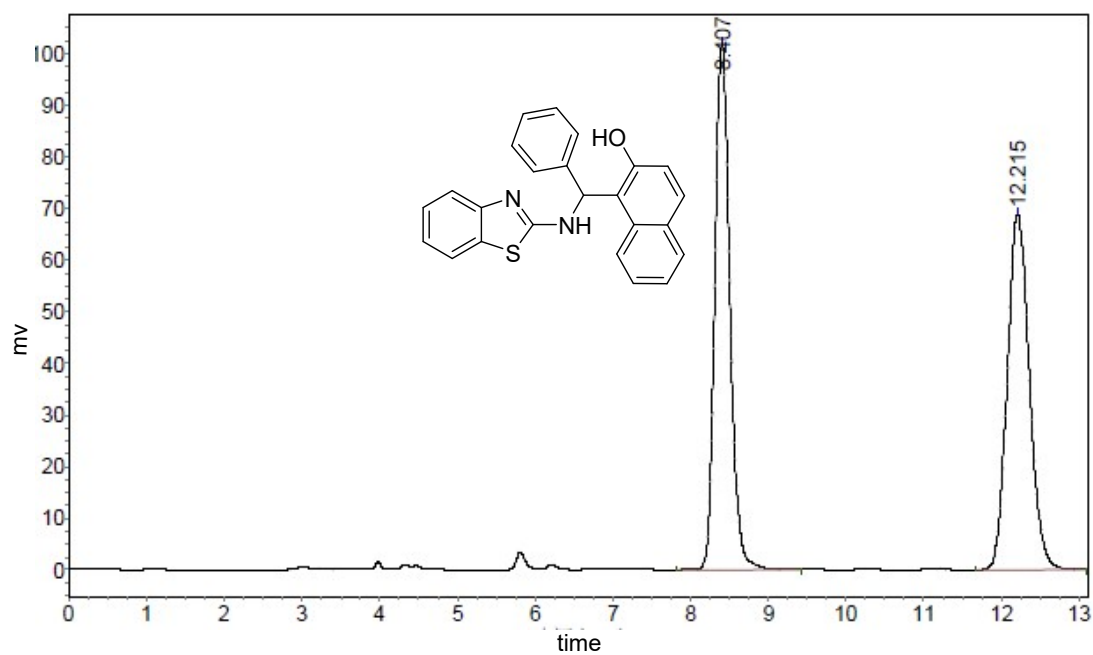

| Peak# | Ret. Time (min) | Height (mV*sec) | Area (mv)   | Area (%) |
|-------|-----------------|-----------------|-------------|----------|
| 1     | 8.407           | 102369.242      | 1373413.000 | 50.0903  |
| 2     | 12.215          | 69116.086       | 1368461.625 | 49.9097  |

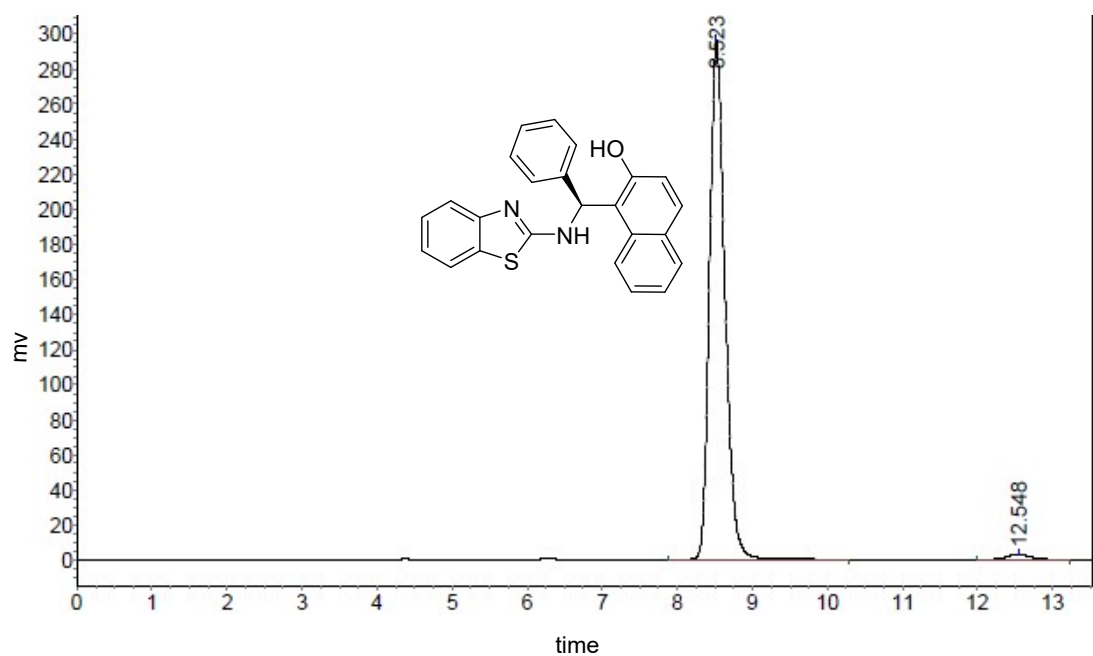

| Peak# | Ret. Time (min) | Height (mV*sec) | Area (mv)   | Area (%) |
|-------|-----------------|-----------------|-------------|----------|
| 1     | 8.523           | 296055.219      | 4250956.000 | 98.3939  |
| 2     | 12.548          | 3272.000        | 69391.203   | 1.6061   |



3ba

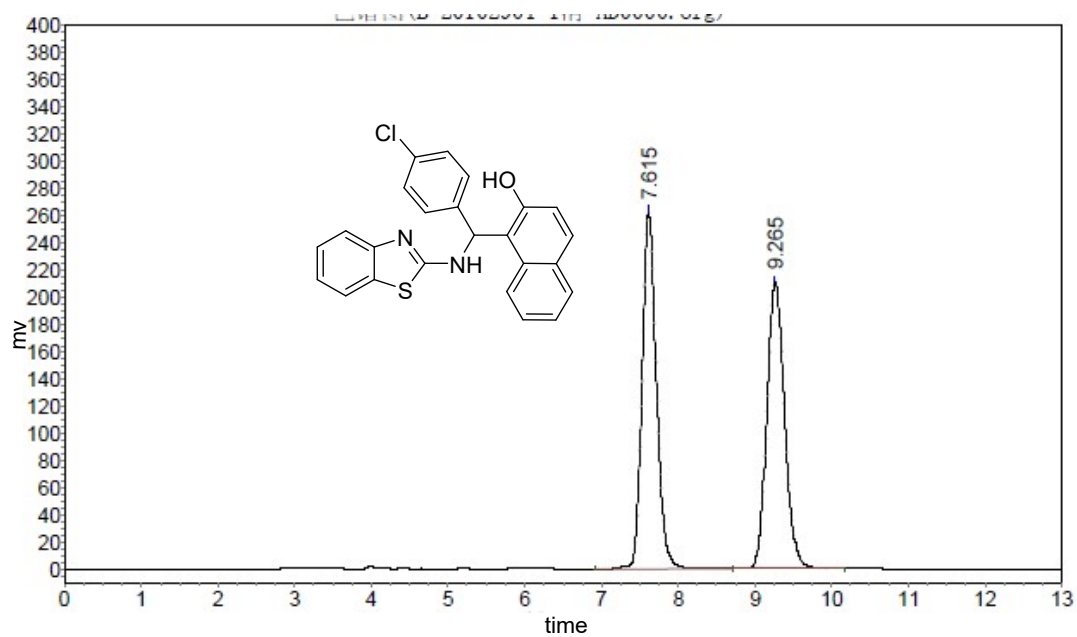

| Peak# | Ret. Time (min) | Height (mV*sec) | Area (mv)   | Area (%) |
|-------|-----------------|-----------------|-------------|----------|
| 1     | 7.615           | 262926.219      | 3443677.500 | 50.1661  |
| 2     | 9.265           | 211300.453      | 3420868.750 | 49.8339  |

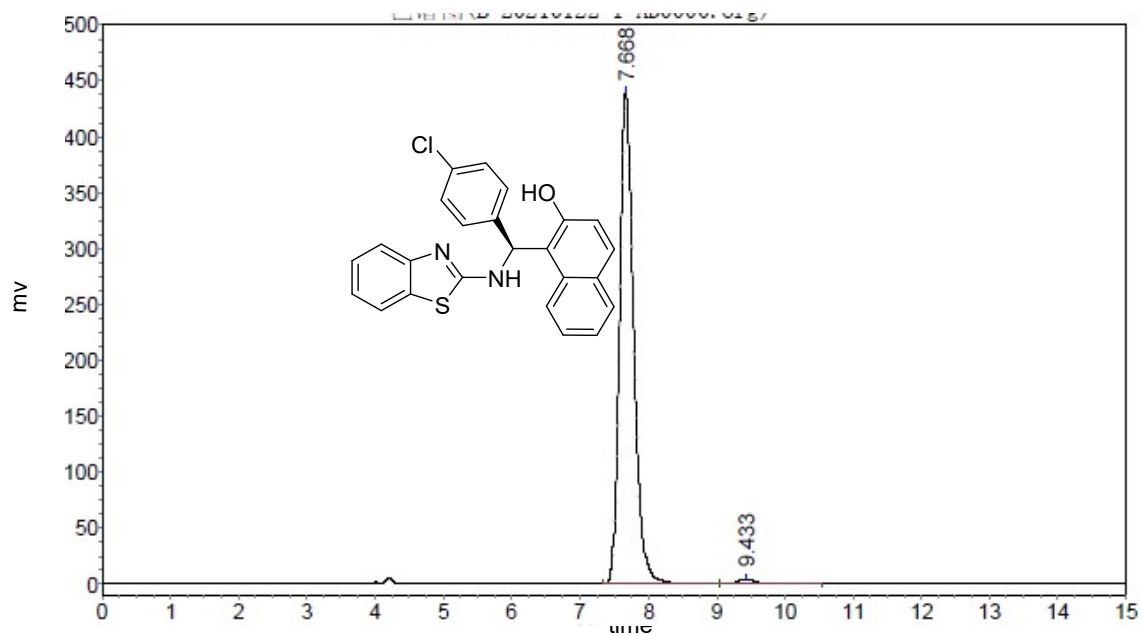

| Peak# | Ret. Time (min) | Height (mV*sec) | Area (mv)   | Area (%) |
|-------|-----------------|-----------------|-------------|----------|
| 1     | 7.668           | 438940.656      | 6319465.000 | 98.9073  |
| 2     | 9.433           | 3776.414        | 69812.758   | 1.0927   |

3ca

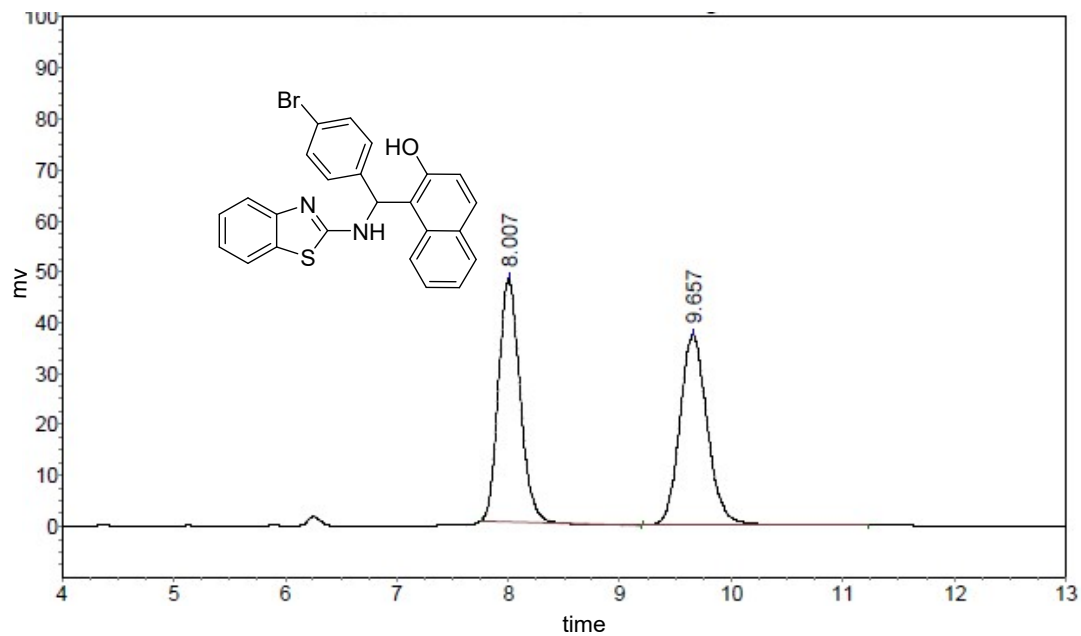

| Peak# | Ret. Time (min) | Height (mV*sec) | Area (mv)  | Area (%) |
|-------|-----------------|-----------------|------------|----------|
| 1     | 8.007           | 47803.188       | 637159.813 | 49.6793  |
| 2     | 9.657           | 37356.355       | 645384.875 | 50.3207  |

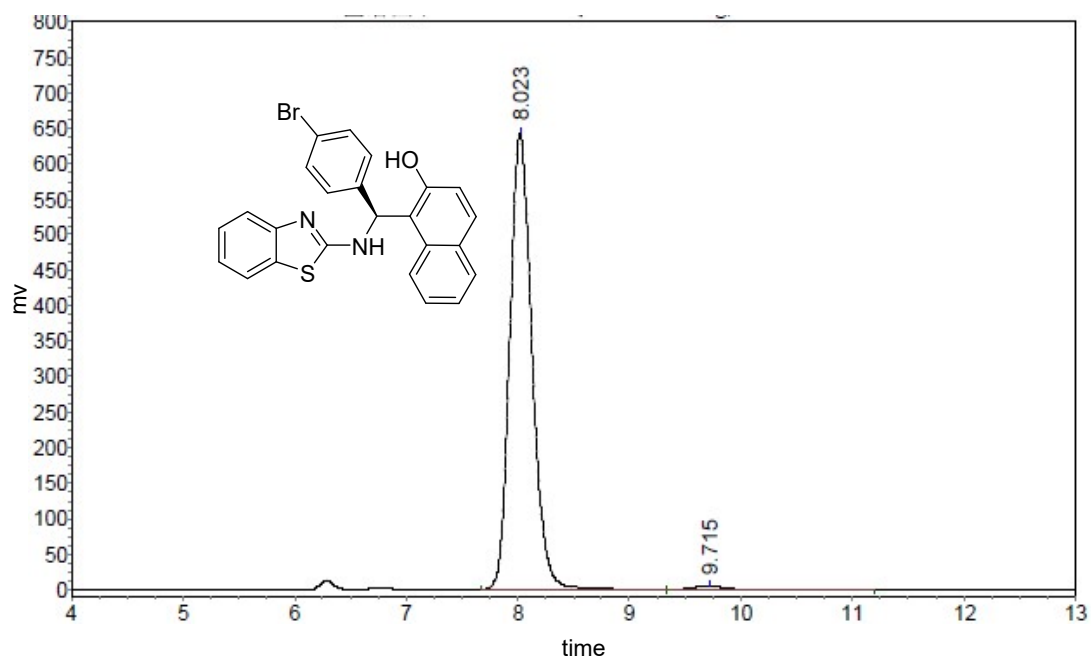

| Peak# | Ret. Time (min) | Height (mV*sec) | Area (mv) | Area (%) |
|-------|-----------------|-----------------|-----------|----------|
|-------|-----------------|-----------------|-----------|----------|

|   |       |            |             |         |
|---|-------|------------|-------------|---------|
| 1 | 8.023 | 642294.875 | 8880231.000 | 99.1121 |
| 2 | 9.715 | 4185.954   | 79551.961   | 0.8879  |

3da

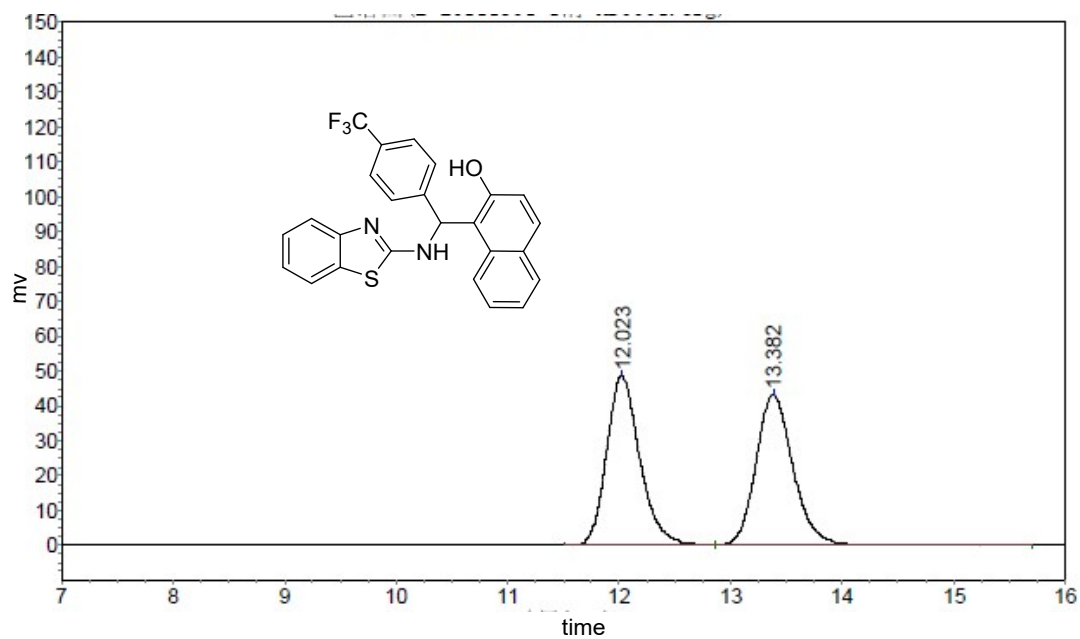

| Peak# | Ret. Time (min) | Height (mV*sec) | Area (mv)   | Area (%) |
|-------|-----------------|-----------------|-------------|----------|
| 1     | 12.023          | 48367.000       | 1002415.125 | 50.1978  |
| 2     | 13.382          | 43077.063       | 994513.938  | 49.8022  |

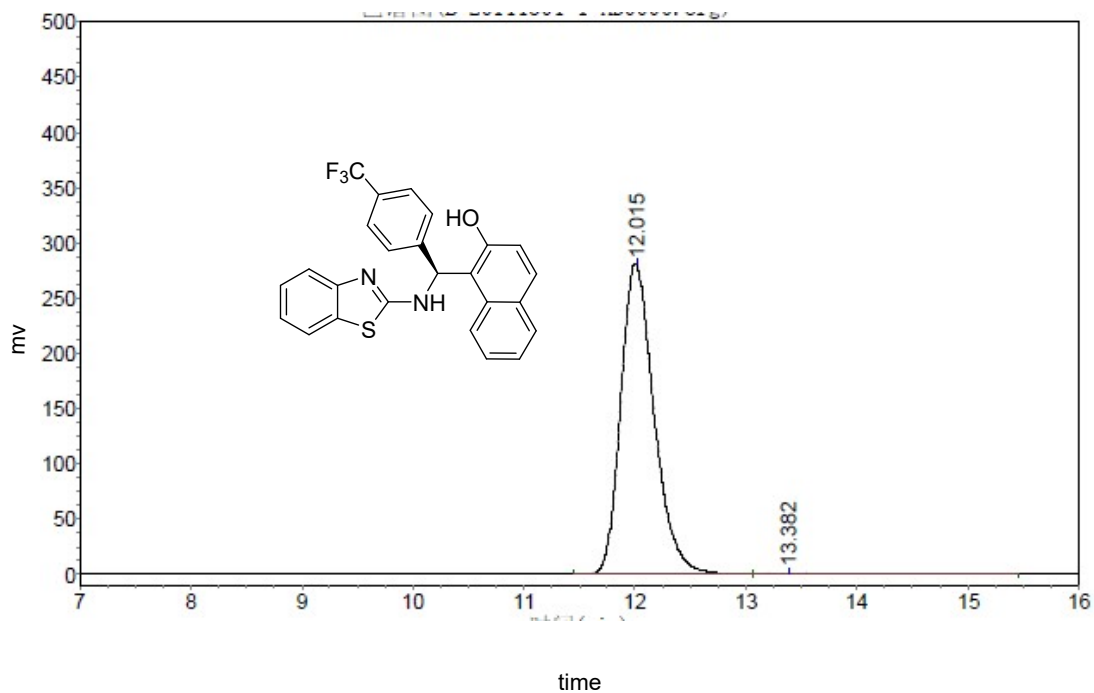

| Peak# | Ret. Time (min) | Height (mV*sec) | Area (mv)   | Area (%) |
|-------|-----------------|-----------------|-------------|----------|
| 1     | 12.015          | 281270.188      | 5888700.500 | 99.2370  |
| 2     | 13.382          | 1444.781        | 45273.535   | 0.7630   |

3ea

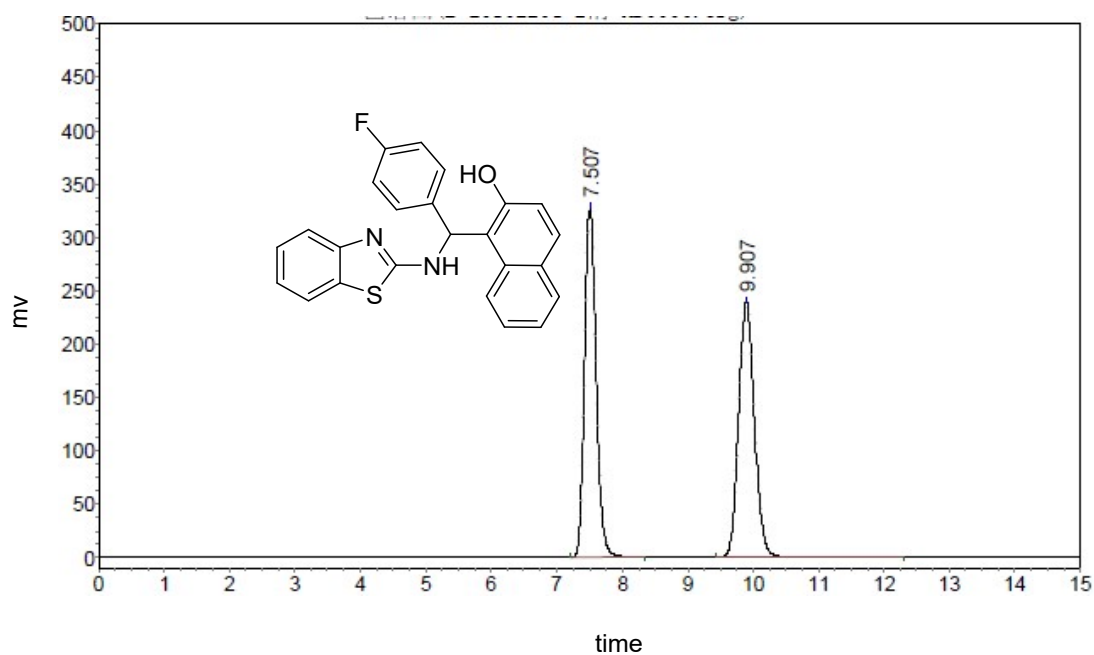

| Peak# | Ret. Time (min) | Height (mV*sec) | Area (mv) | Area (%) |
|-------|-----------------|-----------------|-----------|----------|
|-------|-----------------|-----------------|-----------|----------|

|   |       |            |             |         |
|---|-------|------------|-------------|---------|
| 1 | 7.507 | 326965.844 | 4021054.250 | 49.9278 |
| 2 | 9.907 | 240057.219 | 4032676.000 | 50.0722 |

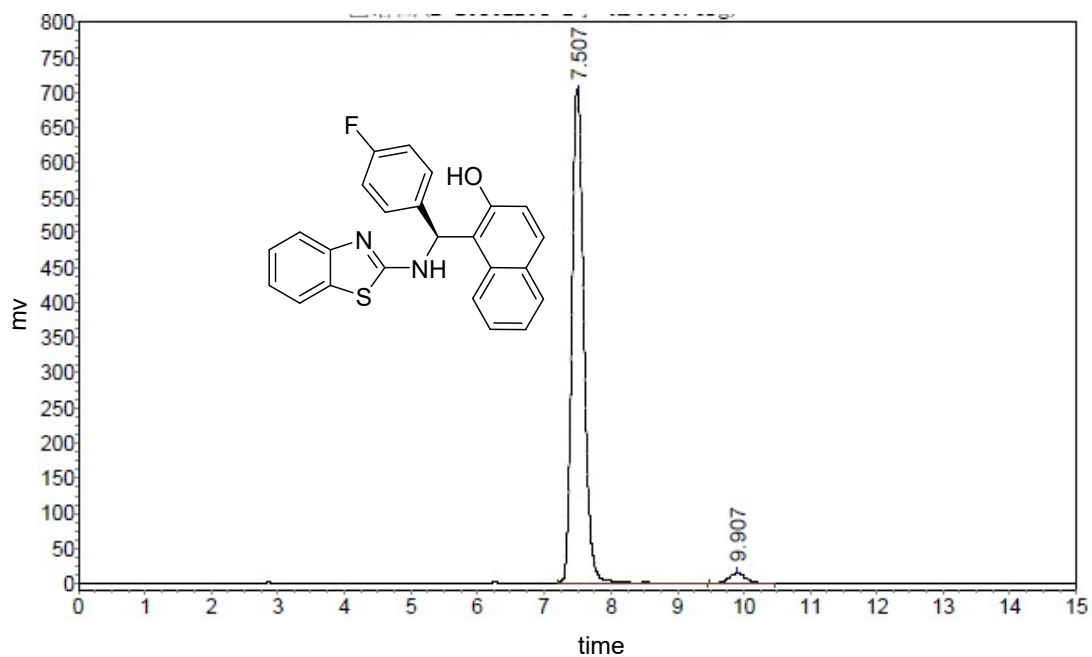

| Peak# | Ret. Time (min) | Height (mV*sec) | Area (mv)  | Area (%) |
|-------|-----------------|-----------------|------------|----------|
| 1     | 7.507           | 703042.063      | 701308.000 | 97.3544  |
| 2     | 9.907           | 14327.000       | 236456.297 | 2.6456   |

3fa

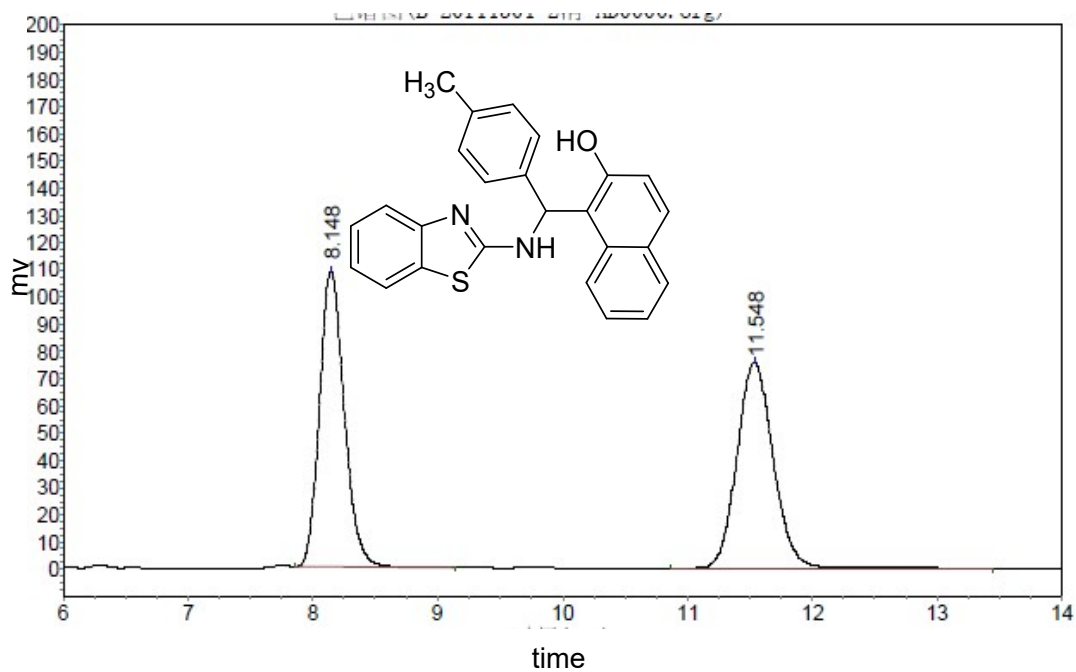

| Peak# | Ret. Time (min) | Height (mV*sec) | Area (mv)   | Area (%) |
|-------|-----------------|-----------------|-------------|----------|
| 1     | 8.148           | 109042.781      | 1523715.875 | 49.9619  |
| 2     | 11.548          | 75587.508       | 1526038.875 | 50.0381  |

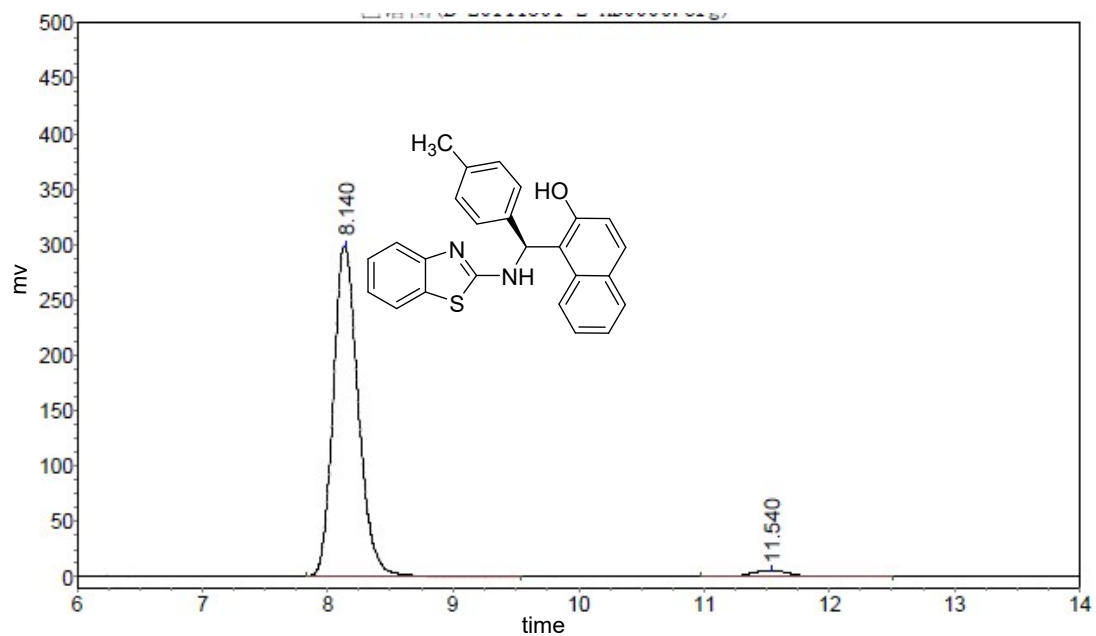

| Peak# | Ret. Time (min) | Height (mV*sec) | Area (mv)   | Area (%) |
|-------|-----------------|-----------------|-------------|----------|
| 1     | 8.140           | 298191.000      | 4152295.750 | 97.2020  |
| 2     | 11.540          | 5878.370        | 119526.102  | 2.7980   |

**3ga**

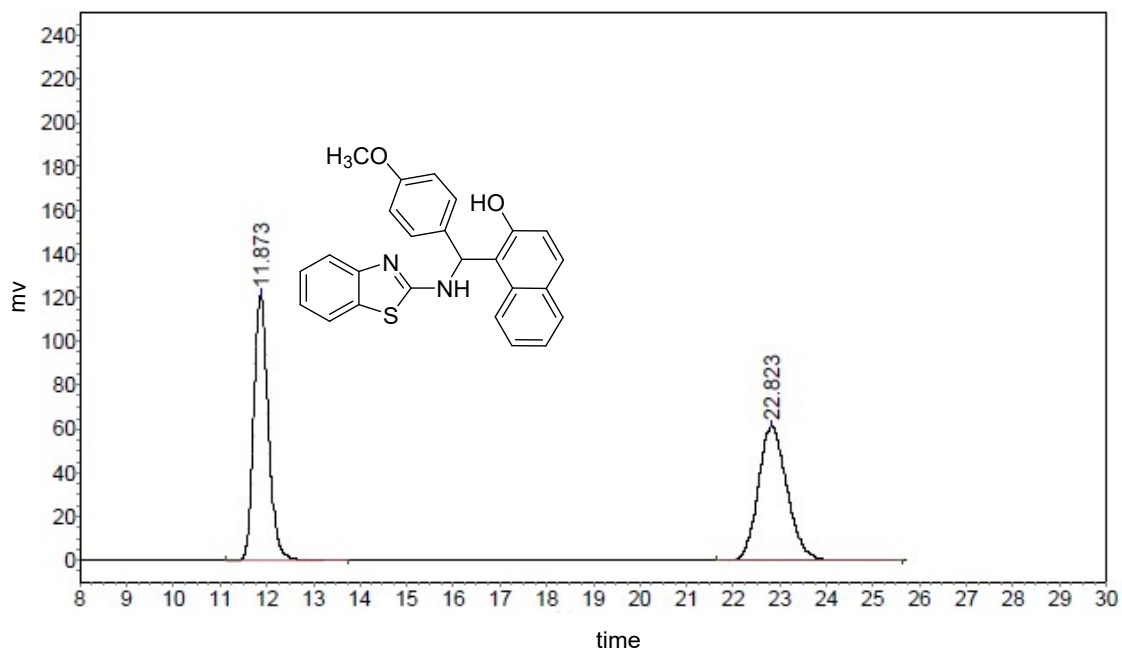

| Peak# | Ret. Time (min) | Height (mV*sec) | Area (mv)   | Area (%) |
|-------|-----------------|-----------------|-------------|----------|
| 1     | 11.873          | 121126.328      | 2620573.750 | 50.0023  |
| 2     | 22.823          | 61030.250       | 2620334.500 | 49.9977  |

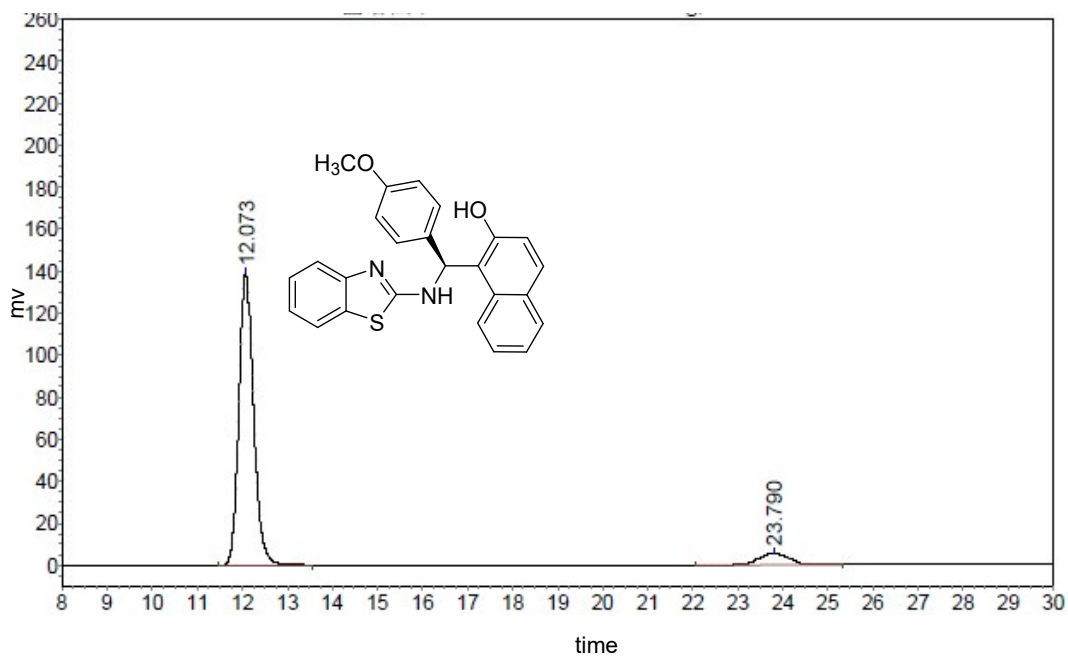

| Peak# | Ret. Time (min) | Height (mV*sec) | Area (mv)   | Area (%) |
|-------|-----------------|-----------------|-------------|----------|
| 1     | 12.073          | 138869.109      | 3165810.250 | 92.6276  |
| 2     | 23.790          | 5450.775        | 251973.906  | 7.3724   |

3ha

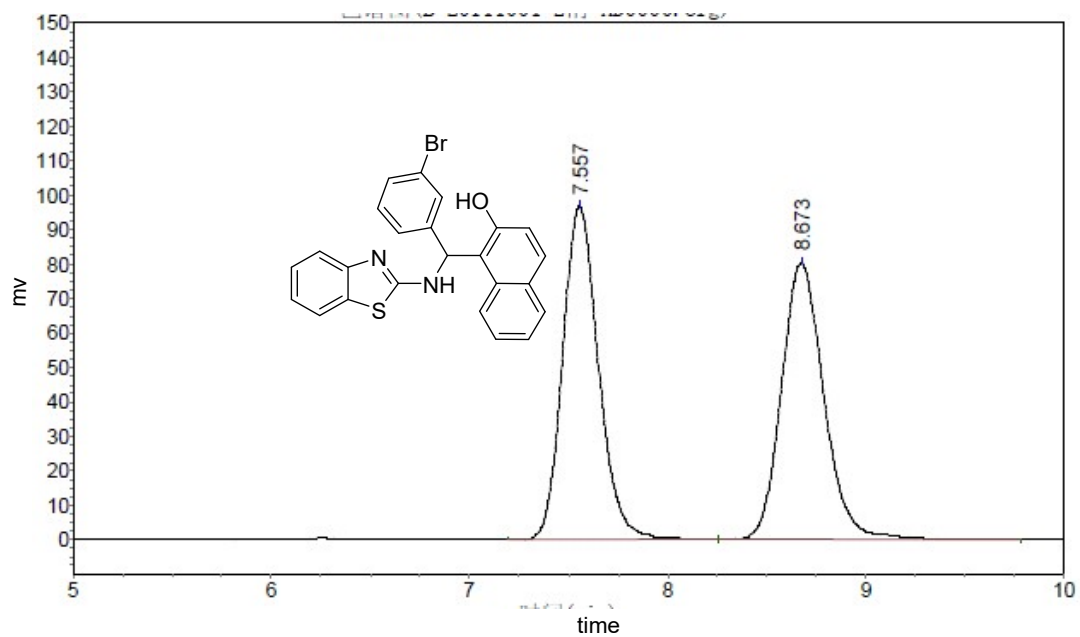

| Peak# | Ret. Time (min) | Height (mV*sec) | Area (mv)   | Area (%) |
|-------|-----------------|-----------------|-------------|----------|
| 1     | 7.557           | 96532.813       | 1211480.750 | 50.5840  |
| 2     | 8.673           | 80006.063       | 1183509.250 | 49.4160  |

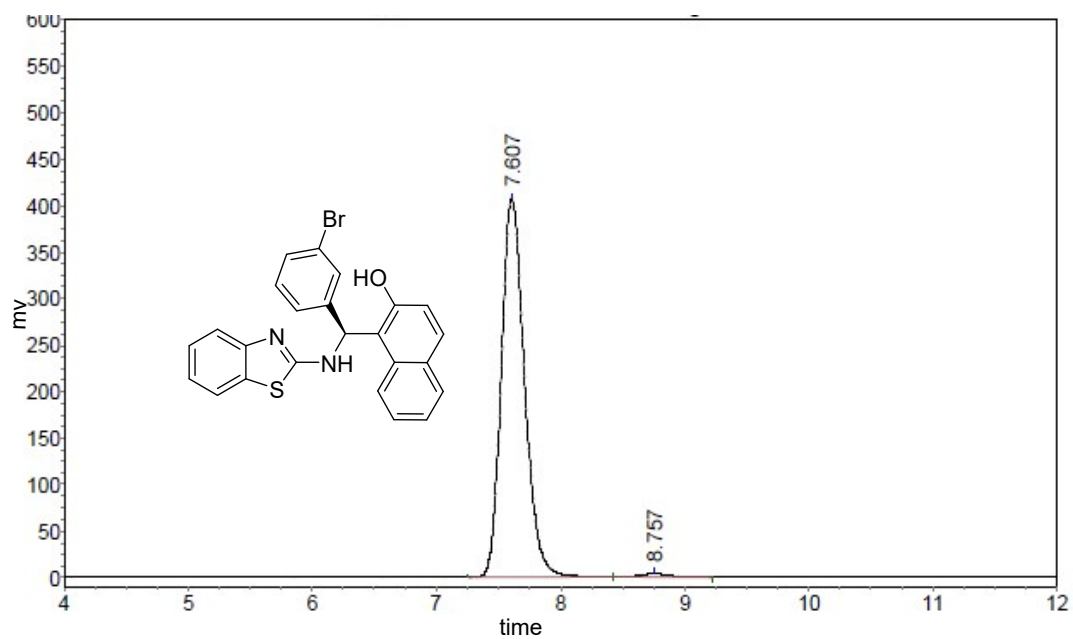

| Peak# | Ret. Time (min) | Height (mV*sec) | Area (mv)   | Area (%) |
|-------|-----------------|-----------------|-------------|----------|
| 1     | 7.607           | 407577.031      | 5295992.000 | 98.9284  |
| 2     | 8.757           | 3904.750        | 57364.301   | 1.0716   |



3ia

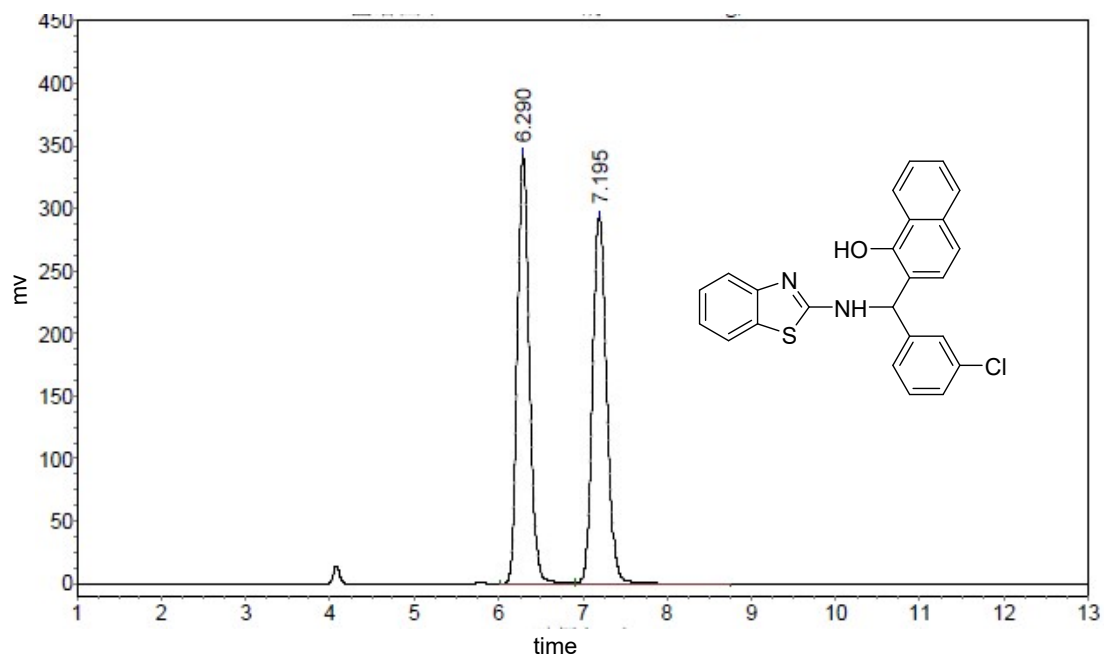

| Peak# | Ret. Time (min) | Height (mV*sec) | Area (mv)   | Area (%) |
|-------|-----------------|-----------------|-------------|----------|
| 1     | 6.290           | 343128.375      | 3374870.500 | 49.8512  |
| 2     | 7.195           | 293935.844      | 3395023.250 | 50.1488  |

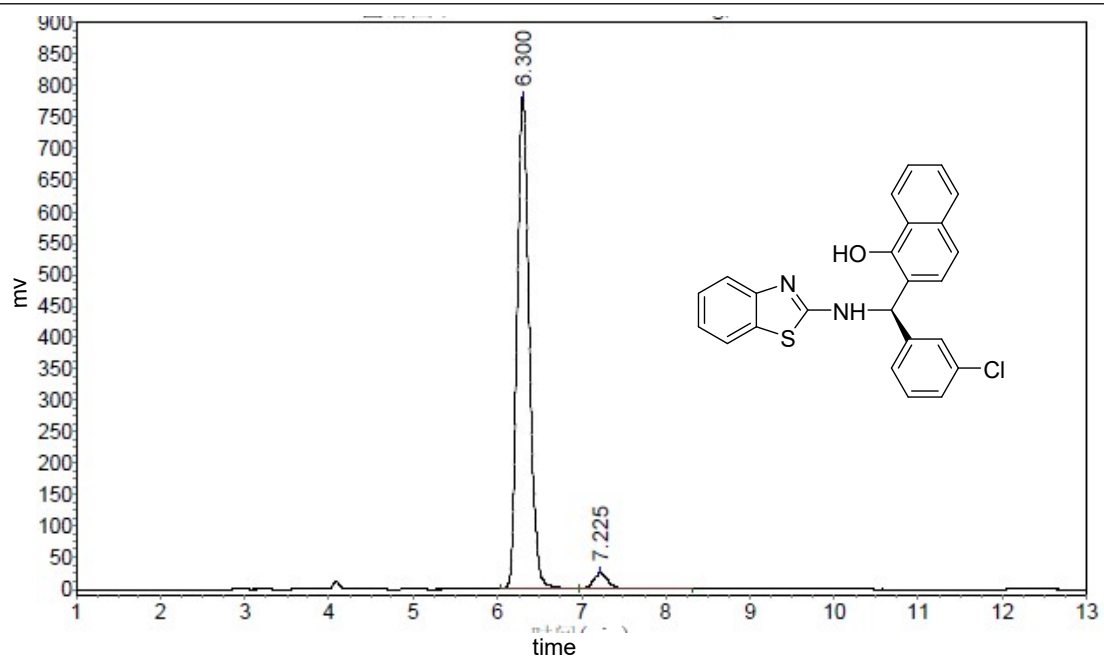

| Peak# | Ret. Time (min) | Height (mV*sec) | Area (mv) | Area (%) |
|-------|-----------------|-----------------|-----------|----------|
|-------|-----------------|-----------------|-----------|----------|

|   |       |            |             |         |
|---|-------|------------|-------------|---------|
| 1 | 6.300 | 780771.688 | 7838786.500 | 96.2398 |
| 2 | 7.225 | 25234.920  | 306272.219  | 3.7602  |

3ja

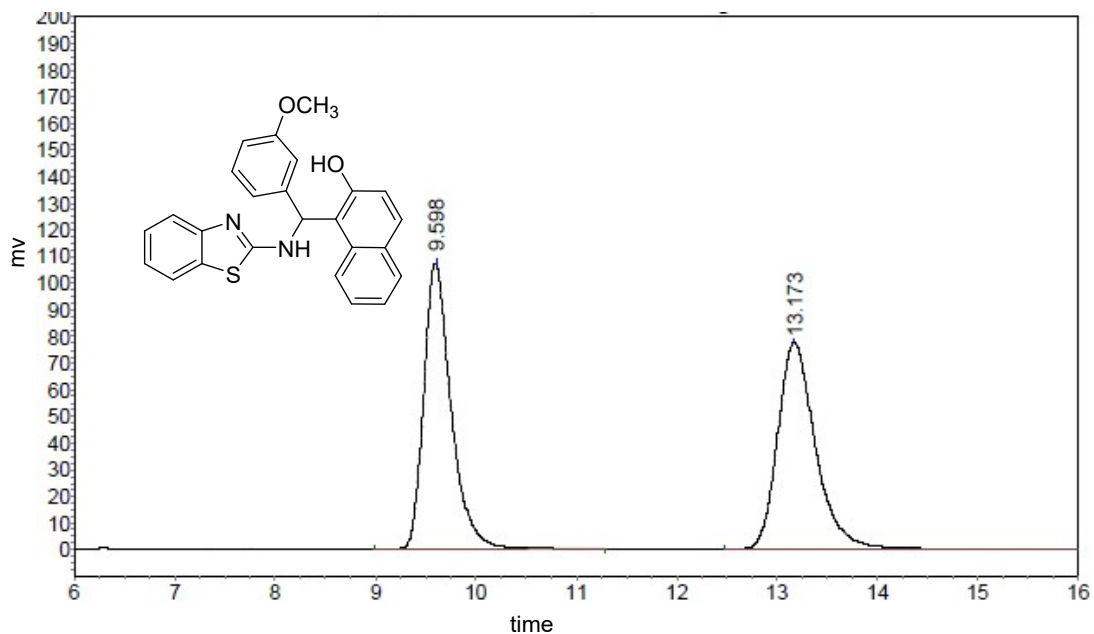

| Peak# | Ret. Time (min) | Height (mV*sec) | Area (mv)   | Area (%) |
|-------|-----------------|-----------------|-------------|----------|
| 1     | 9.598           | 106978.102      | 2036837.750 | 49.9146  |
| 2     | 13.173          | 77374.039       | 2043810.375 | 50.0854  |

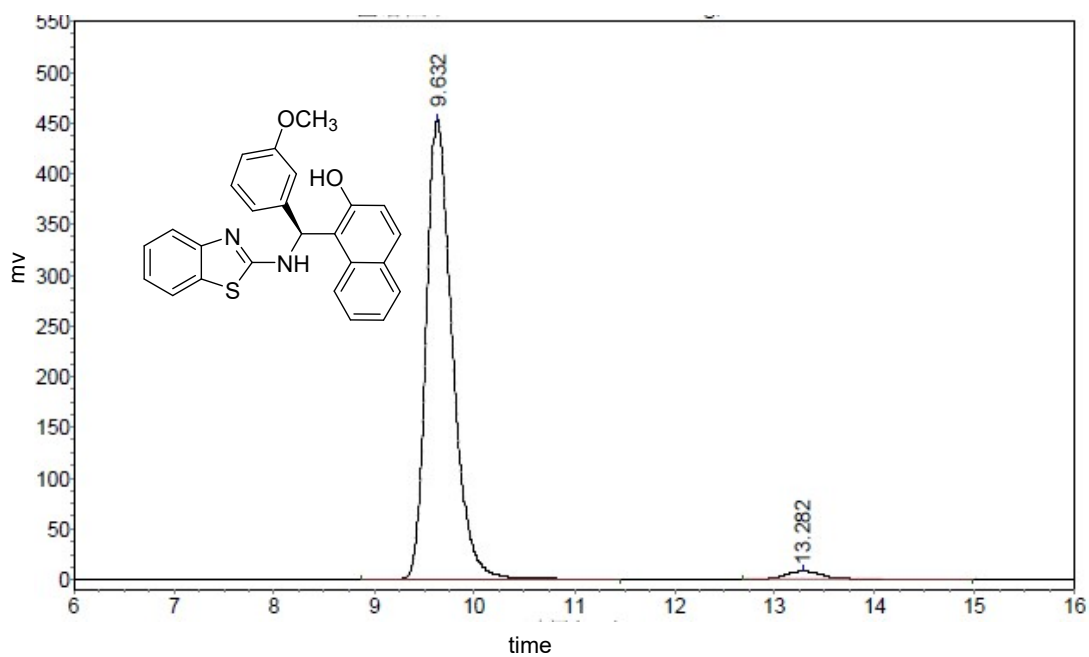

| Peak# | Ret. Time (min) | Height (mV*sec) | Area (mv)   | Area (%) |
|-------|-----------------|-----------------|-------------|----------|
| 1     | 9.632           | 453973.563      | 8235654.500 | 97.4943  |
| 2     | 13.282          | 8288.007        | 211660.297  | 2.5057   |

3ka

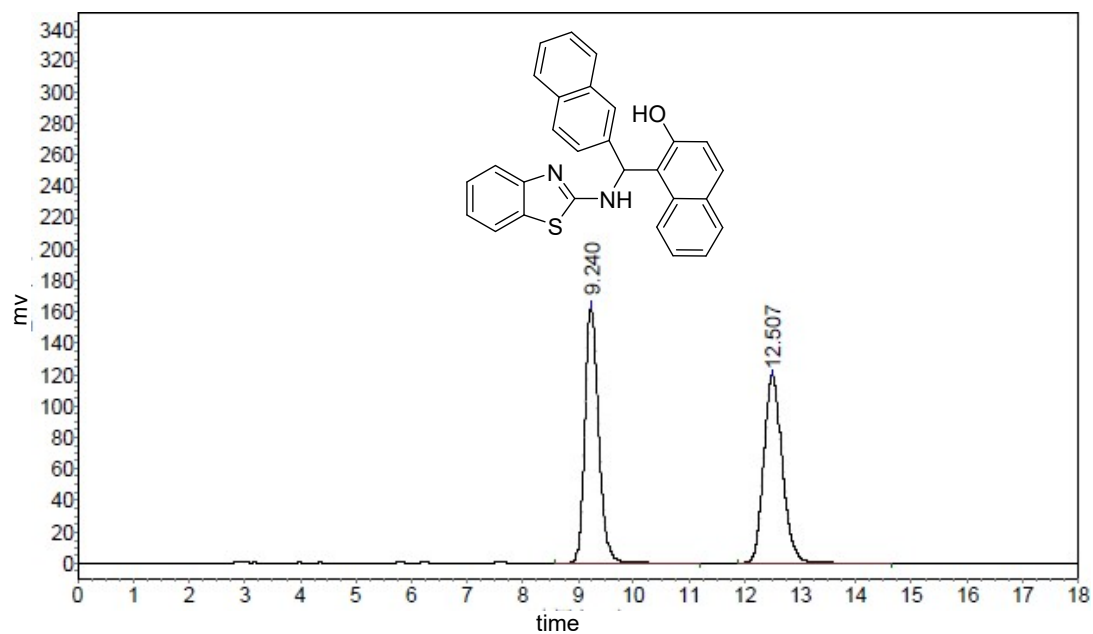

| Peak# | Ret. Time (min) | Height (mV*sec) | Area (mv)   | Area (%) |
|-------|-----------------|-----------------|-------------|----------|
| 1     | 9.240           | 163233.813      | 2796312.000 | 50.1140  |
| 2     | 12.507          | 119537.086      | 2783587.750 | 49.8860  |

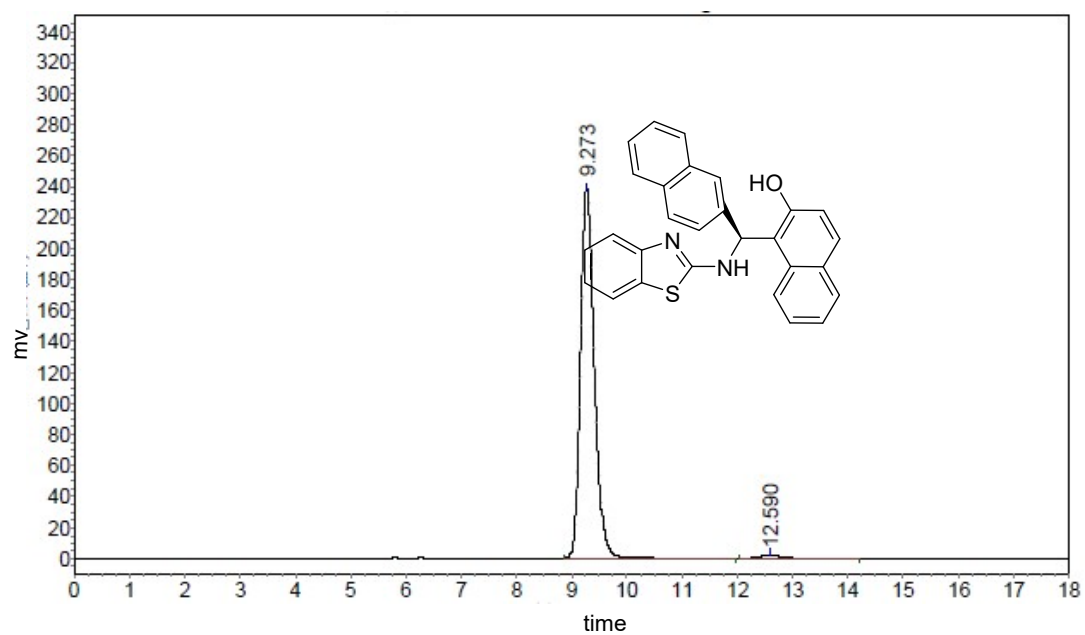

| Peak# | Ret. Time (min) | Height (mV*sec) | Area (mv) | Area (%) |
|-------|-----------------|-----------------|-----------|----------|
|-------|-----------------|-----------------|-----------|----------|

|   |        |            |             |         |
|---|--------|------------|-------------|---------|
| 1 | 9.273  | 238114.203 | 4140383.250 | 98.6271 |
| 2 | 12.590 | 2395.122   | 57632.602   | 1.3729  |

**3la**

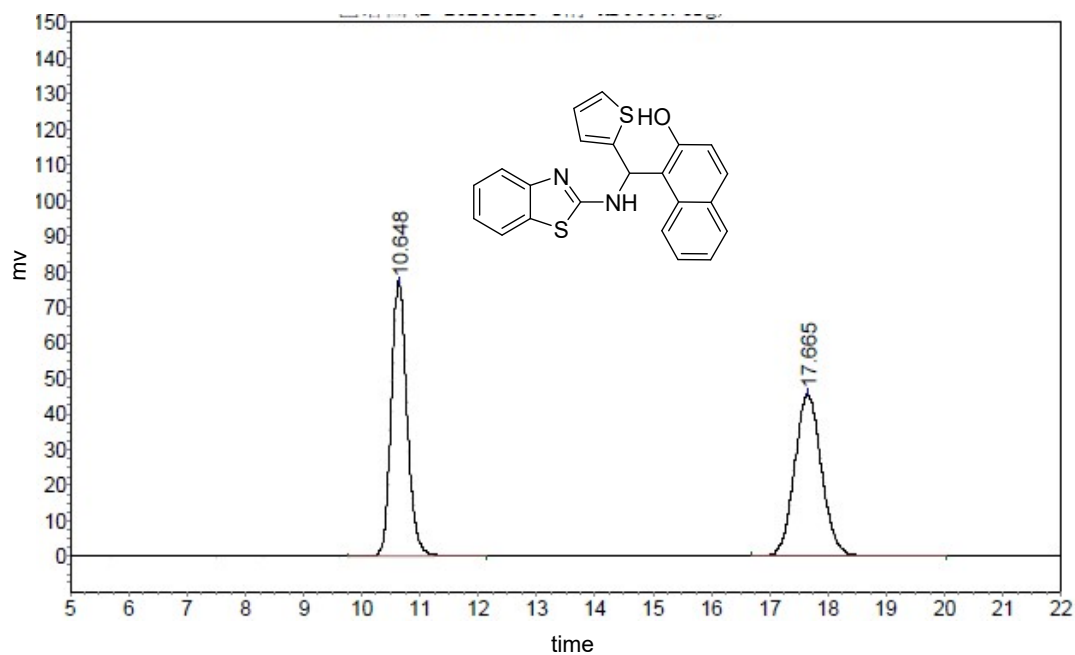

| Peak# | Ret. Time (min) | Height (mV*sec) | Area (mv)   | Area (%) |
|-------|-----------------|-----------------|-------------|----------|
| 1     | 10.648          | 76907.164       | 1451676.750 | 49.9171  |
| 2     | 17.665          | 45294.012       | 1456496.000 | 50.0829  |

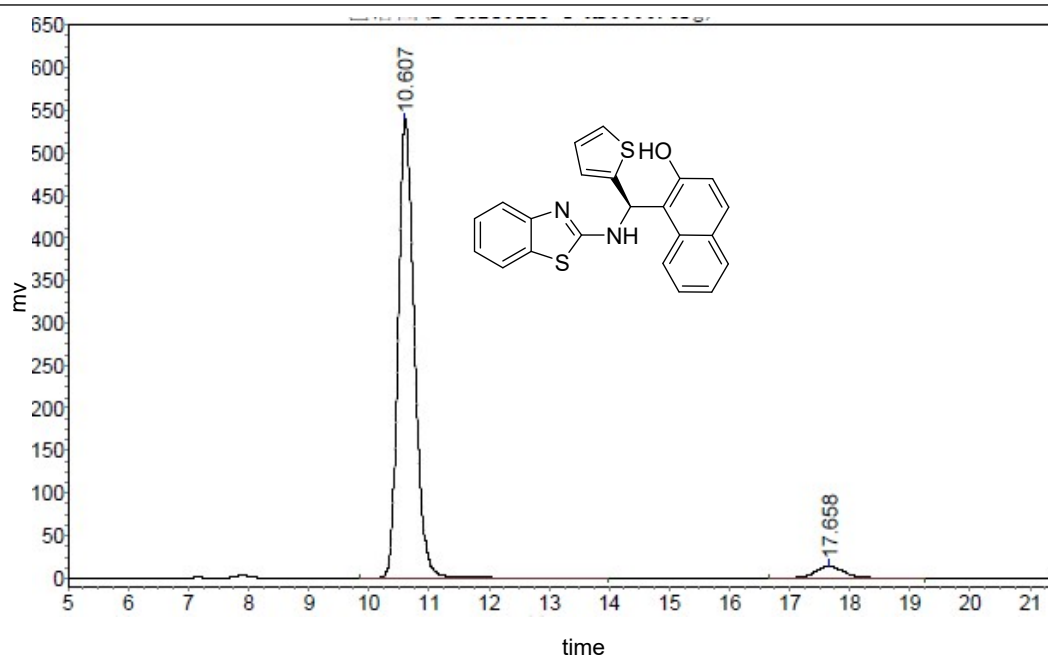

| Peak# | Ret. Time (min) | Height (mV*sec) | Area (mv)    | Area (%) |
|-------|-----------------|-----------------|--------------|----------|
| 1     | 10.607          | 539487.313      | 10148960.000 | 95.6469  |
| 2     | 17.658          | 14434.413       | 461906.469   | 4.3531   |

3ma

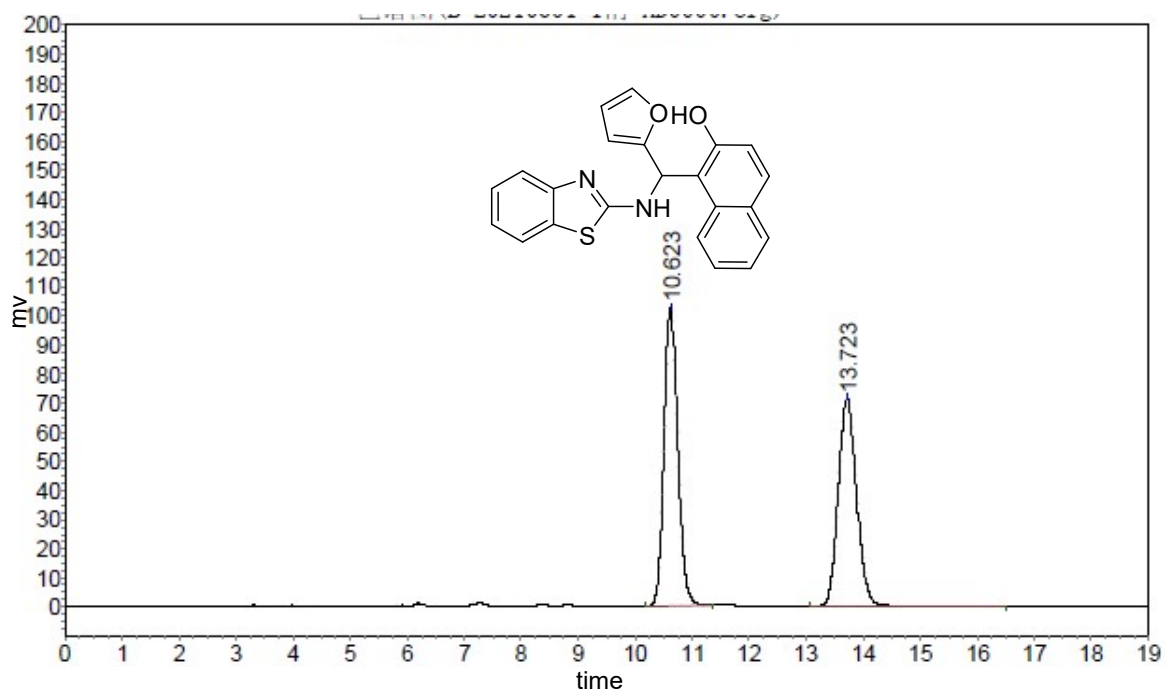

| Peak# | Ret. Time (min) | Height (mV*sec) | Area (mv)   | Area (%) |
|-------|-----------------|-----------------|-------------|----------|
| 1     | 10.623          | 102390.078      | 1741645.375 | 51.9279  |
| 2     | 13.723          | 71460.461       | 1612321.500 | 48.0721  |

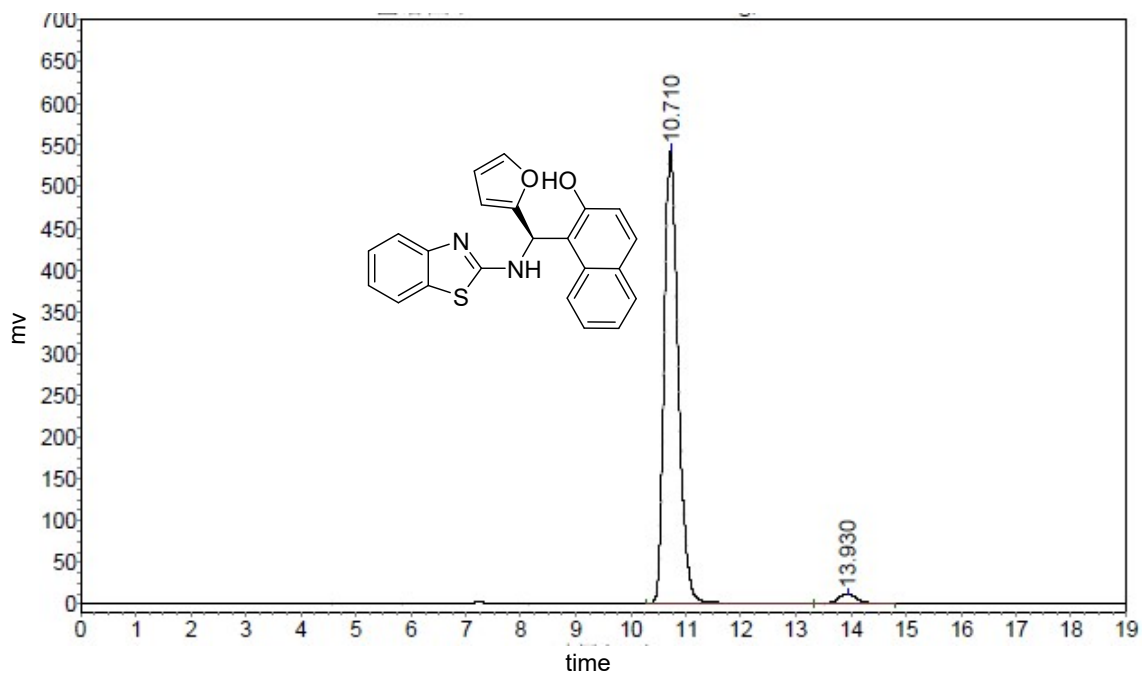

| Peak# | Ret. Time (min) | Height (mV*sec) | Area (mv)   | Area (%) |
|-------|-----------------|-----------------|-------------|----------|
| 1     | 10.710          | 543389.375      | 9627044.000 | 97.3318  |
| 2     | 13.930          | 11547.053       | 263908.563  | 2.6682   |

3na

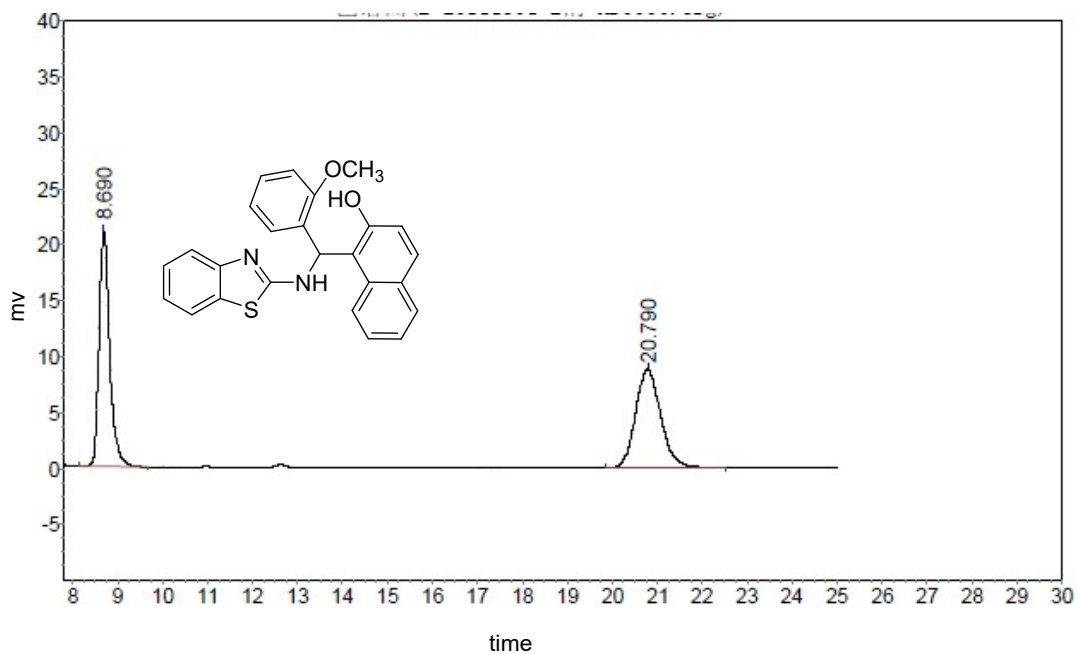

| Peak# | Ret. Time (min) | Height (mV*sec) | Area (mv)  | Area (%) |
|-------|-----------------|-----------------|------------|----------|
| 1     | 8.690           | 21036.607       | 342912.406 | 50.3763  |
| 2     | 20.790          | 8758.305        | 337788.813 | 49.6236  |

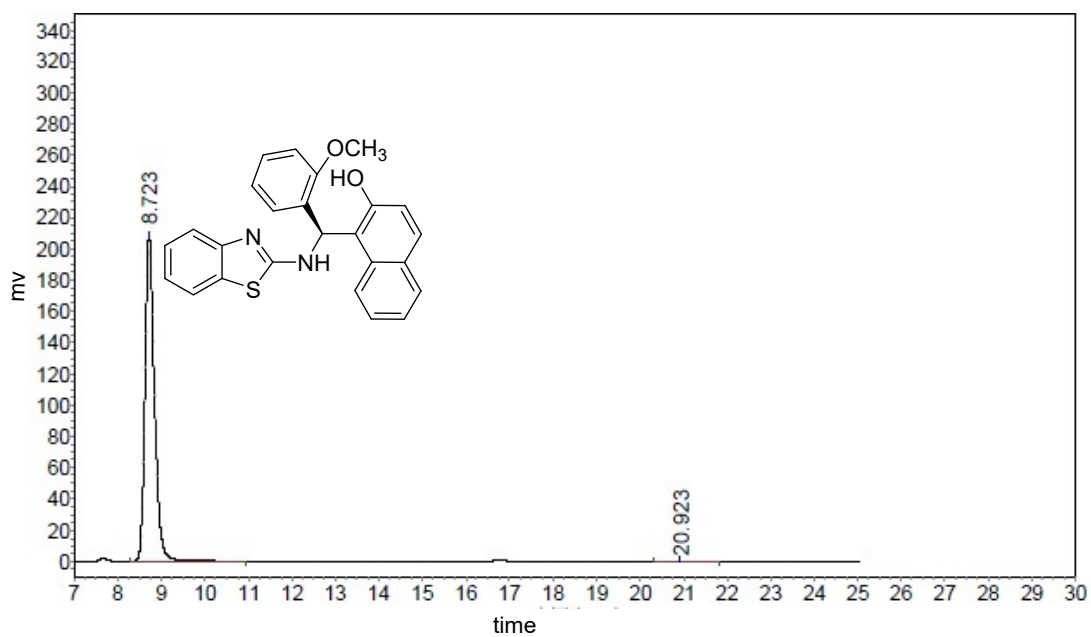

| Peak# | Ret. Time (min) | Height (mV*sec) | Area (mv)   | Area (%) |
|-------|-----------------|-----------------|-------------|----------|
| 1     | 8.723           | 207264.047      | 3193744.000 | 99.8703  |
| 2     | 20.923          | 111.505         | 4148.000    | 0.1297   |

30a

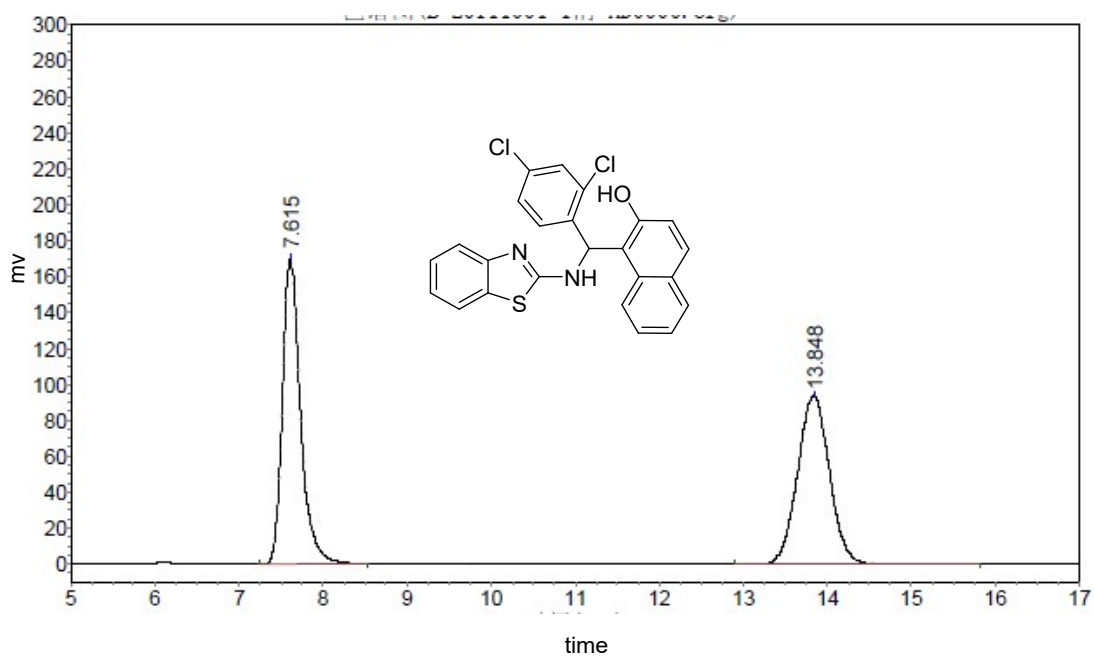

| Peak# | Ret. Time (min) | Height (mV*sec) | Area (mv) | Area (%) |
|-------|-----------------|-----------------|-----------|----------|
|-------|-----------------|-----------------|-----------|----------|

|   |        |            |             |         |
|---|--------|------------|-------------|---------|
| 1 | 7.615  | 169371.922 | 2536585.250 | 50.6551 |
| 2 | 13.848 | 93501.430  | 2470975.000 | 49.3449 |

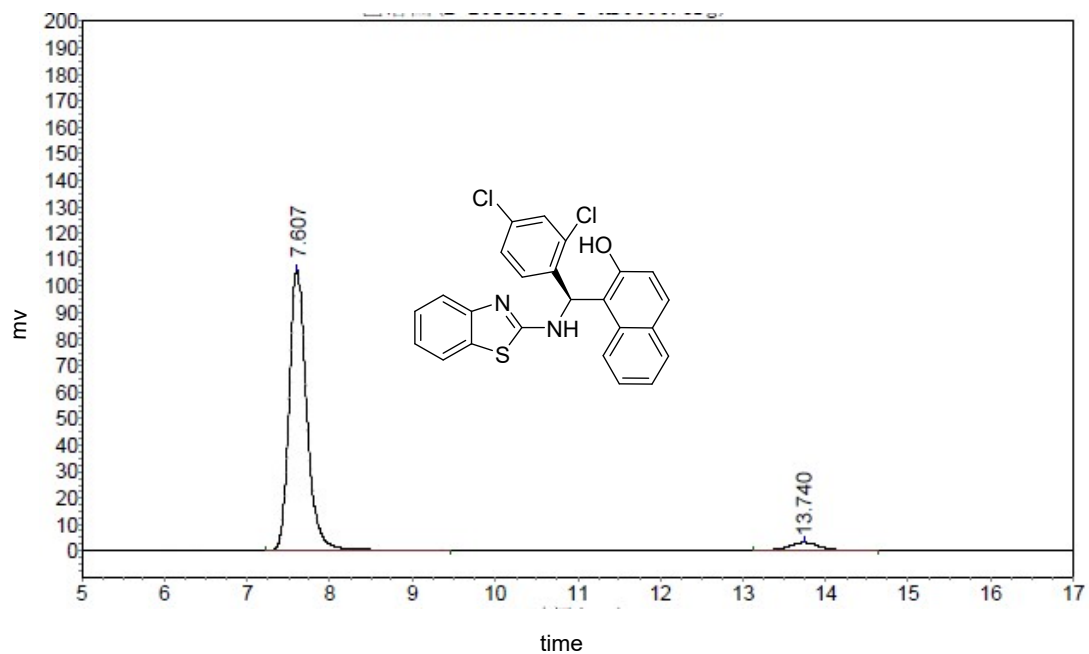

| Peak# | Ret. Time (min) | Height (mV*sec) | Area (mv)   | Area (%) |
|-------|-----------------|-----------------|-------------|----------|
| 1     | 7.607           | 106127.859      | 1569139.375 | 95.2093  |
| 2     | 13.740          | 3050.131        | 78955.148   | 4.7907   |

3pa



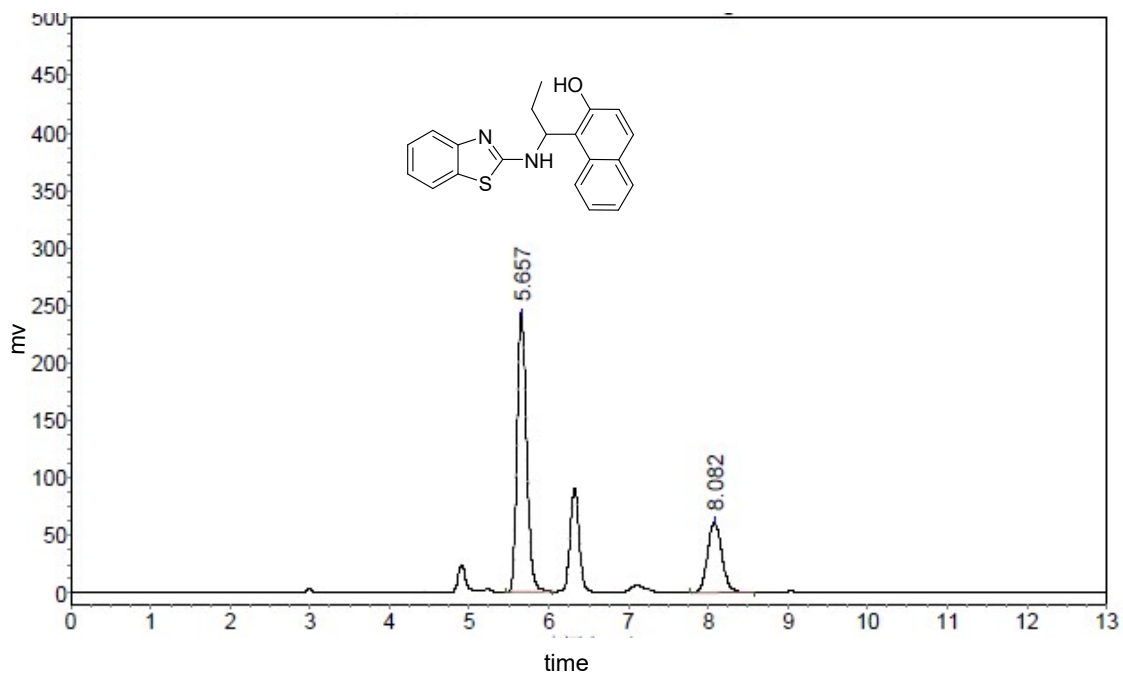

| Peak# | Ret. Time (min) | Height (mV*sec) | Area (mv)   | Area (%) |
|-------|-----------------|-----------------|-------------|----------|
| 1     | 5.657           | 340418.063      | 2849213.000 | 49.4188  |
| 2     | 8.082           | 226742.844      | 2916235.750 | 50.5812  |

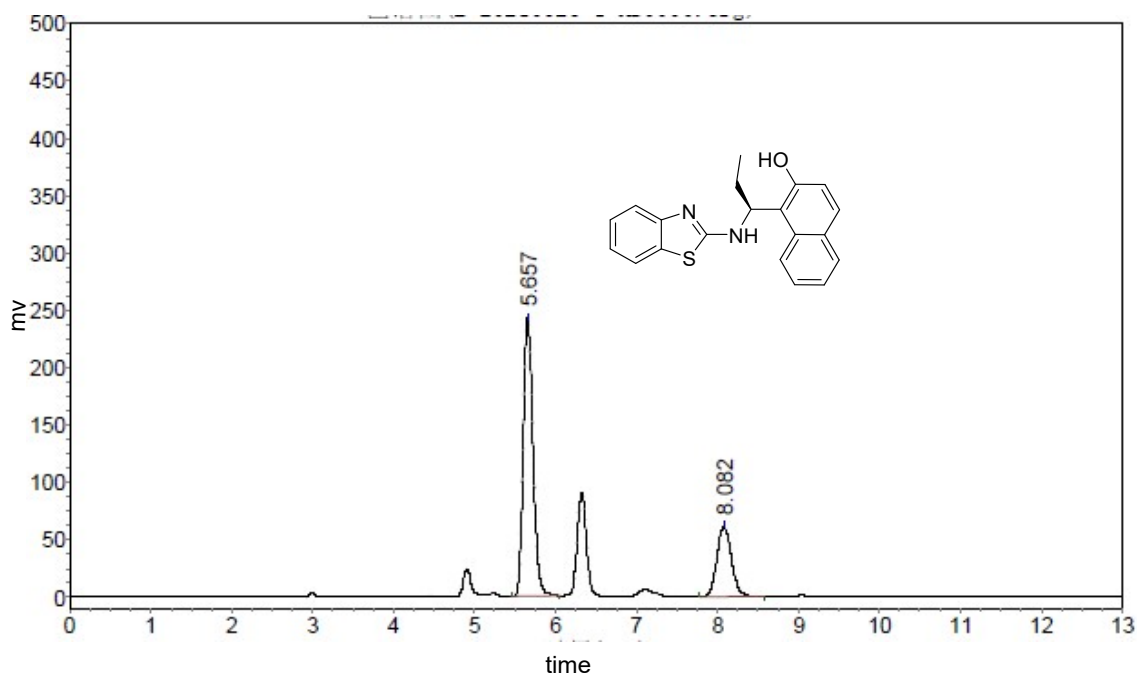

| Peak# | Ret. Time (min) | Height (mV*sec) | Area (mv)   | Area (%) |
|-------|-----------------|-----------------|-------------|----------|
| 1     | 5.657           | 241767.000      | 2007547.250 | 72.1178  |
| 2     | 8.082           | 61316.758       | 776159.438  | 27.8822  |

3qa

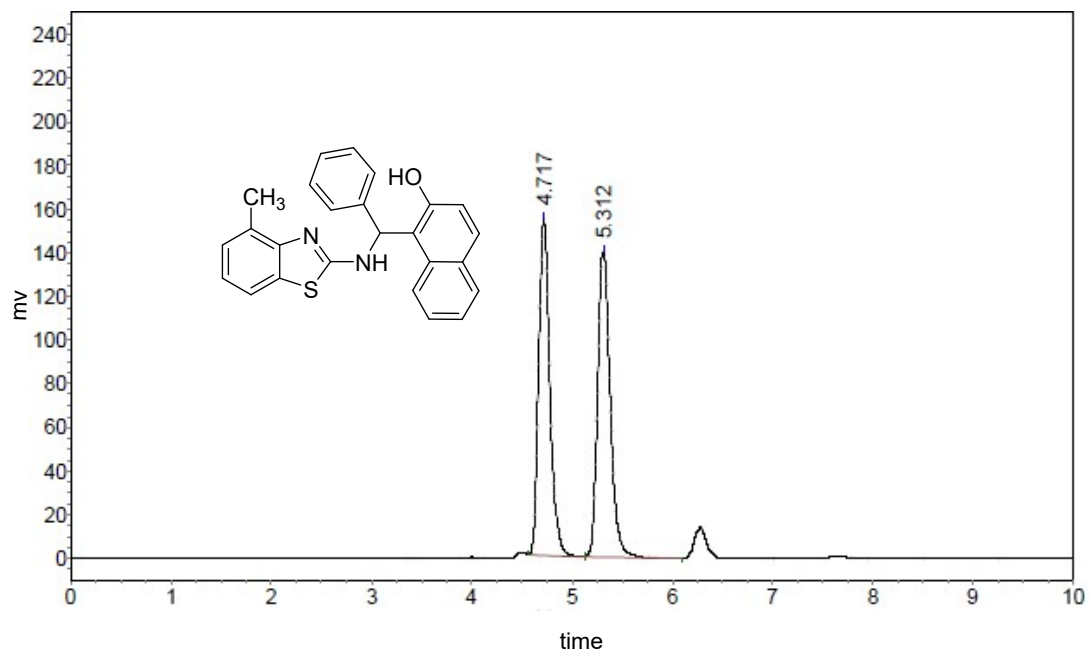

| Peak# | Ret. Time (min) | Height (mV*sec) | Area (mv)   | Area (%) |
|-------|-----------------|-----------------|-------------|----------|
| 1     | 4.717           | 154520.938      | 1186992.125 | 49.5108  |
| 2     | 5.312           | 139928.094      | 1210446.500 | 50.4892  |

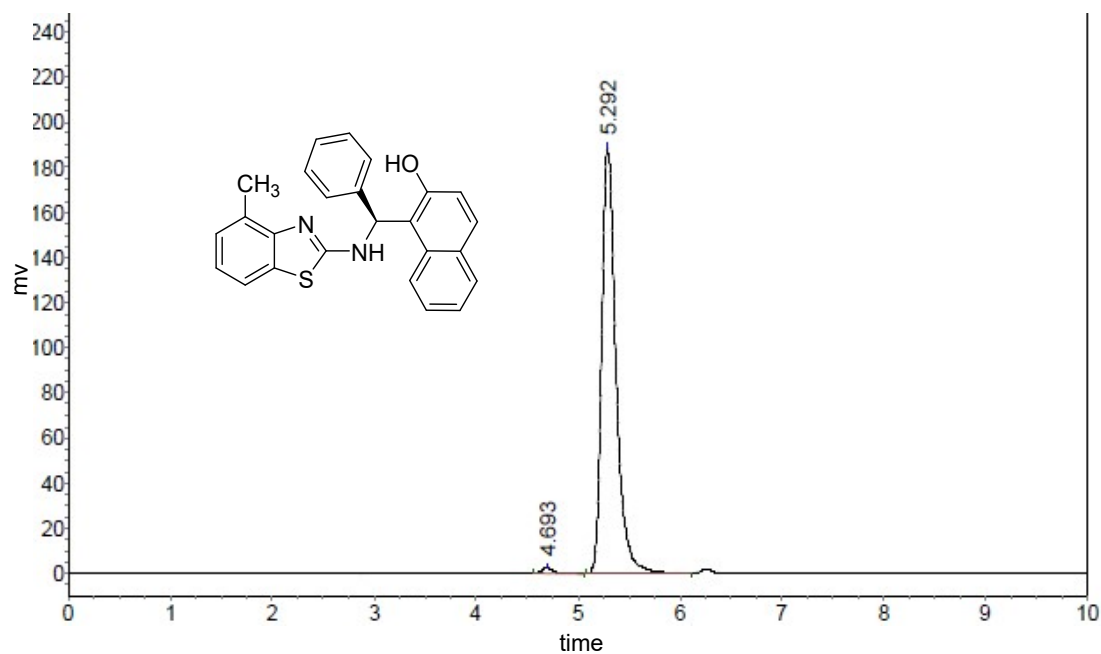

| Peak# | Ret. Time (min) | Height (mV*sec) | Area (mv)   | Area (%) |
|-------|-----------------|-----------------|-------------|----------|
| 1     | 4.693           | 2125.622        | 18382.504   | 0.9944   |
| 2     | 5.292           | 188388.750      | 1830248.000 | 99.0056  |

3ra

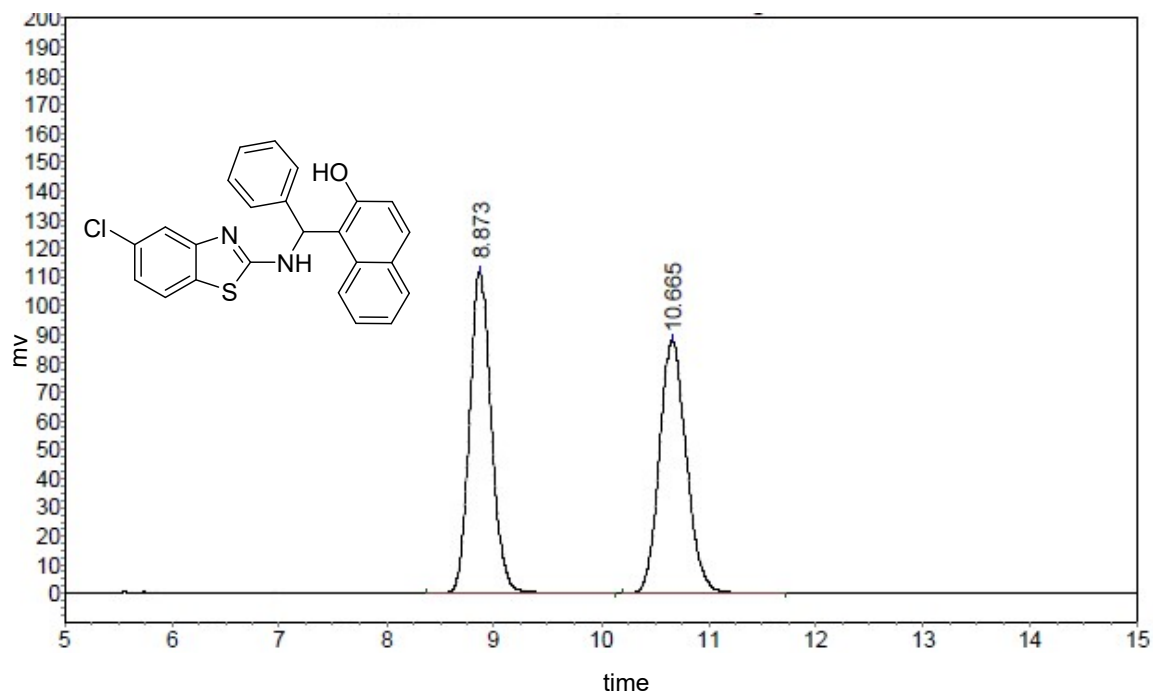

| Peak# | Ret. Time (min) | Height (mV*sec) | Area (mv)   | Area (%) |
|-------|-----------------|-----------------|-------------|----------|
| 1     | 8.873           | 111873.570      | 1576312.375 | 50.6126  |
| 2     | 10.665          | 88131.977       | 1538150.875 | 49.3874  |

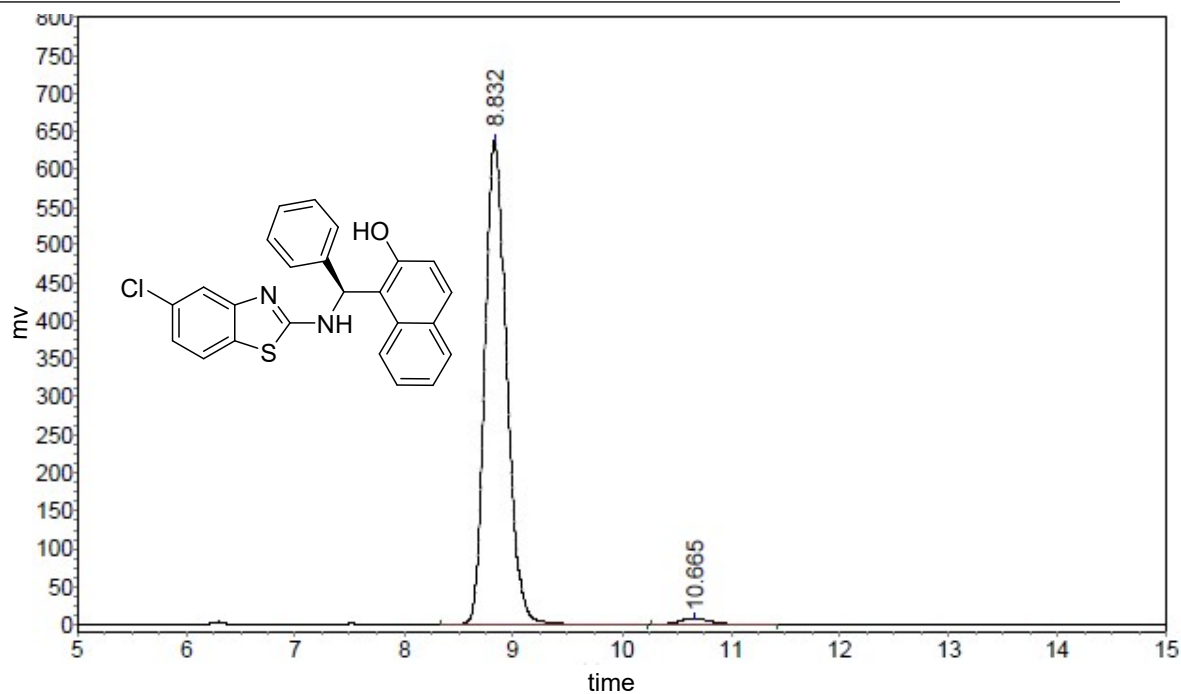

| Peak# | Ret. Time (min) | Height (mV*sec) | Area (mv)   | Area (%) |
|-------|-----------------|-----------------|-------------|----------|
| 1     | 8.832           | 638030.563      | 8831569.000 | 98.4319  |
| 2     | 10.665          | 8163.655        | 140692.953  | 1.5681   |

3sa

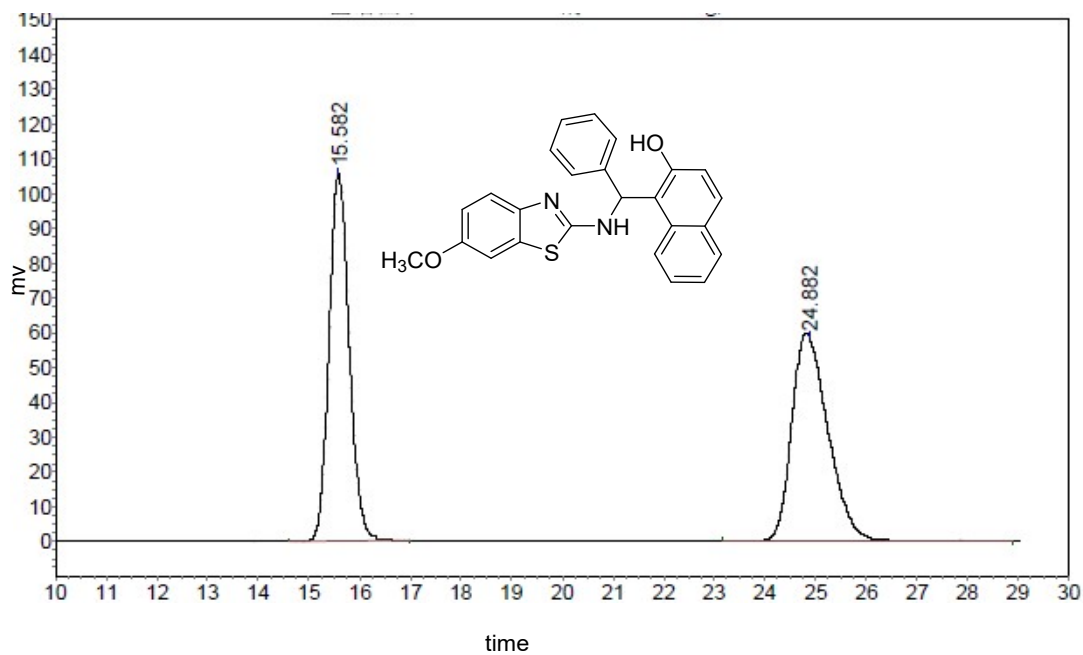

| Peak# | Ret. Time (min) | Height (mV*sec) | Area (mv)   | Area (%) |
|-------|-----------------|-----------------|-------------|----------|
| 1     | 15.582          | 105389.063      | 2919095.750 | 49.7084  |
| 2     | 24.882          | 59336.141       | 2953338.750 | 50.2916  |

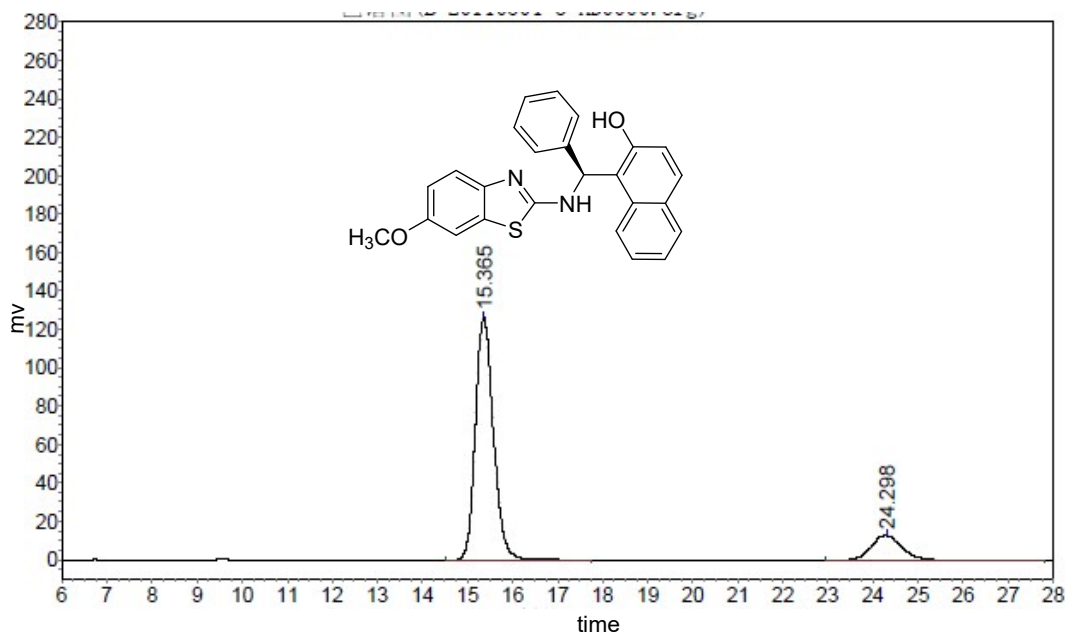

| Peak# | Ret. Time (min) | Height (mV*sec) | Area (mv)   | Area (%) |
|-------|-----------------|-----------------|-------------|----------|
| 1     | 15.365          | 126085.805      | 3484544.000 | 85.9216  |

3ta

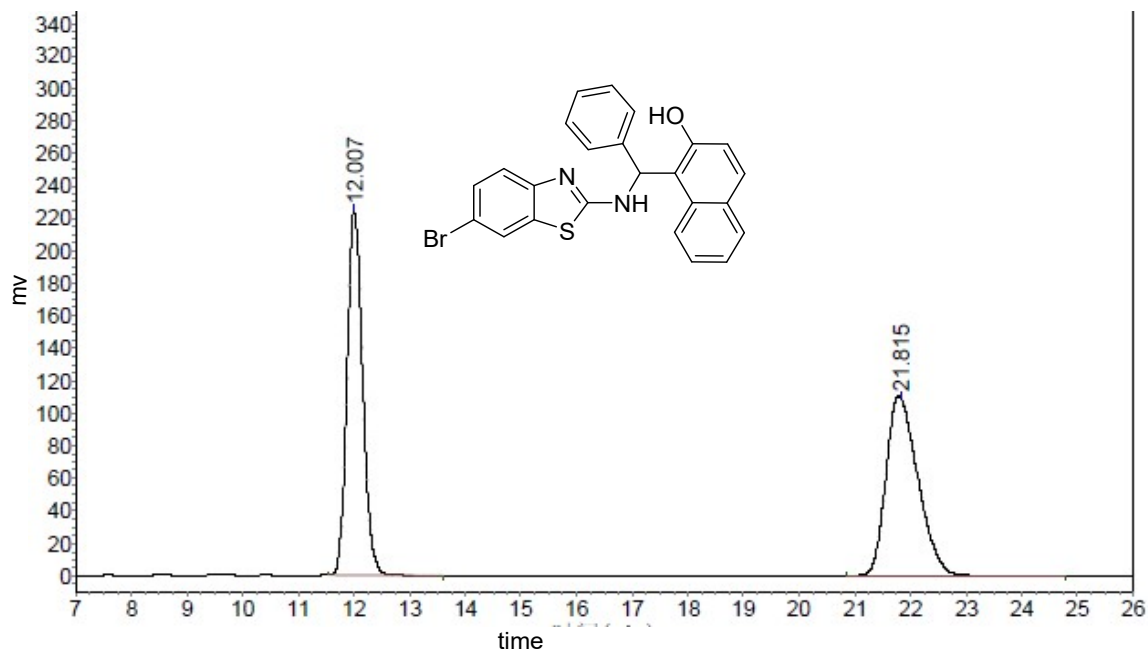

| Peak# | Ret. Time (min) | Height (mV*sec) | Area (mv)   | Area (%) |
|-------|-----------------|-----------------|-------------|----------|
| 1     | 12.007          | 225066.734      | 4404016.500 | 50.0496  |
| 2     | 21.815          | 110261.000      | 4395291.000 | 49.9504  |

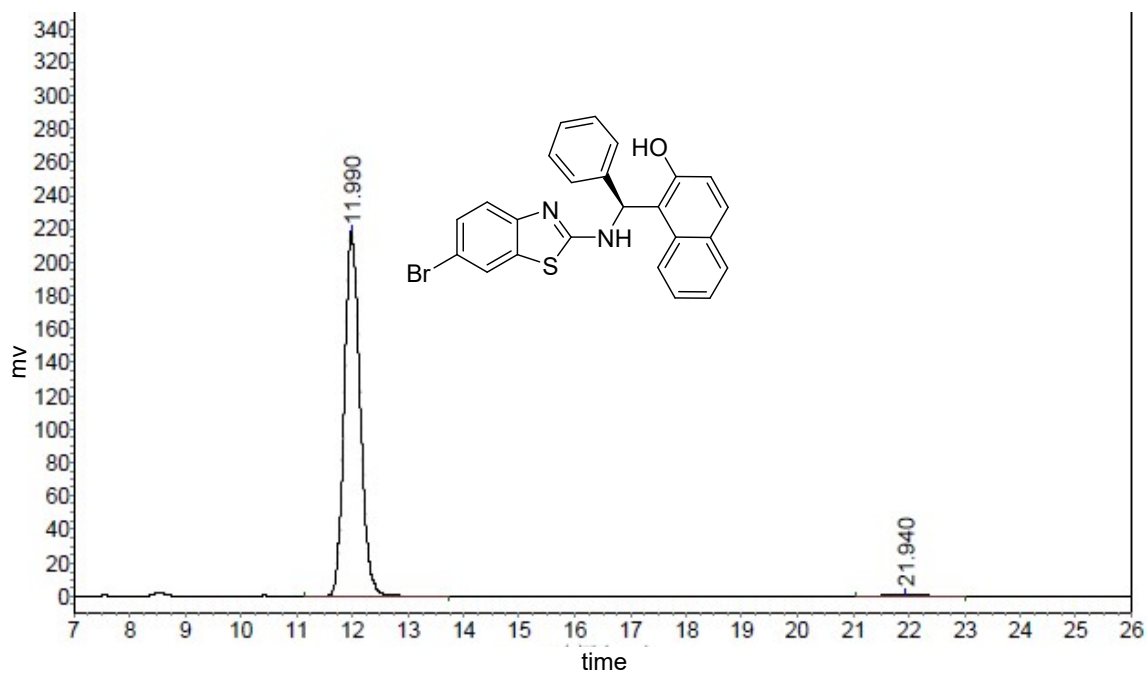

| Peak# | Ret. Time (min) | Height (mV*sec) | Area (mv)   | Area (%) |
|-------|-----------------|-----------------|-------------|----------|
| 1     | 11.990          | 218125.828      | 4303426.000 | 98.9127  |
| 2     | 21.940          | 1270.353        | 47306.000   | 1.0873   |

3ua

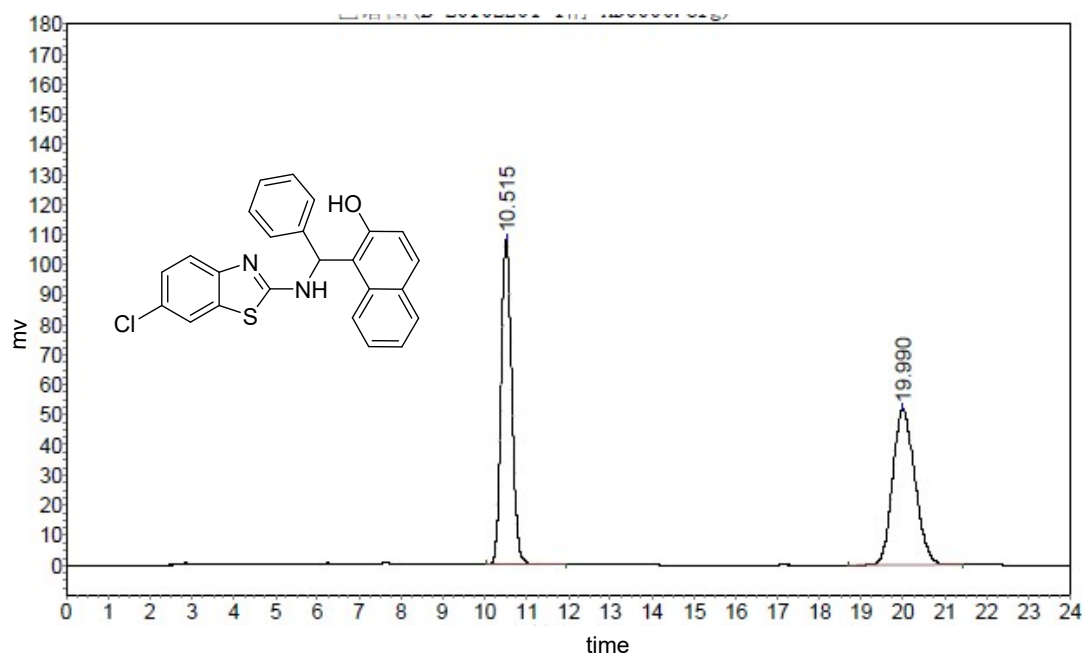

| Peak# | Ret. Time (min) | Height (mV*sec) | Area (mv)   | Area (%) |
|-------|-----------------|-----------------|-------------|----------|
| 1     | 10.515          | 108218.914      | 1904935.750 | 49.7608  |
| 2     | 19.990          | 51843.641       | 1923248.000 | 50.2392  |

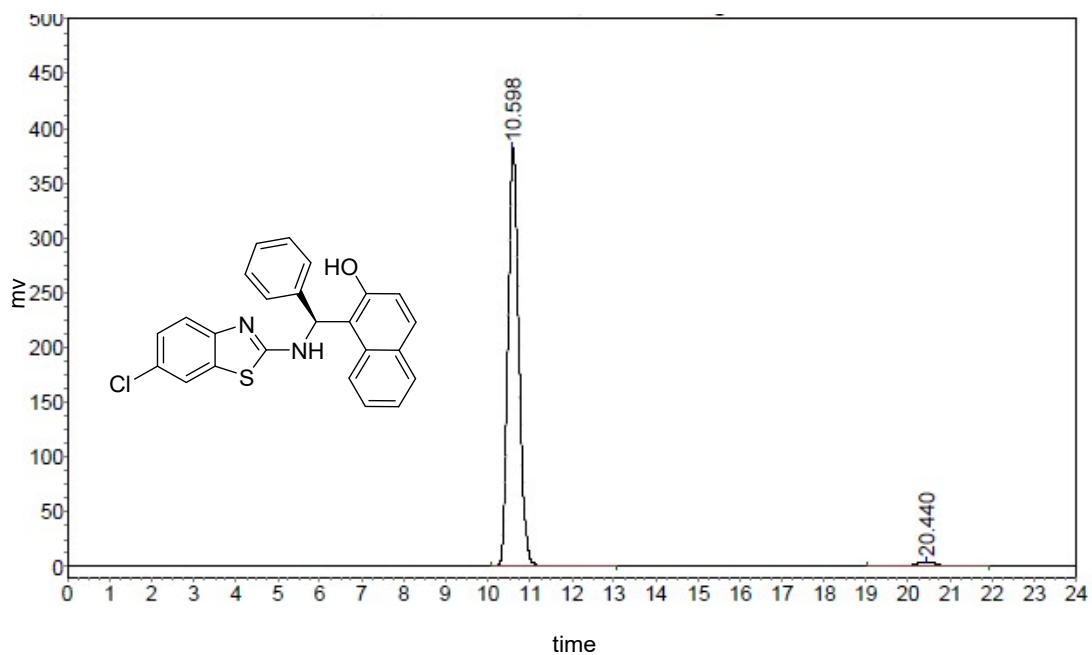

| Peak# | Ret. Time (min) | Height (mV*sec) | Area (mv)   | Area (%) |
|-------|-----------------|-----------------|-------------|----------|
| 1     | 10.598          | 382101.719      | 6904129.500 | 97.9246  |
| 2     | 20.440          | 3926.406        | 146323.203  | 2.0754   |

**3ab**

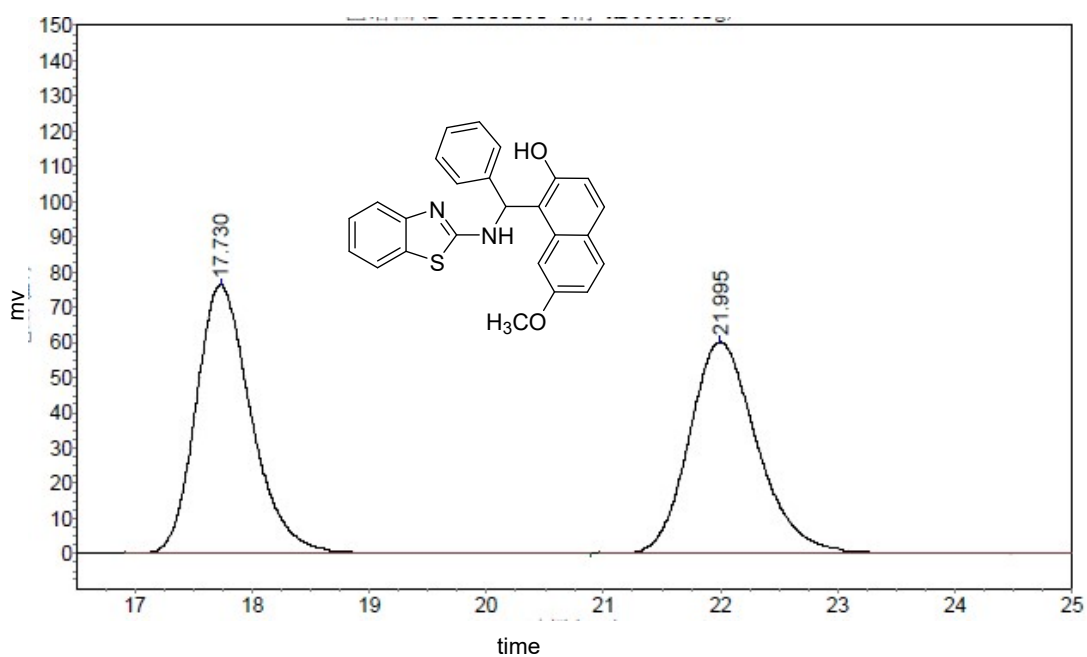

| Peak# | Ret. Time (min) | Height (mV*sec) | Area (mv) | Area (%) |
|-------|-----------------|-----------------|-----------|----------|
|-------|-----------------|-----------------|-----------|----------|

|   |        |           |             |         |
|---|--------|-----------|-------------|---------|
| 1 | 17.730 | 76191.742 | 2492876.750 | 50.7228 |
| 2 | 21.995 | 60027.770 | 2421831.500 | 49.2772 |

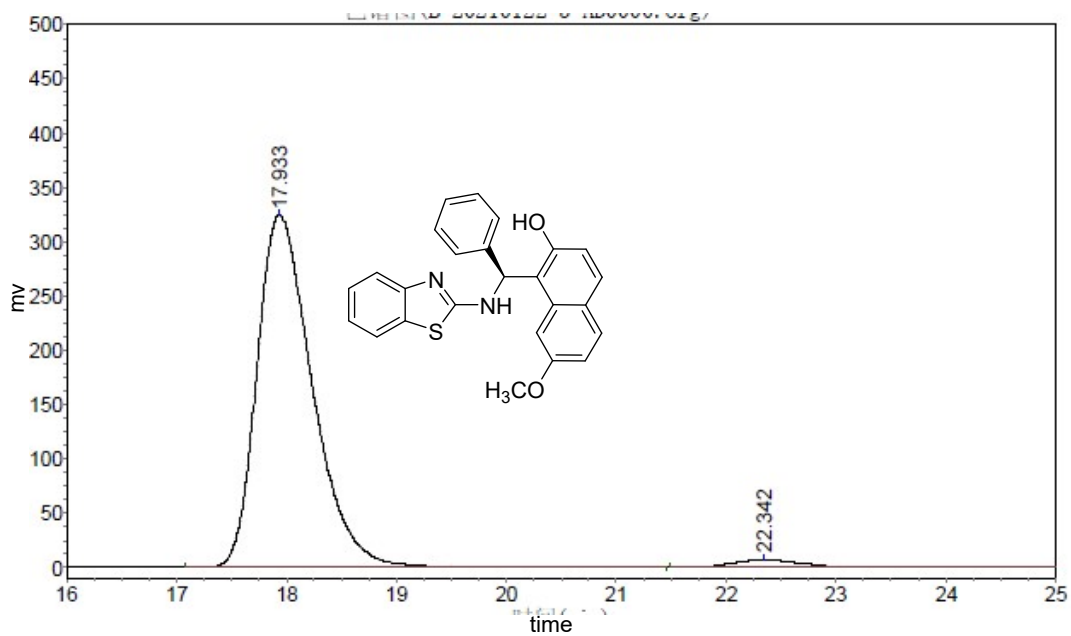

| Peak# | Ret. Time (min) | Height (mV*sec) | Area (mv)    | Area (%) |
|-------|-----------------|-----------------|--------------|----------|
| 1     | 17.933          | 324475.469      | 11387319.000 | 97.3346  |
| 2     | 22.342          | 7223.419        | 311833.781   | 2.6654   |

### 3ac

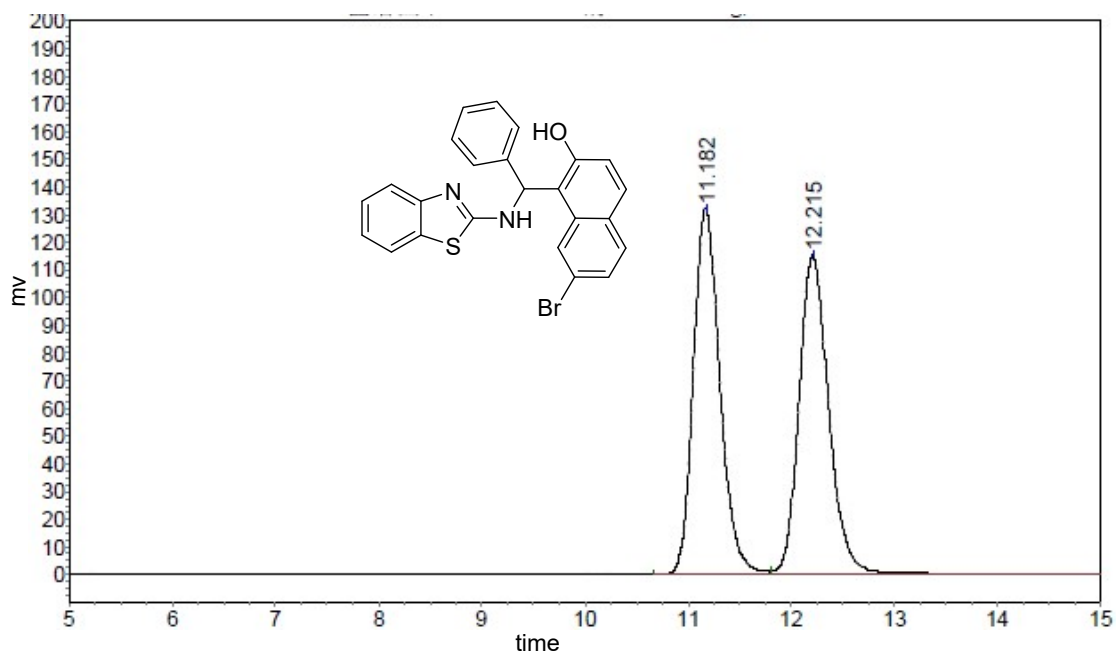



| Peak# | Ret. Time (min) | Height (mV*sec) | Area (mv)   | Area (%) |
|-------|-----------------|-----------------|-------------|----------|
| 1     | 11.182          | 131963.406      | 2363182.500 | 50.4834  |
| 2     | 12.215          | 115029.234      | 2317921.500 | 49.5166  |

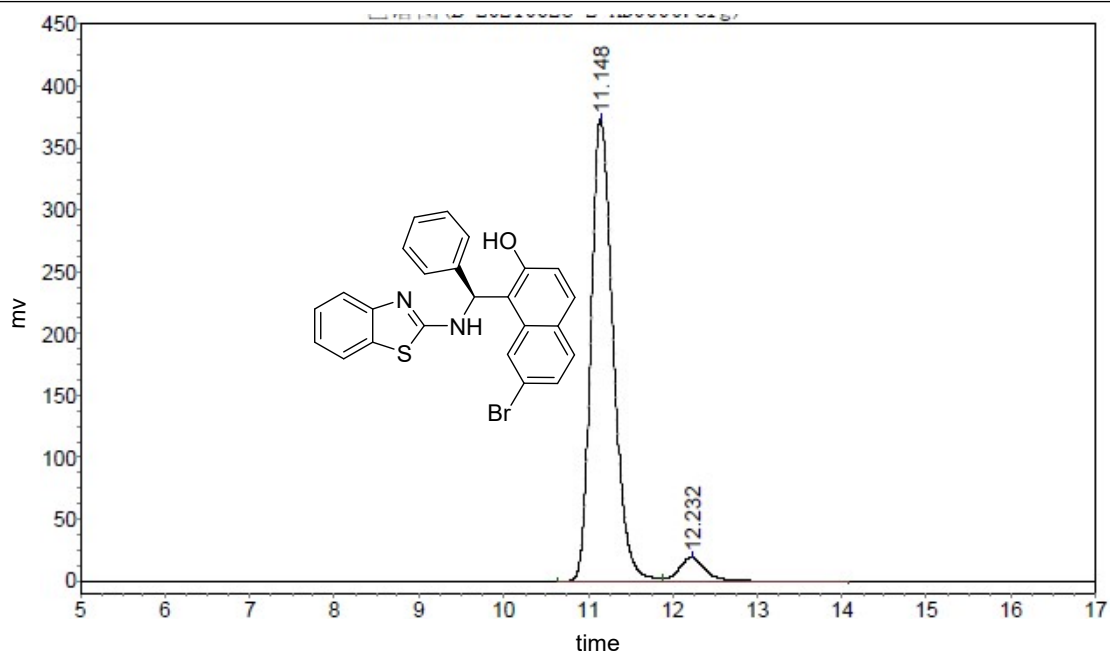

| Peak# | Ret. Time (min) | Height (mV*sec) | Area (mv)   | Area (%) |
|-------|-----------------|-----------------|-------------|----------|
| 1     | 11.148          | 372138.438      | 6790832.000 | 94.2629  |
| 2     | 12.232          | 19061.492       | 413304.781  | 5.7370   |

**3ad**

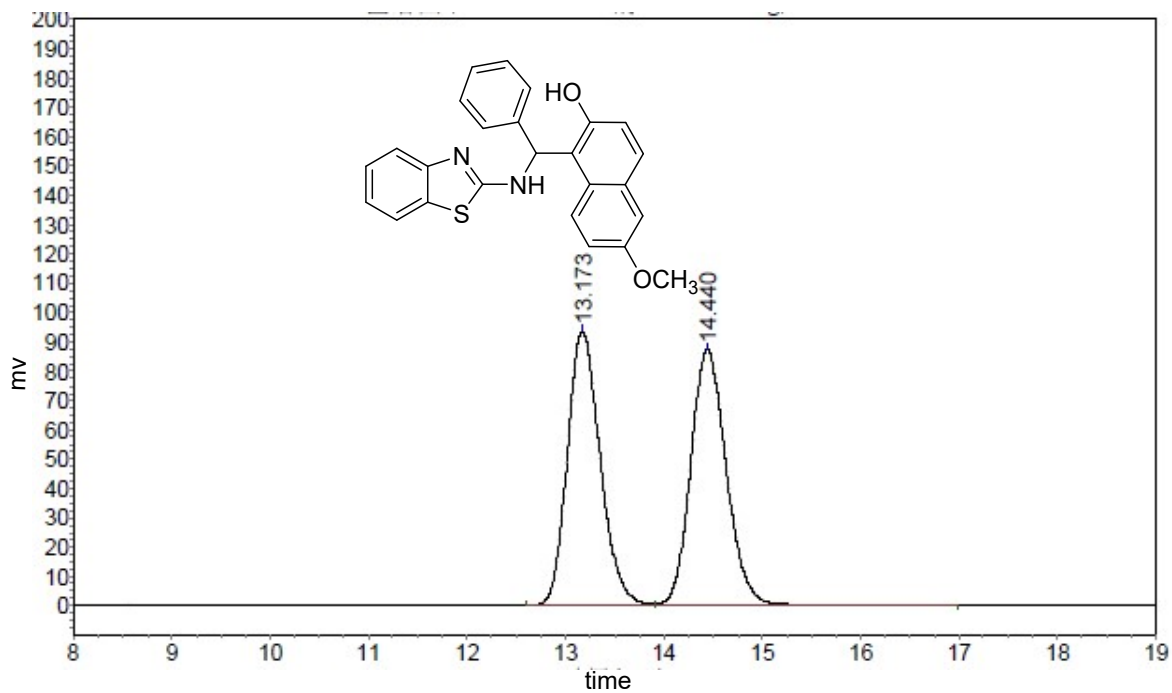

| Peak# | Ret. Time (min) | Height (mV*sec) | Area (mv)   | Area (%) |
|-------|-----------------|-----------------|-------------|----------|
| 1     | 13.173          | 93075.500       | 2179968.750 | 49.7349  |
| 2     | 14.440          | 86897.664       | 2203204.000 | 50.2650  |

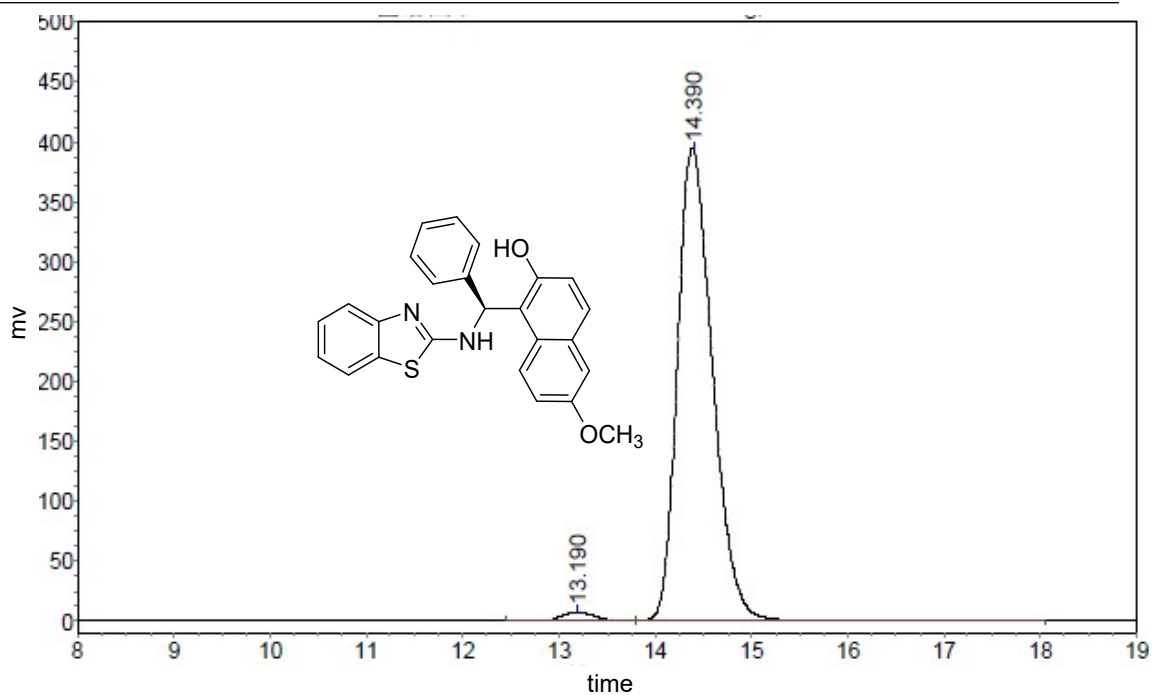

| Peak# | Ret. Time (min) | Height (mV*sec) | Area (mv)    | Area (%) |
|-------|-----------------|-----------------|--------------|----------|
| 1     | 13.190          | 7578.833        | 172744.563   | 1.6980   |
| 2     | 14.390          | 394714.844      | 10000522.000 | 98.3020  |

3ae

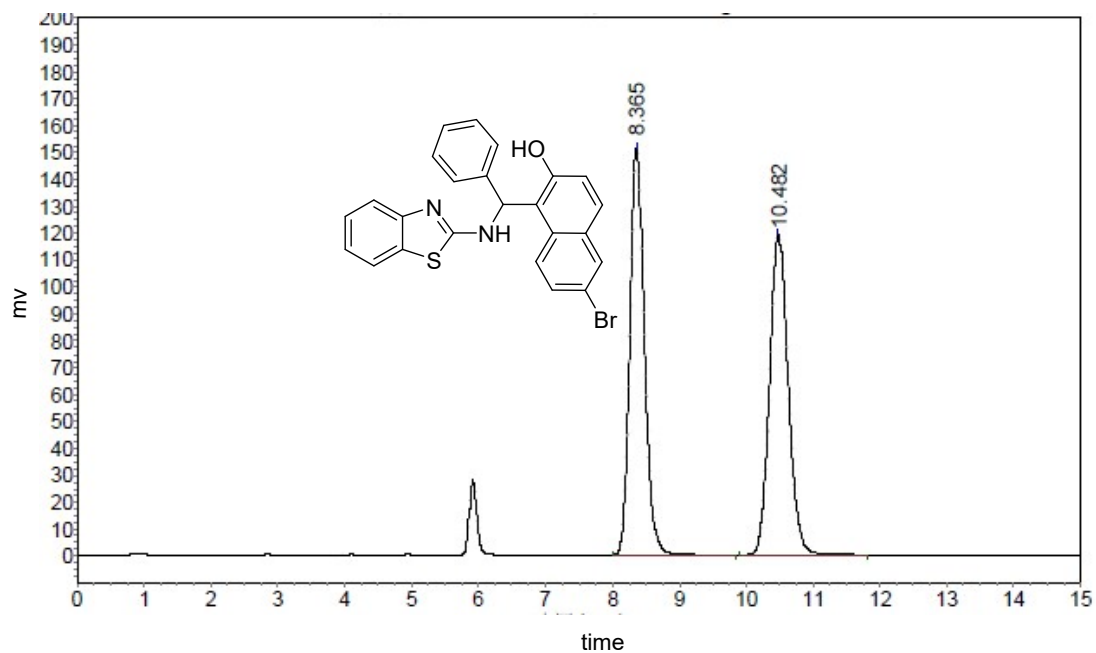

| Peak# | Ret. Time (min) | Height (mV*sec) | Area (mv)   | Area (%) |
|-------|-----------------|-----------------|-------------|----------|
| 1     | 8.365           | 151563.734      | 2307079.750 | 49.8155  |
| 2     | 10.482          | 119015.297      | 2324170.250 | 50.1845  |

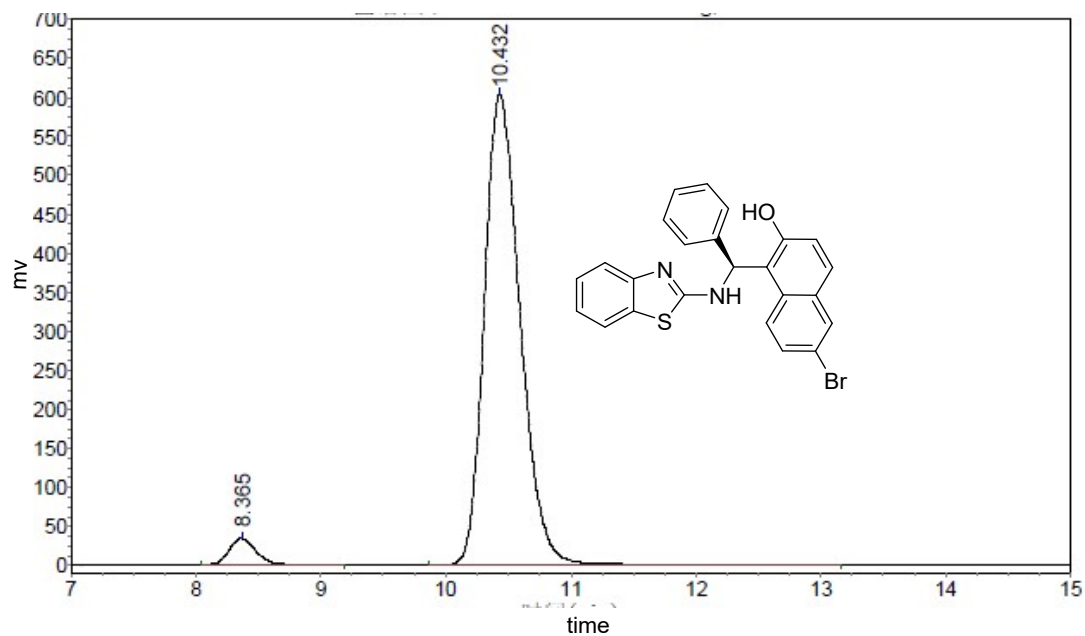

| Peak# | Ret. Time (min) | Height (mV*sec) | Area (mv)    | Area (%) |
|-------|-----------------|-----------------|--------------|----------|
| 1     | 8.365           | 34343.176       | 521081.000   | 4.1488   |
| 2     | 10.432          | 604113.500      | 12038578.000 | 95.8512  |

4 .HPLC analysis of scale-up experiment and transformations of product **3aa**  
scale-up product **3aa**

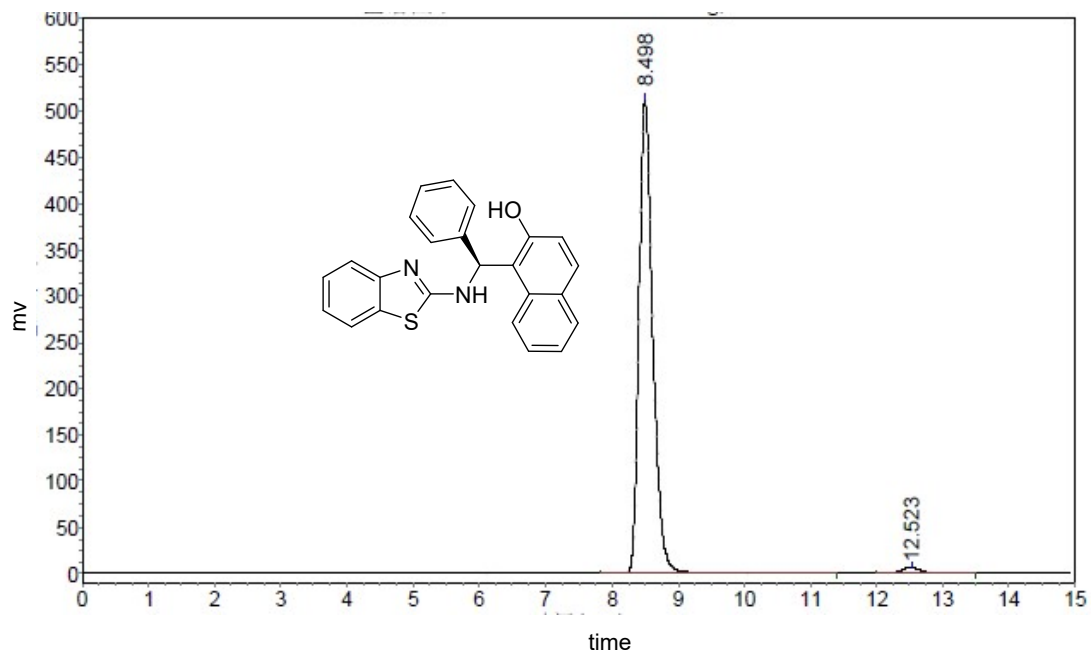

| Peak# | Ret. Time (min) | Height (mV*sec) | Area (mv)   | Area (%) |
|-------|-----------------|-----------------|-------------|----------|
| 1     | 8.498           | 513132.813      | 7450997.000 | 98.2792  |
| 2     | 12.523          | 6168.544        | 130463.898  | 1.7208   |

4

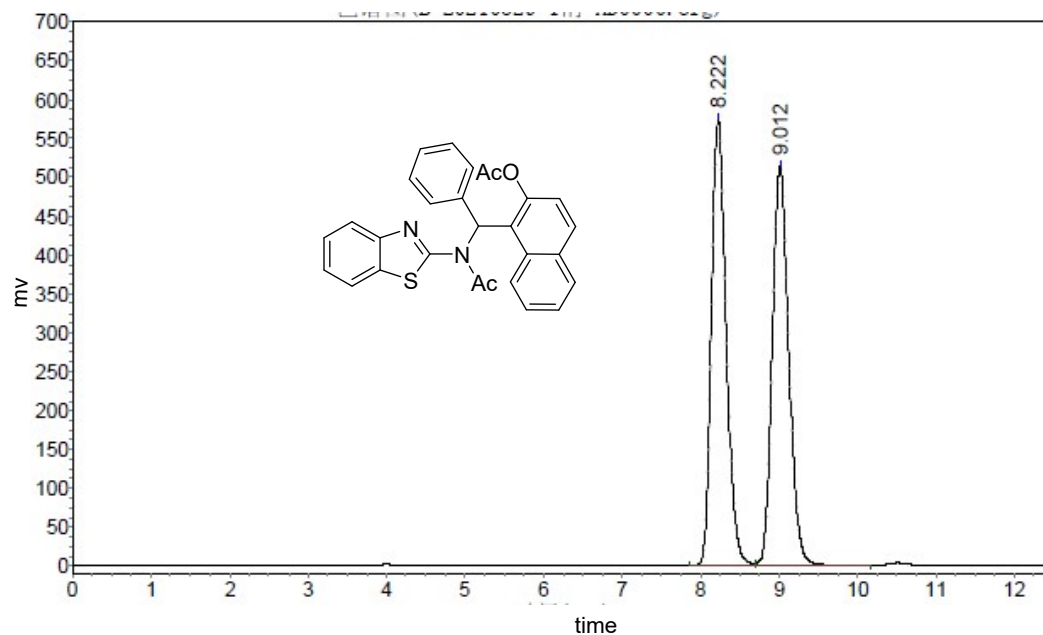

| Peak# | Ret. Time (min) | Height (mV*sec) | Area (mv)   | Area (%) |
|-------|-----------------|-----------------|-------------|----------|
| 1     | 8.222           | 575201.063      | 7479676.500 | 49.8737  |
| 2     | 9.012           | 513908.563      | 7517544.500 | 50.1263  |

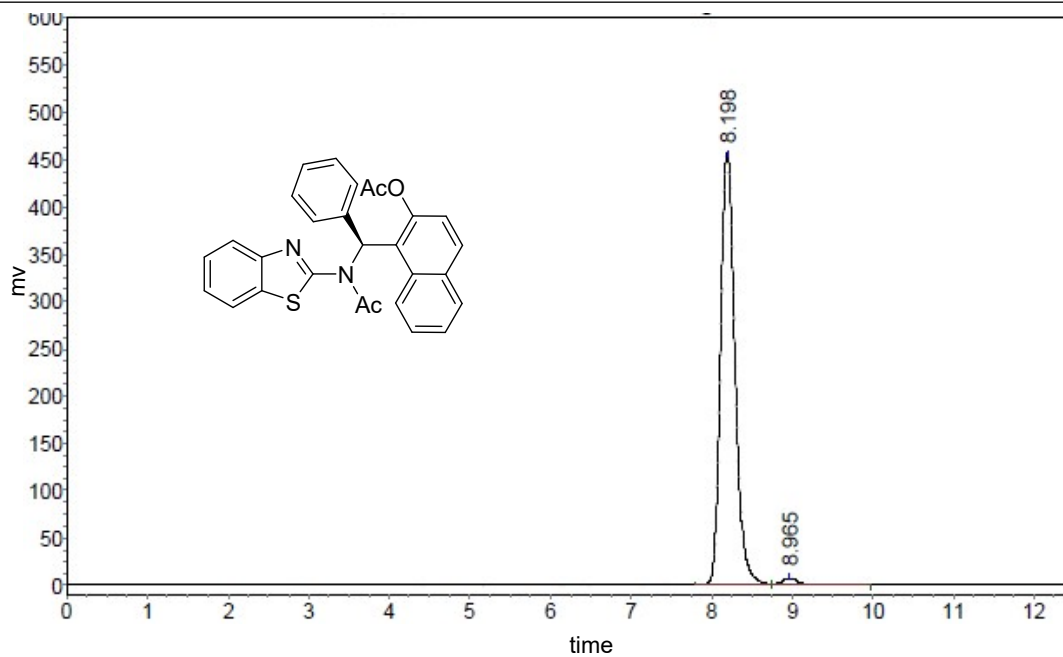

| Peak# | Ret. Time (min) | Height (mV*sec) | Area (mv)   | Area (%) |
|-------|-----------------|-----------------|-------------|----------|
| 1     | 8.198           | 455040.594      | 5659906.500 | 98.2451  |
| 2     | 8.965           | 7046.539        | 101098.102  | 1.7549   |

5

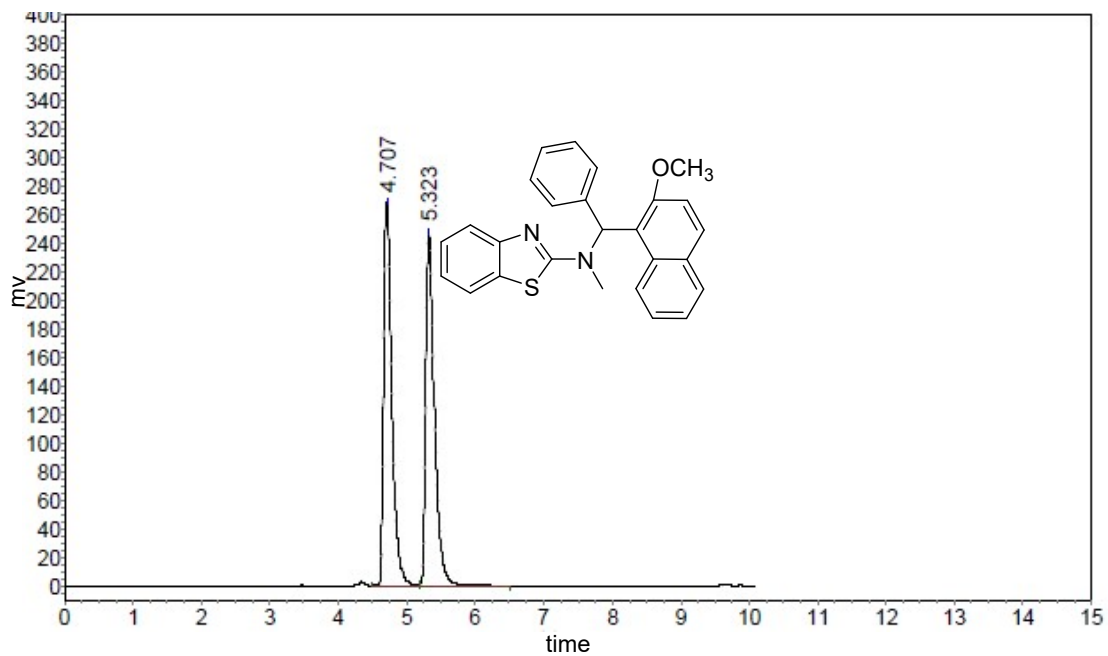

| Peak# | Ret. Time (min) | Height (mV*sec) | Area (mv)   | Area (%) |
|-------|-----------------|-----------------|-------------|----------|
| 1     | 4.707           | 268195.750      | 2171926.250 | 49.7435  |
| 2     | 5.323           | 246482.188      | 2194323.250 | 50.2565  |

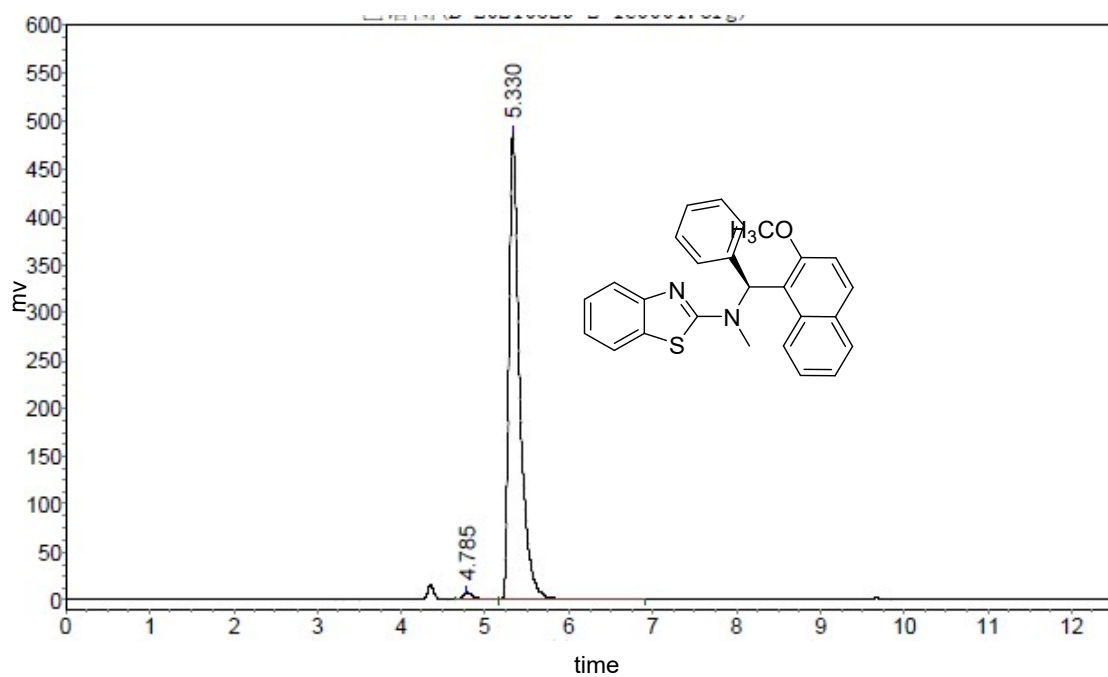

| Peak# | Ret. Time (min) | Height (mV*sec) | Area (mv)    | Area (%) |
|-------|-----------------|-----------------|--------------|----------|
| 1     | 4.785           | 7360.049        | 66226.086    | 1.4847   |
| 2     | 5.330           | 488855.438      | 12038578.000 | 98.5153  |

6

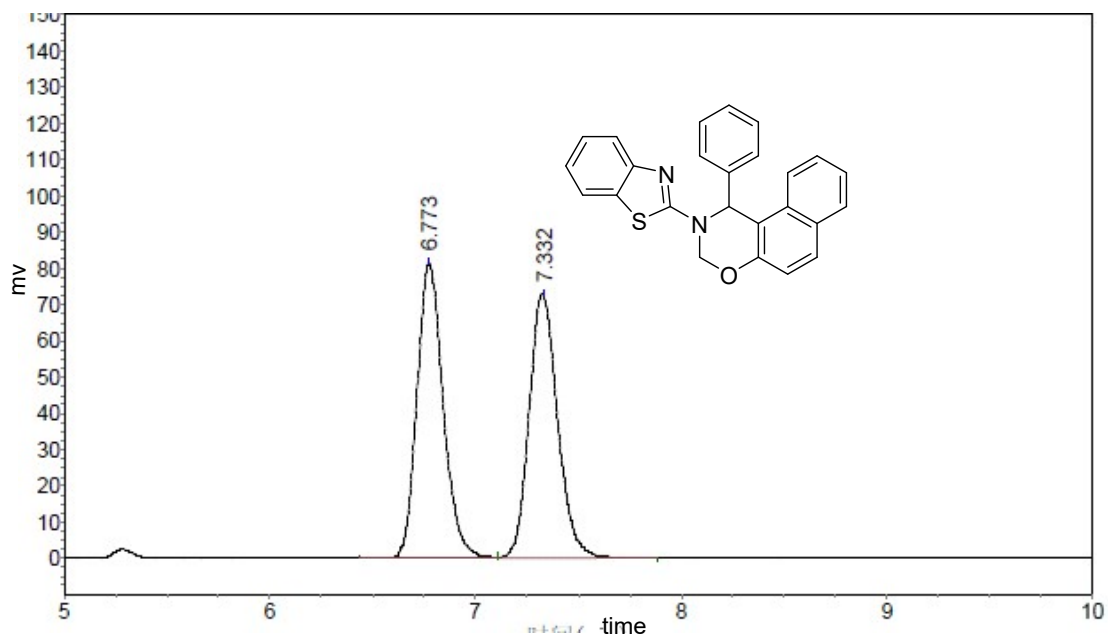

| Peak# | Ret. Time (min) | Height (mV*sec) | Area (mv)  | Area (%) |
|-------|-----------------|-----------------|------------|----------|
| 1     | 6.773           | 81186.094       | 721409.500 | 50.5644  |
| 2     | 7.332           | 72692.609       | 705306.063 | 49.4356  |

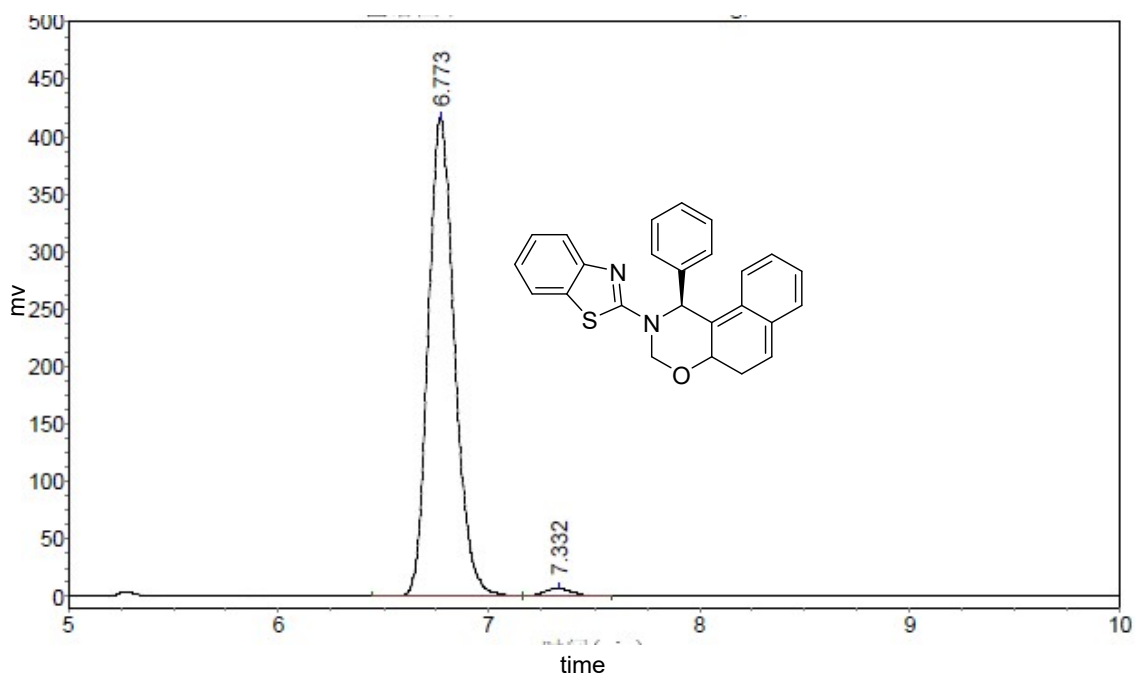

| Peak# | Ret. Time (min) | Height (mV*sec) | Area (mv)   | Area (%) |
|-------|-----------------|-----------------|-------------|----------|
| 1     | 6.773           | 416487.031      | 3620665.000 | 98.2464  |
| 2     | 7.332           | 6923.368        | 64623.594   | 1.7536   |

## 5. NMR spectra of products **3**

### **3aa**

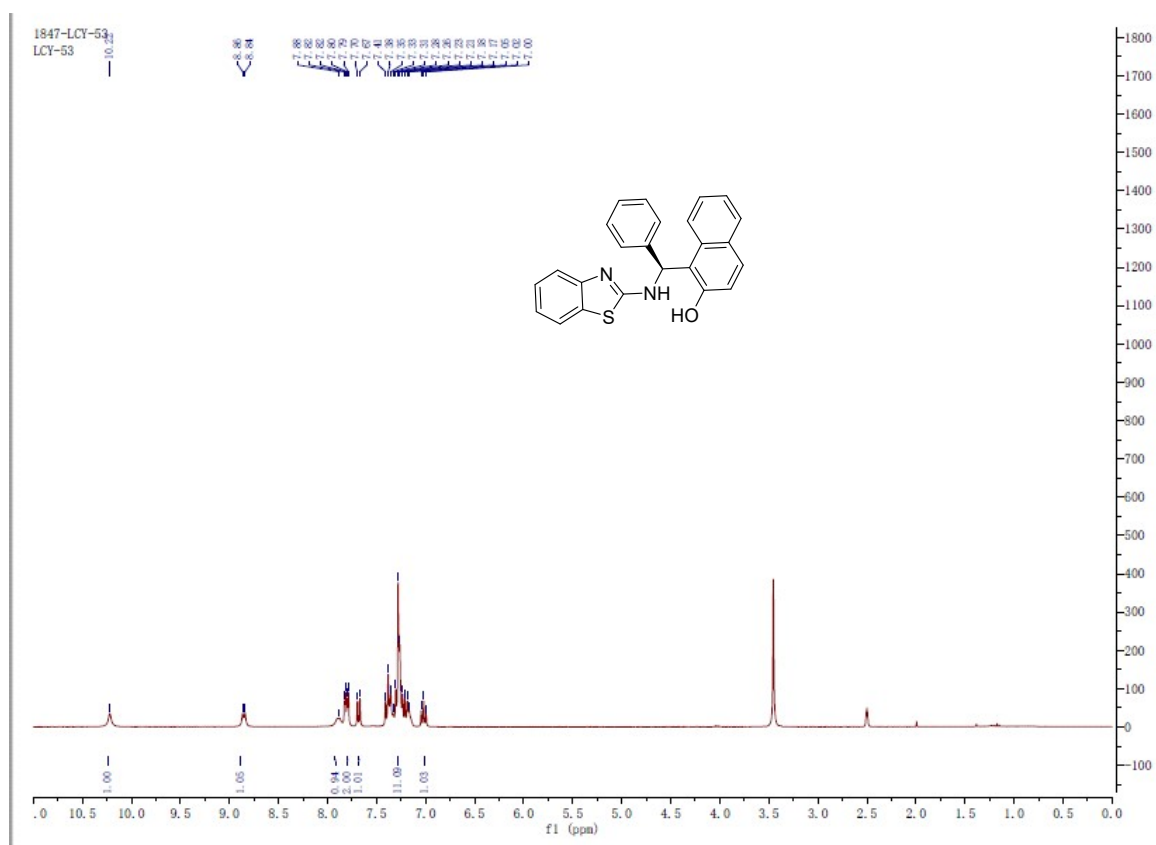



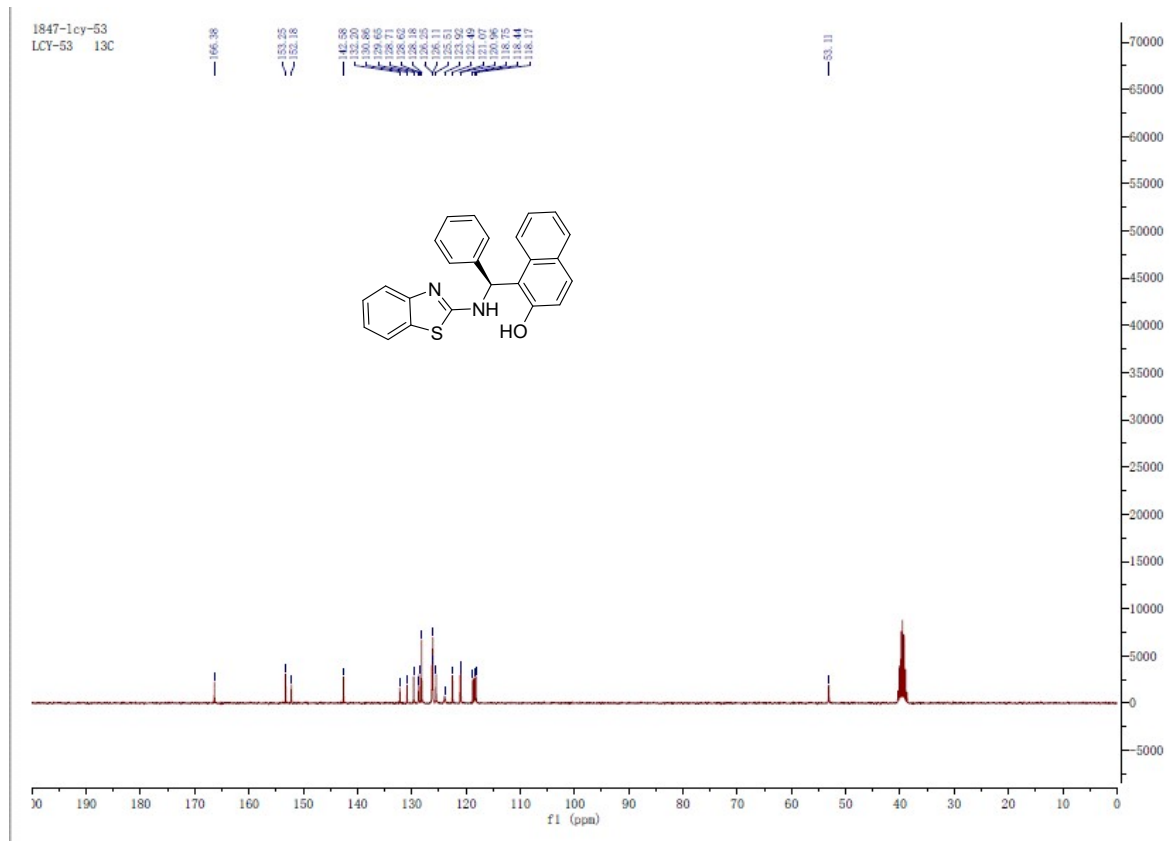

**3ba**

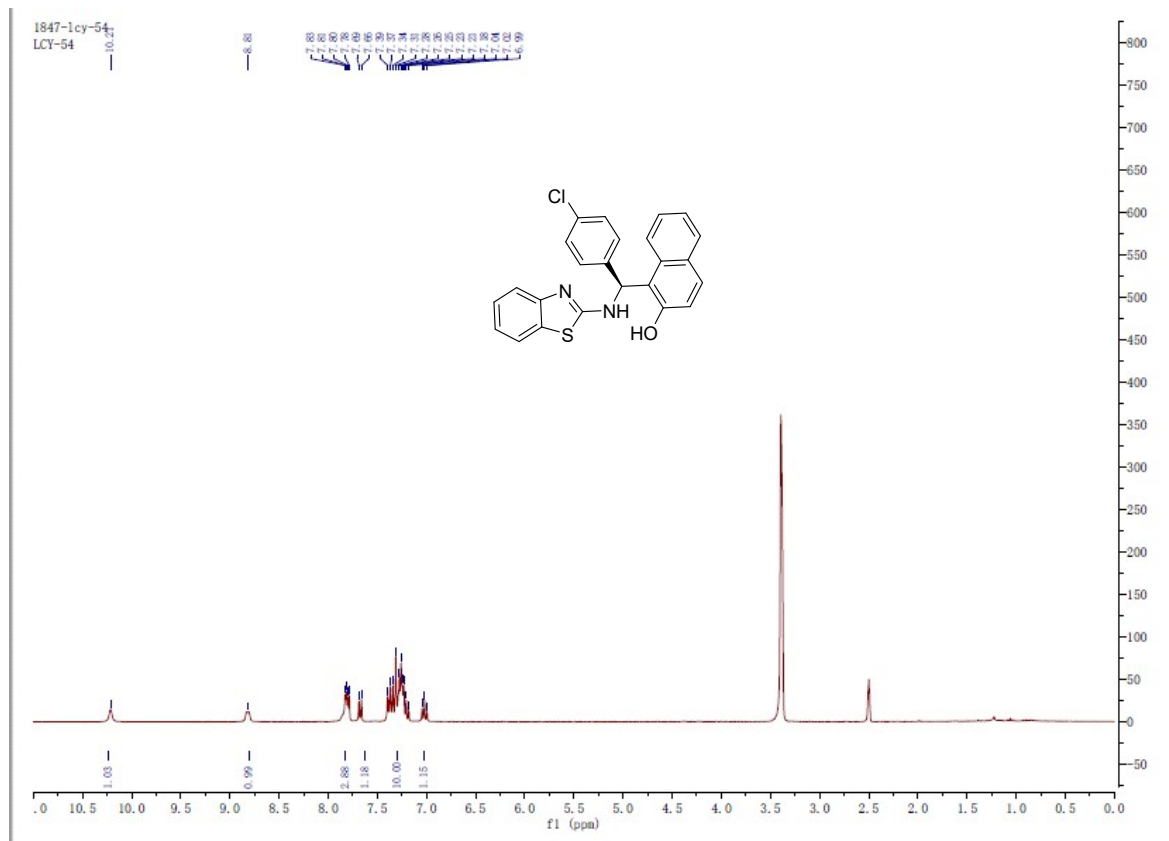

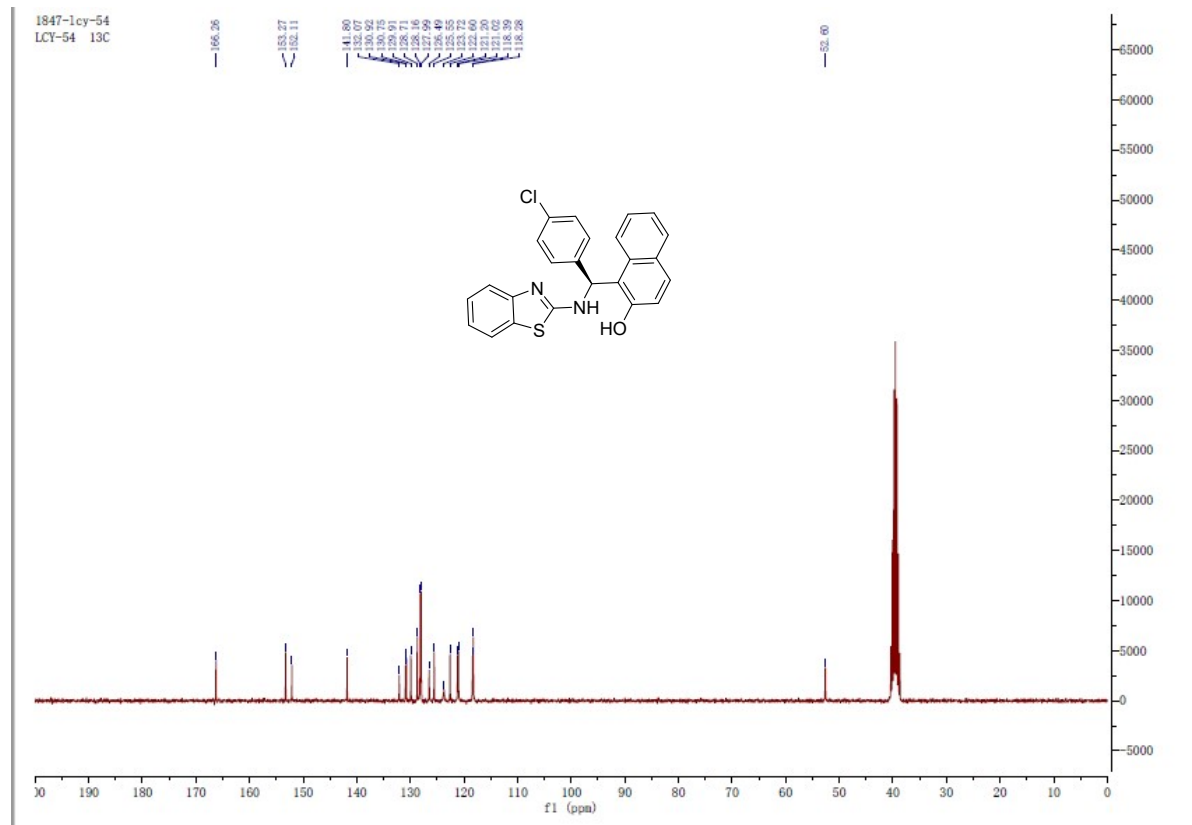

3ca

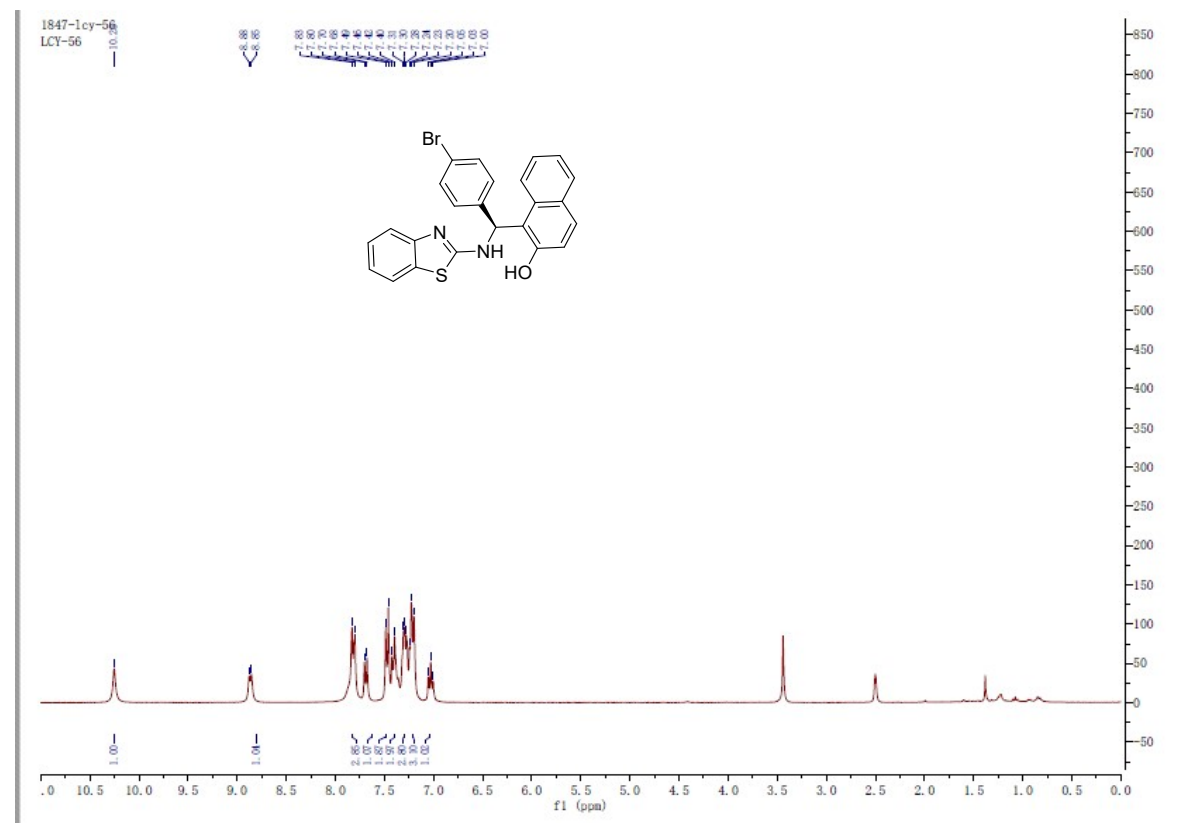

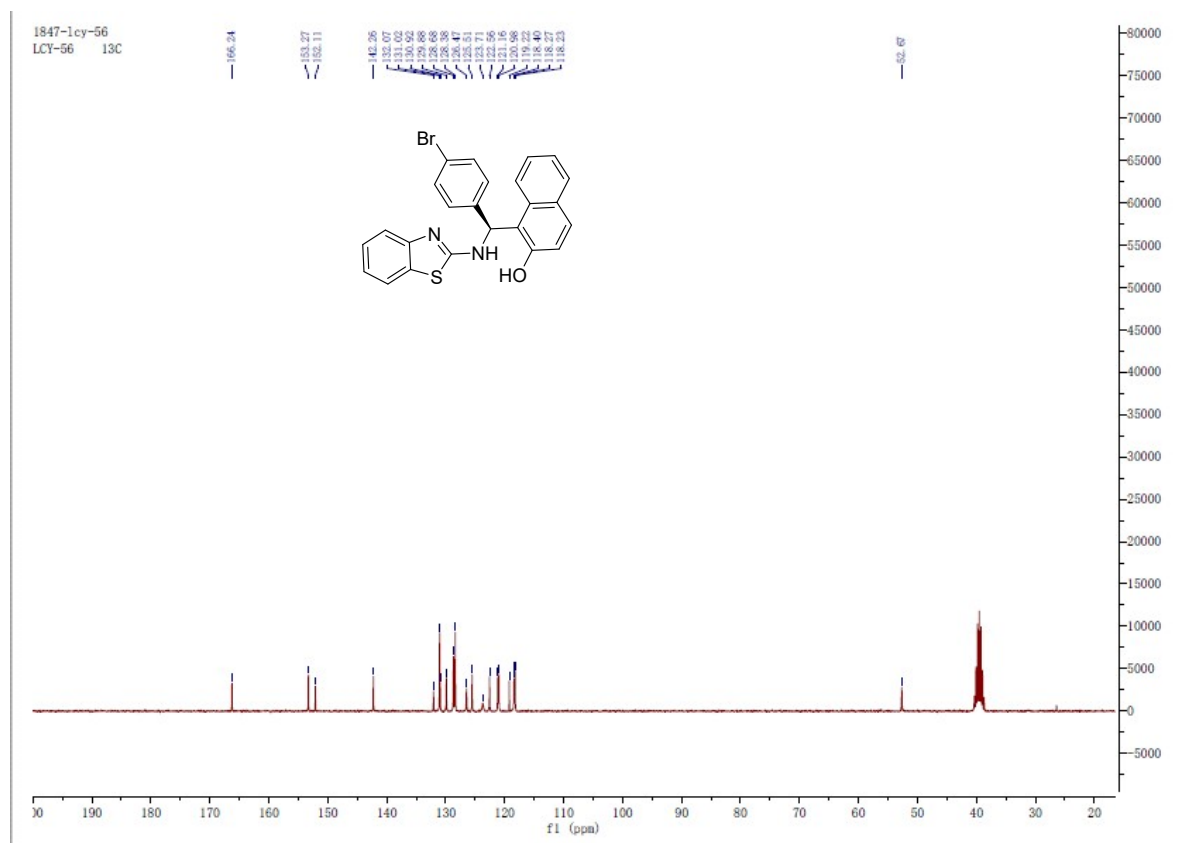

3da

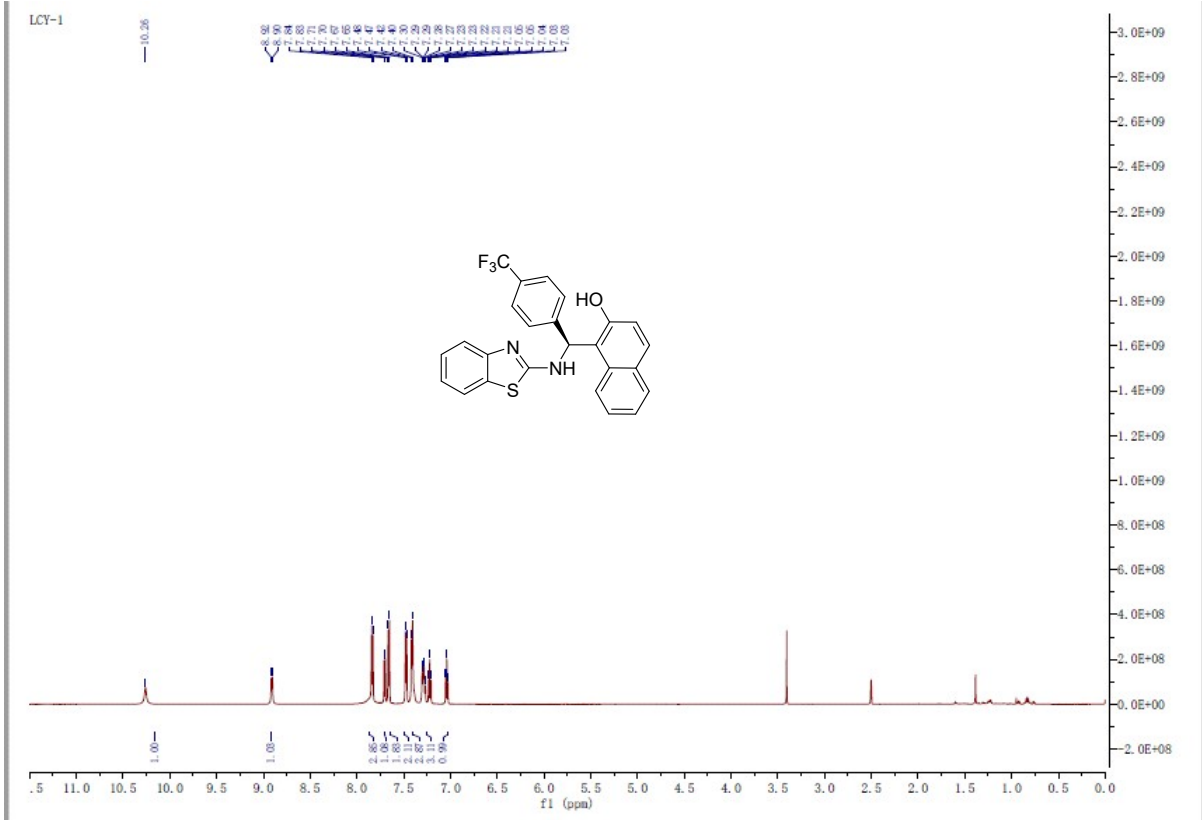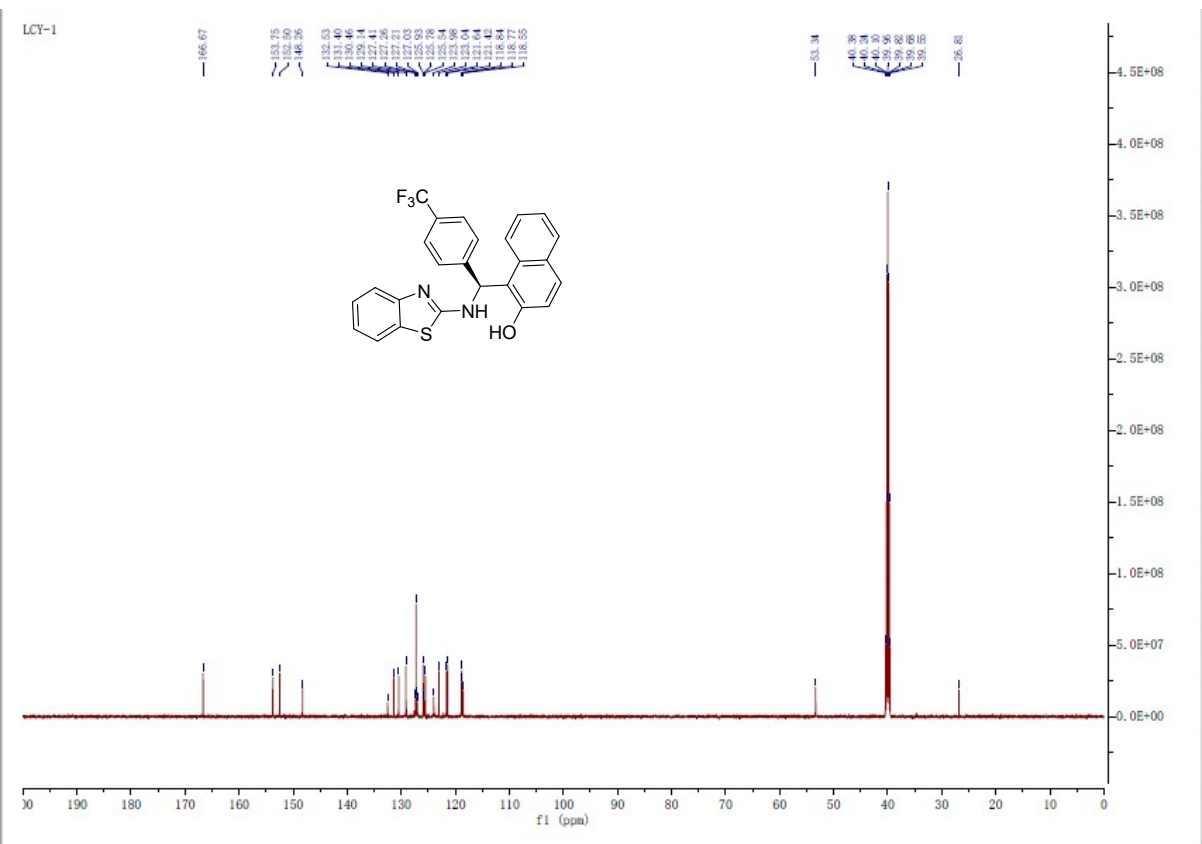

3ea

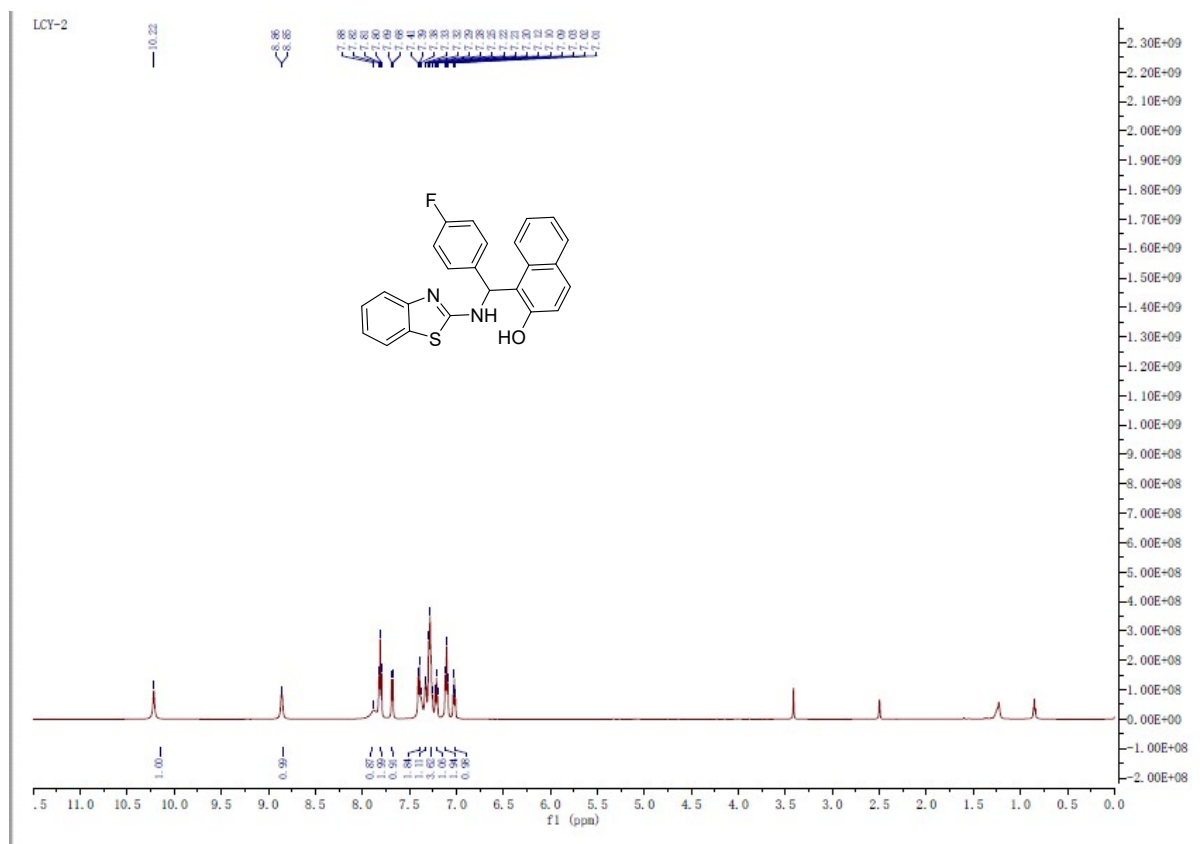

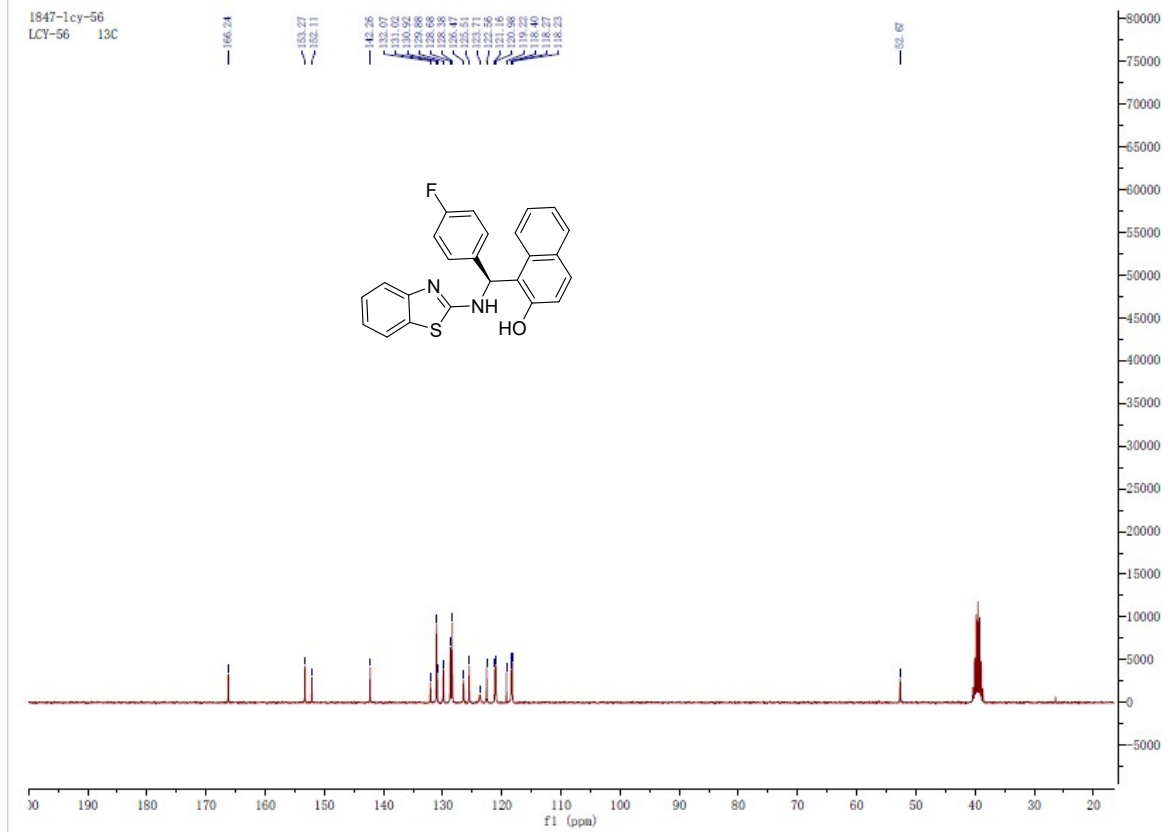

3fa

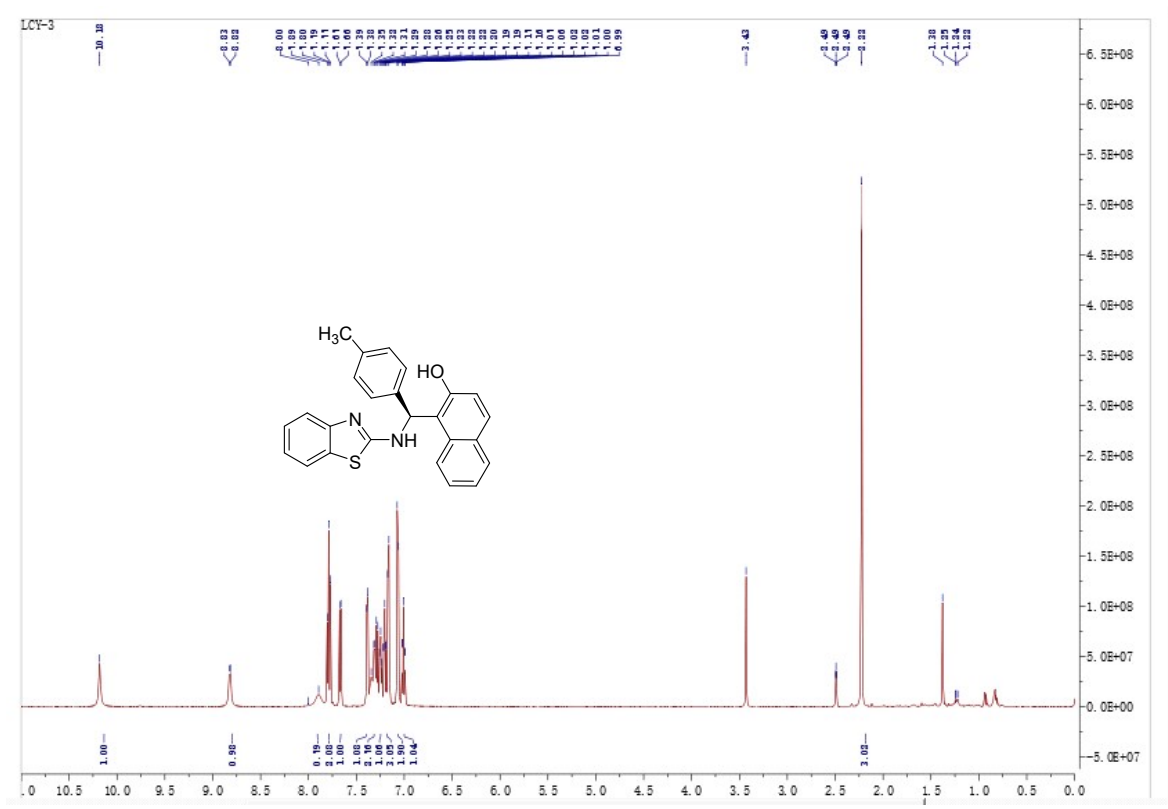

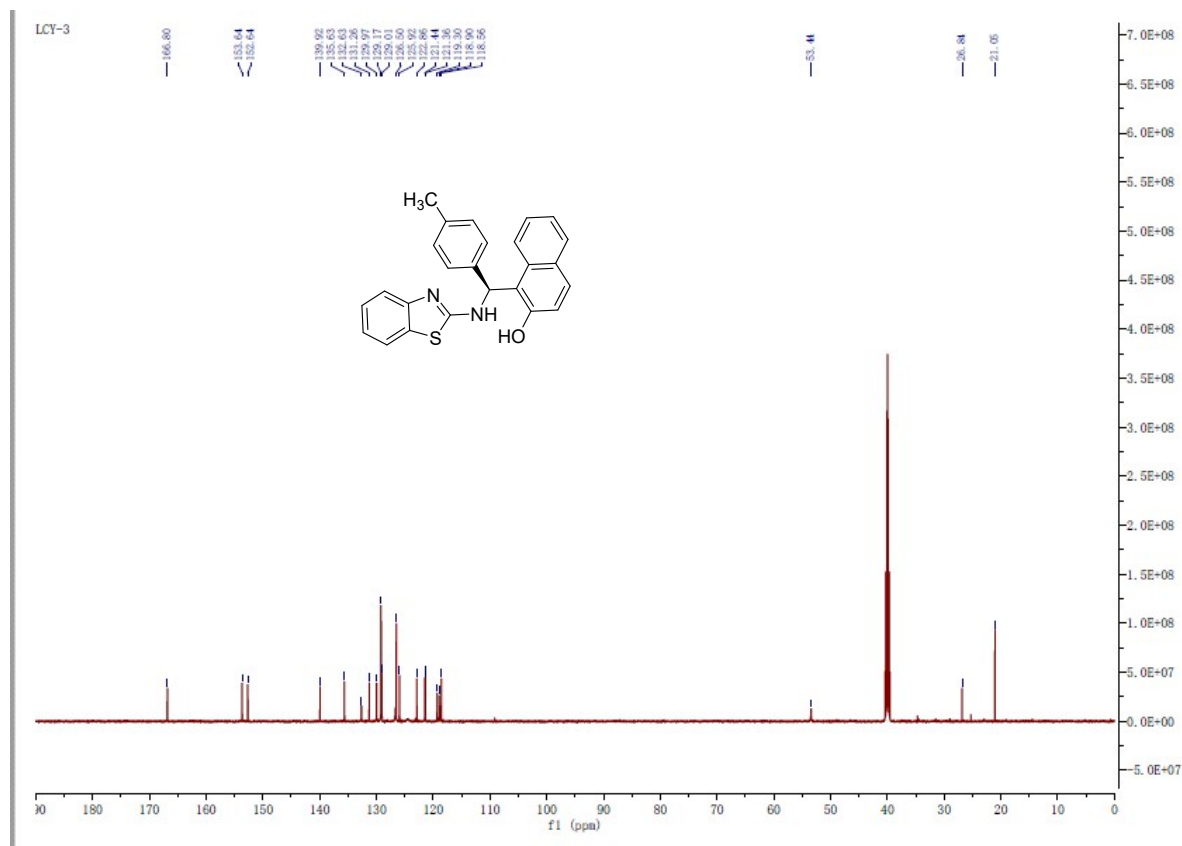

3ga

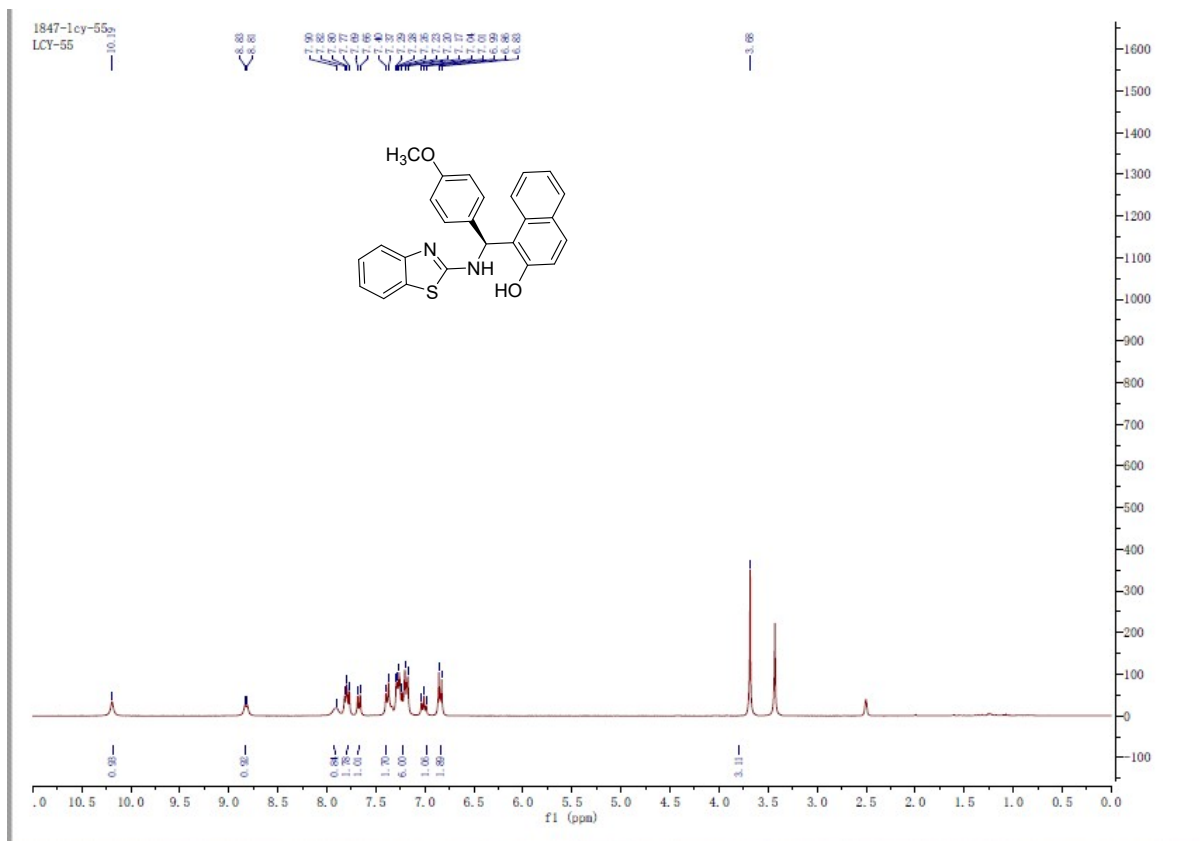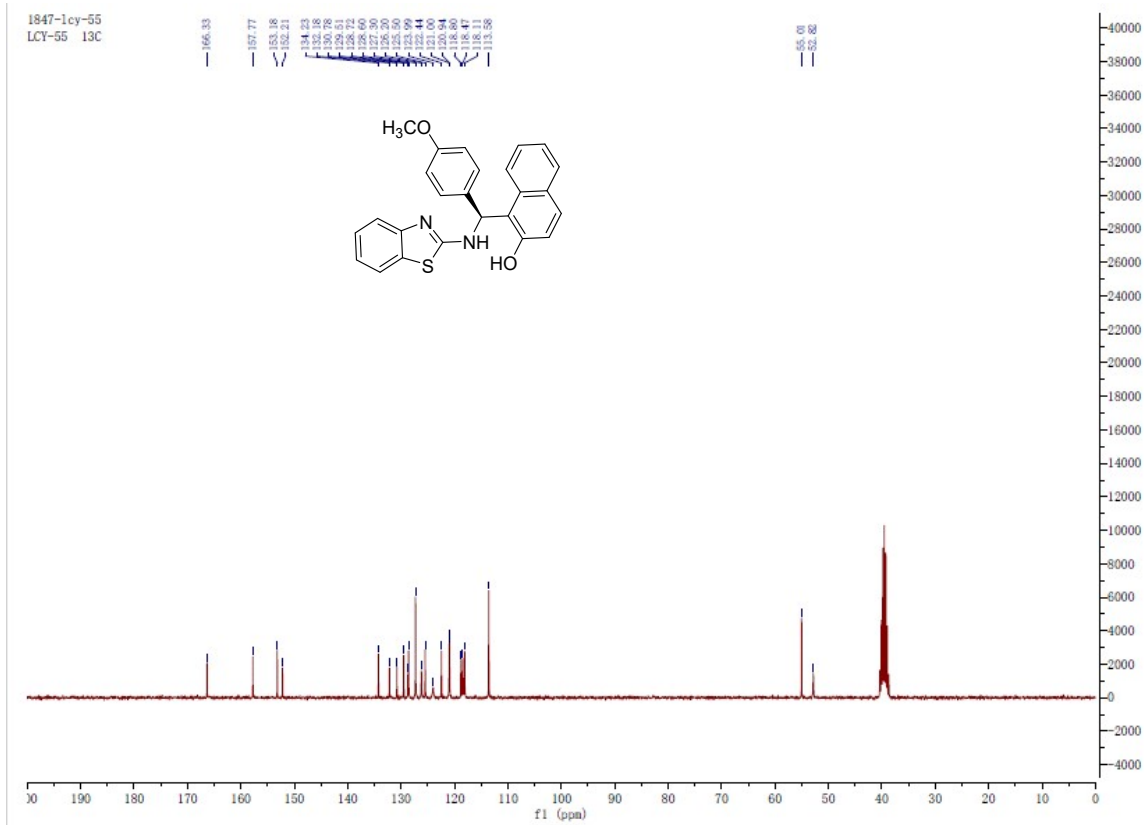



3ha

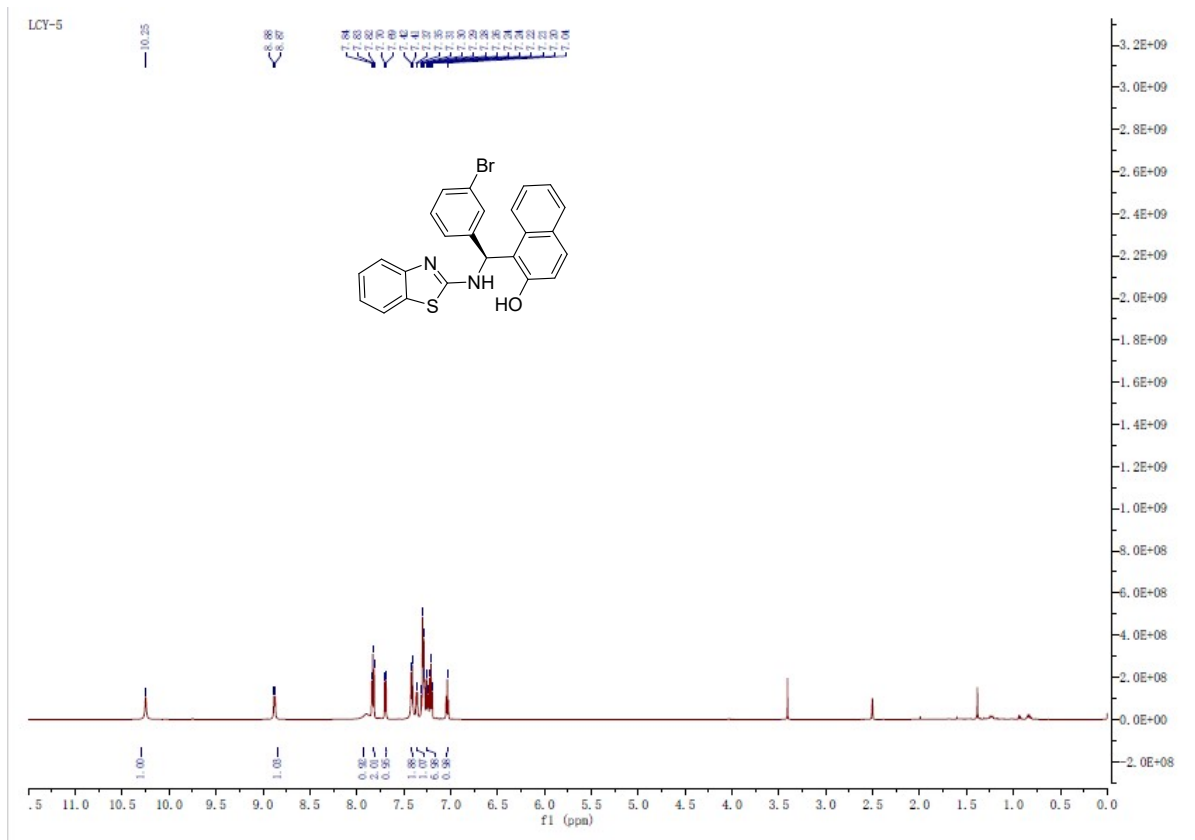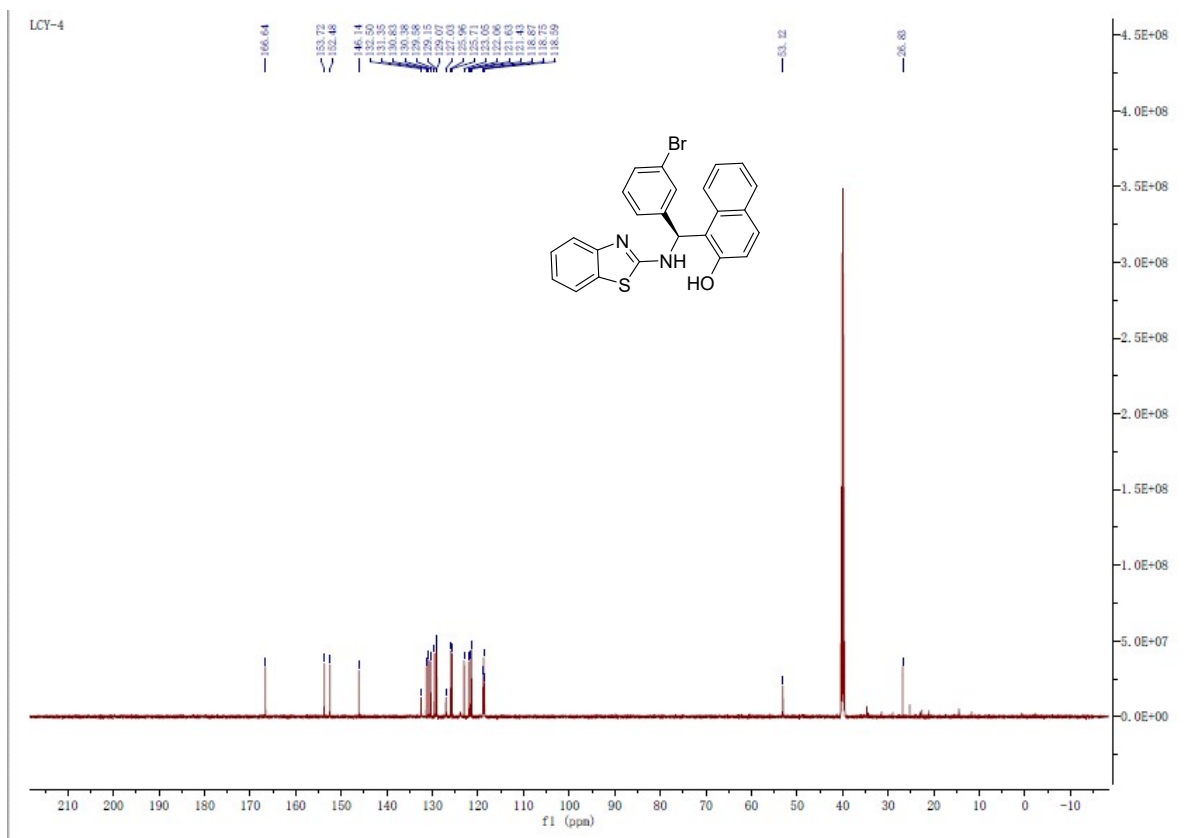



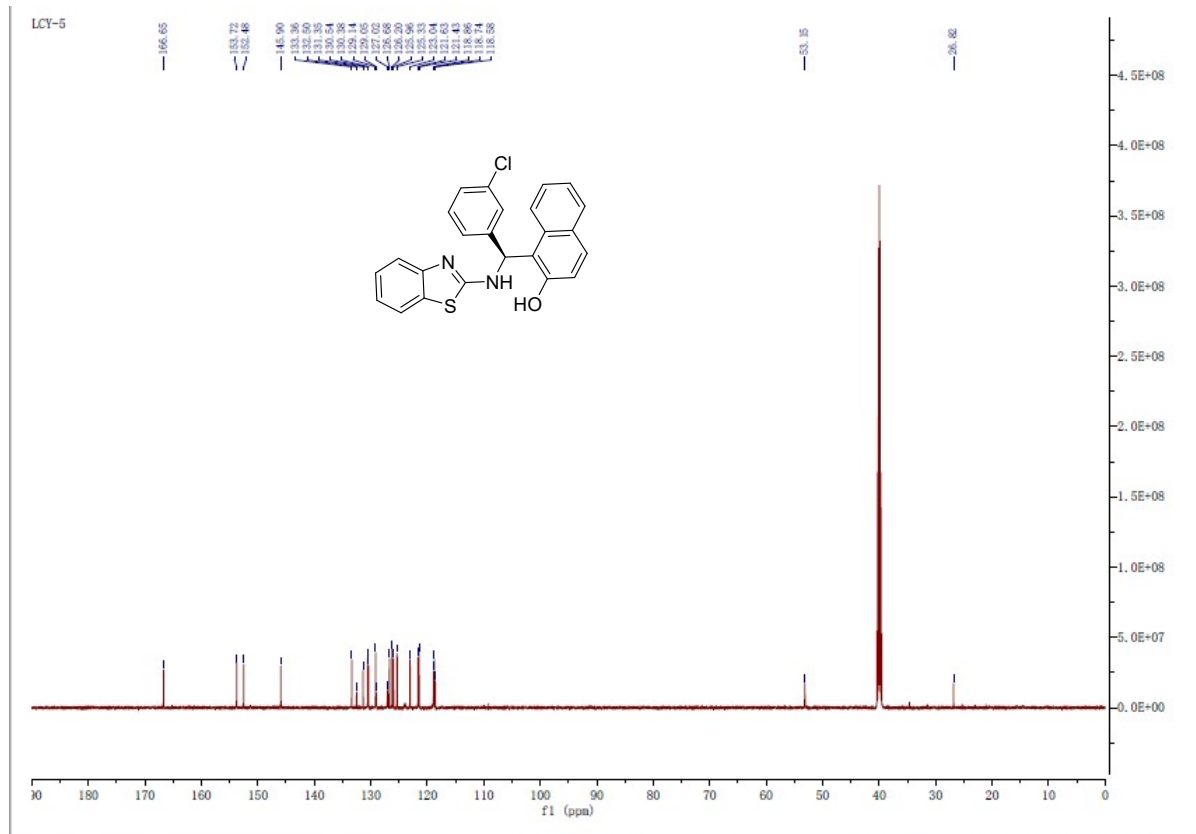

### 3ja

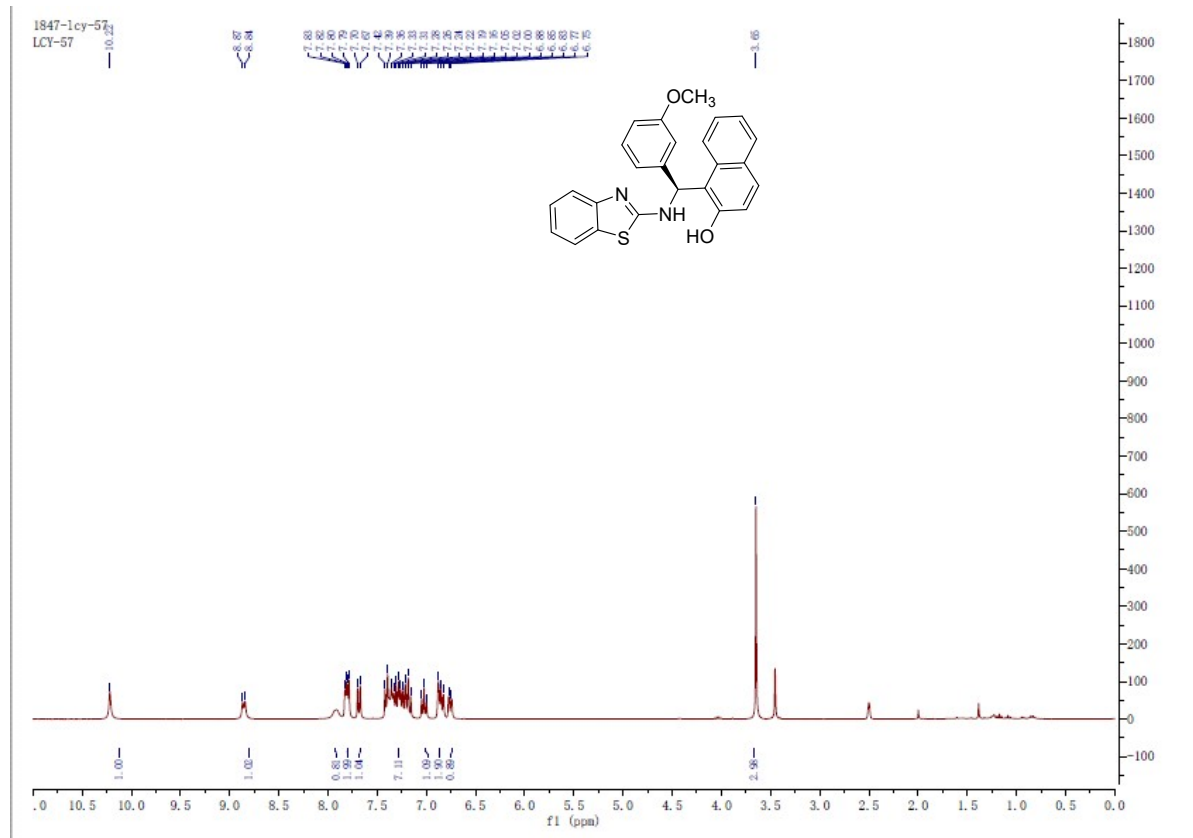

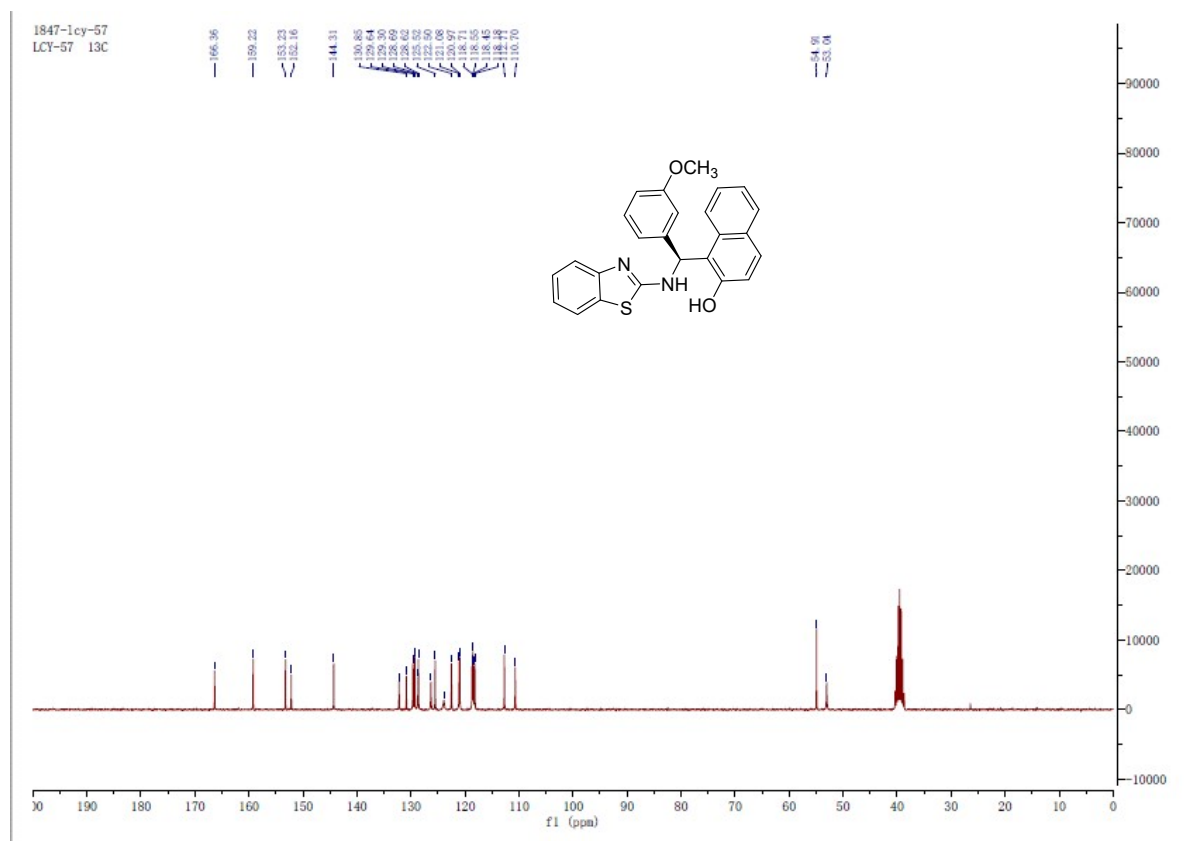

3ka

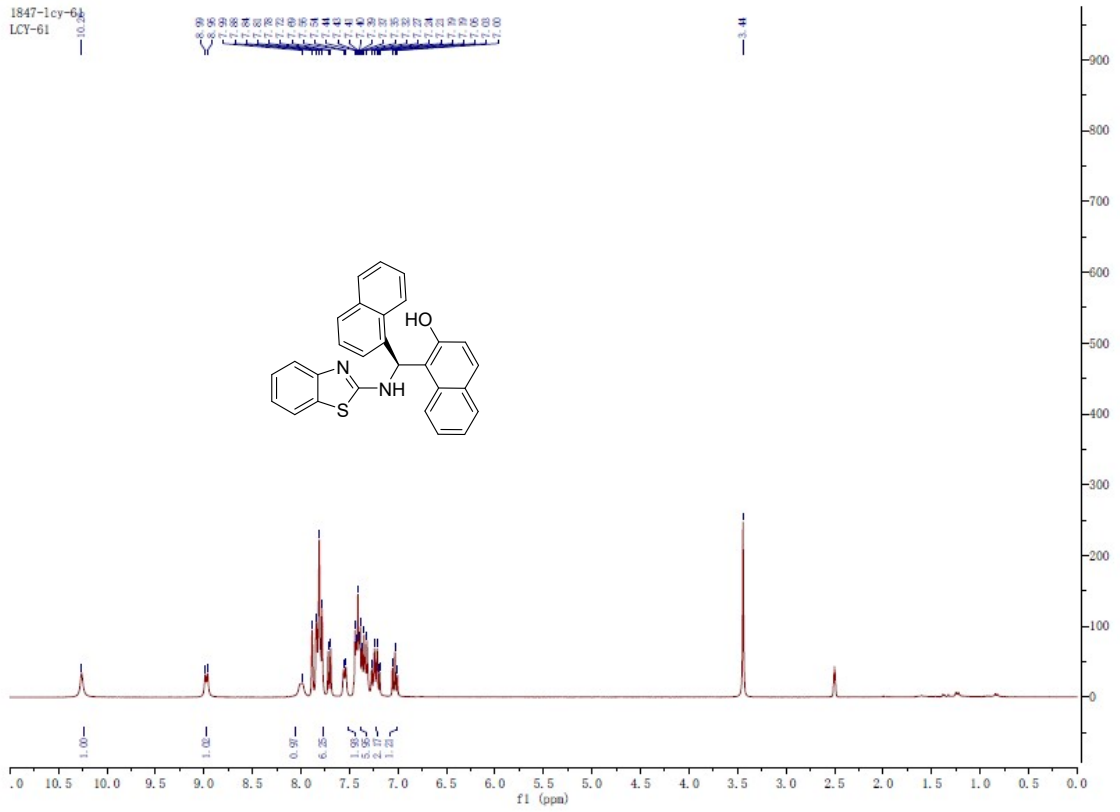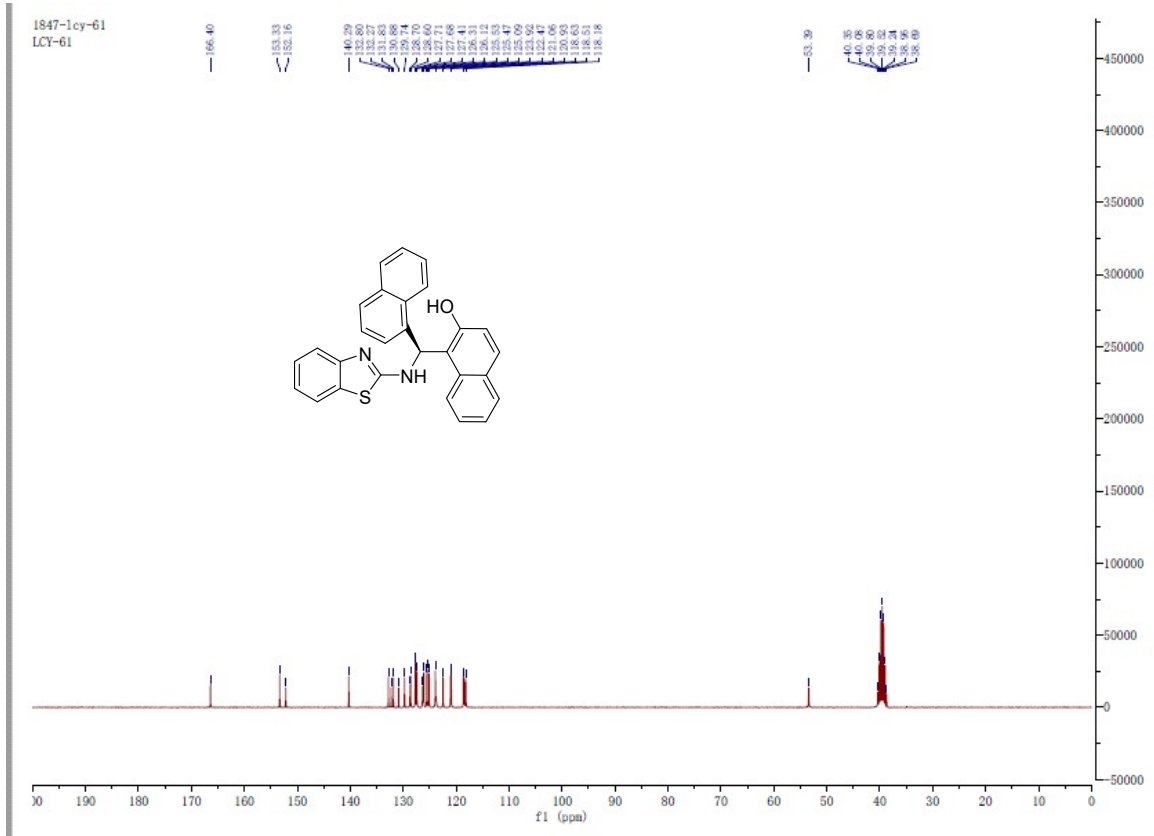



### 3ma

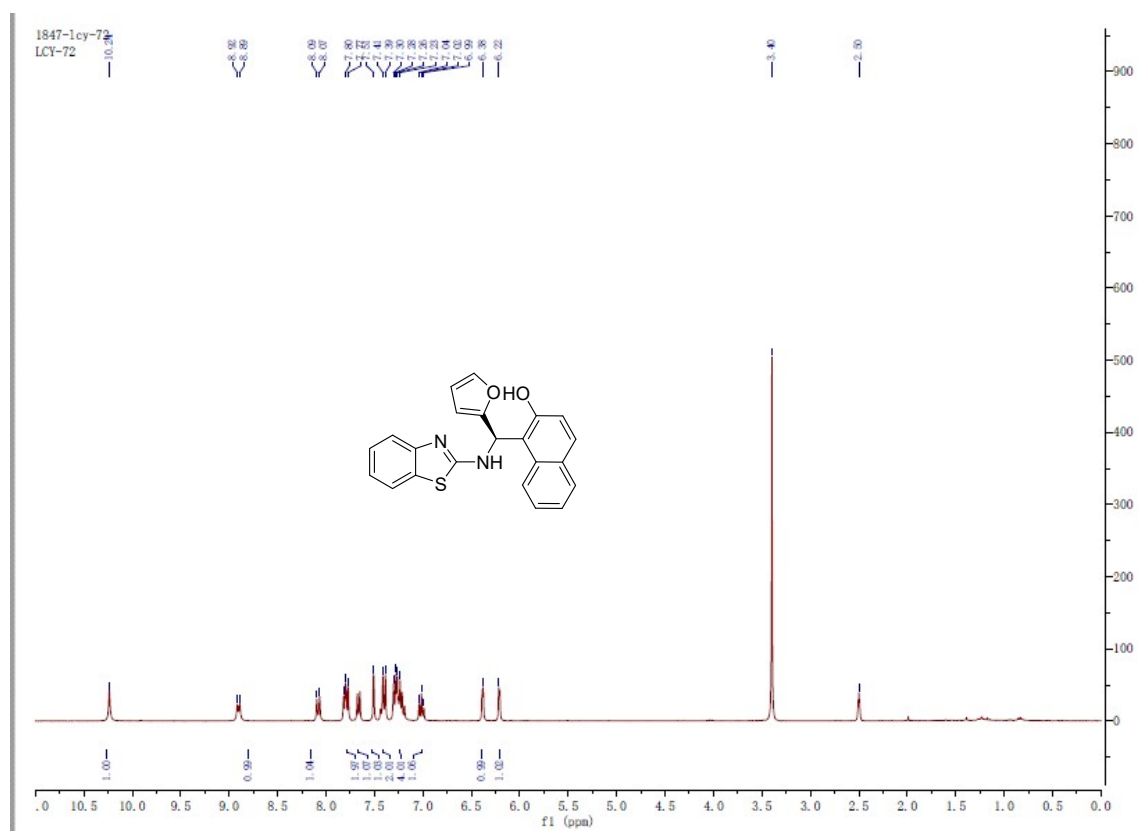

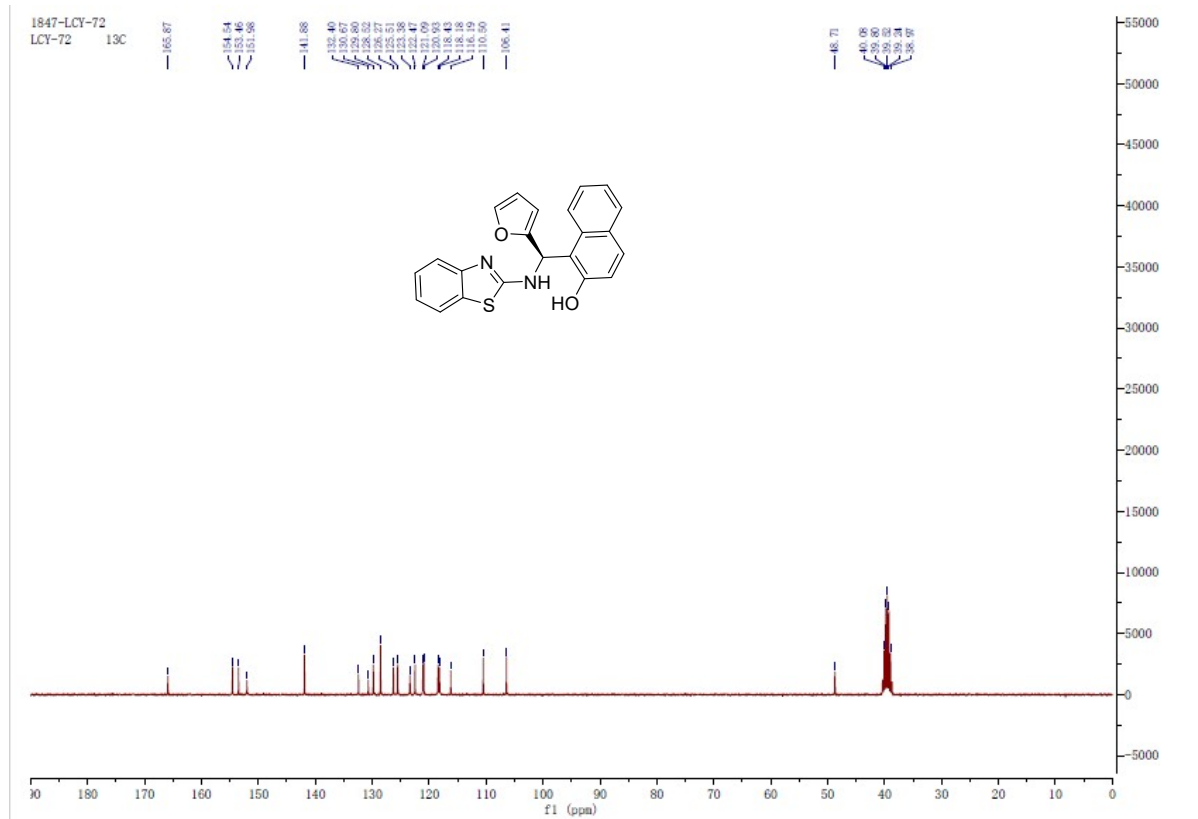

### 3na

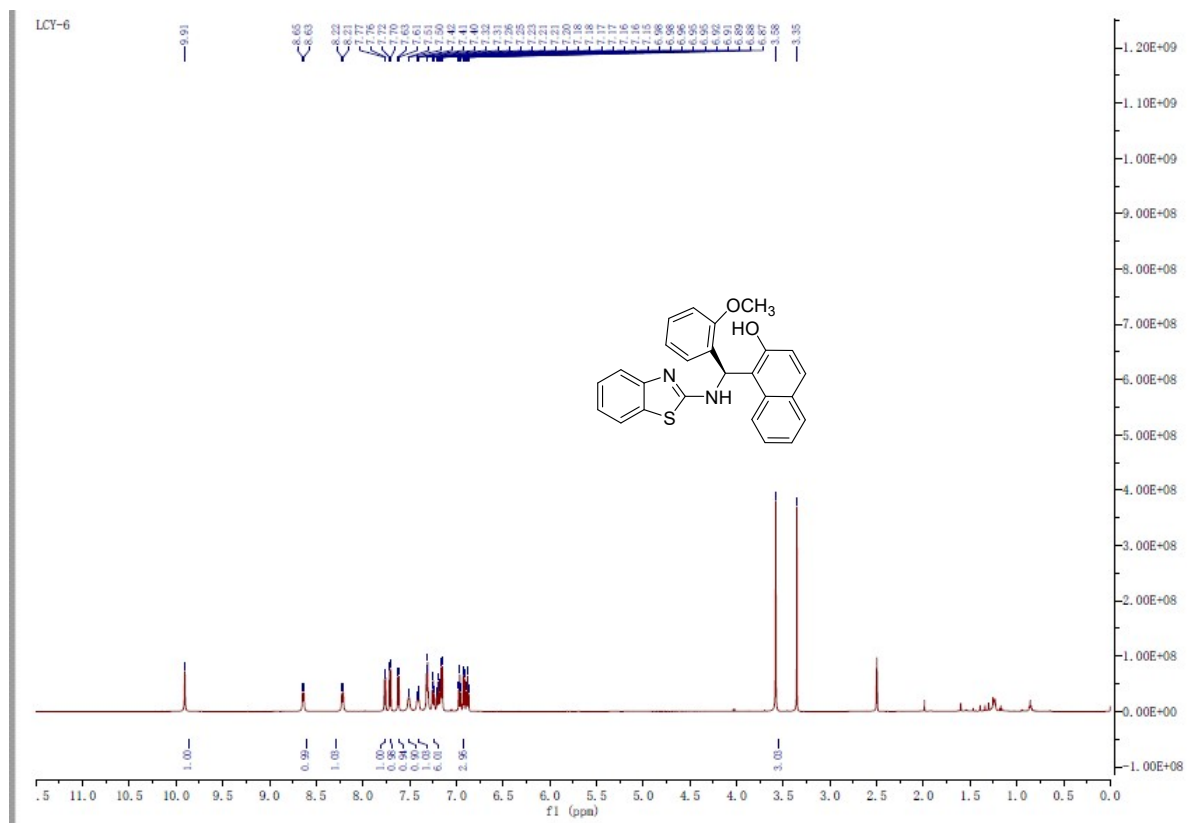



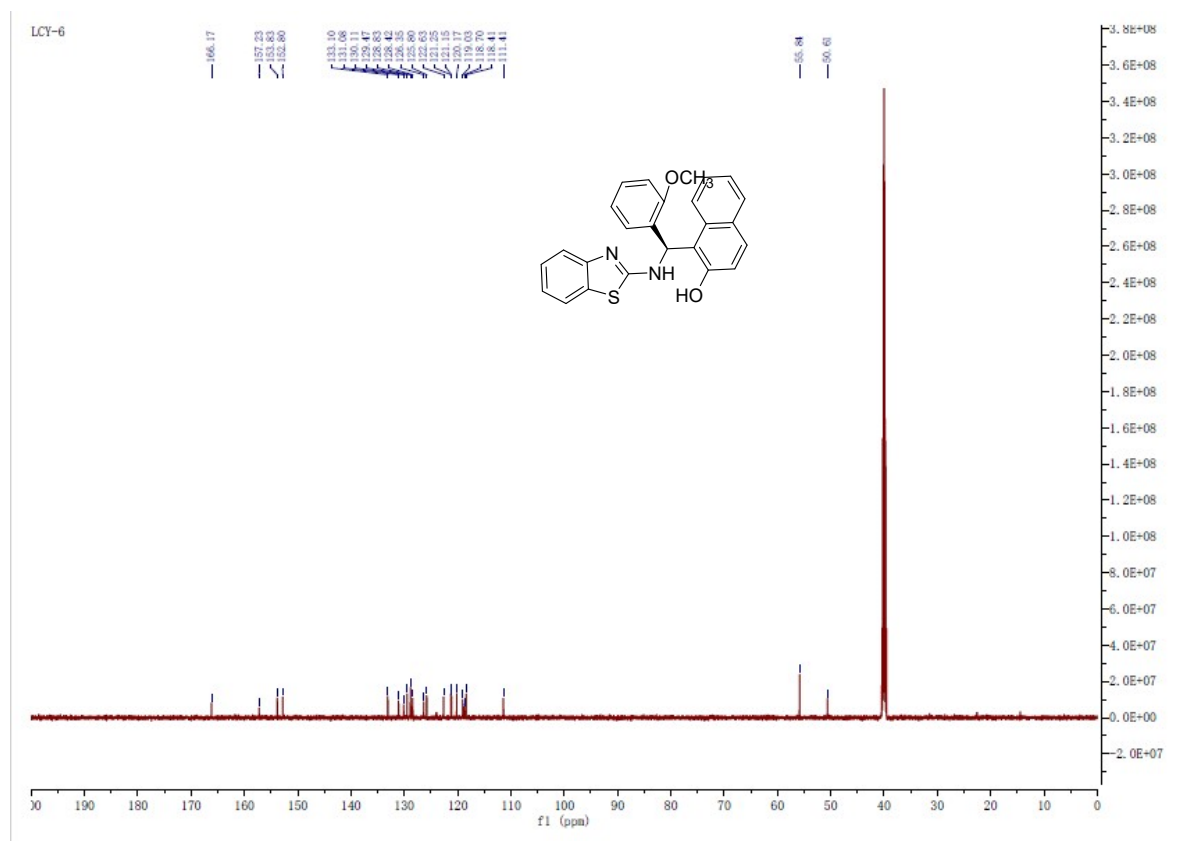

30a

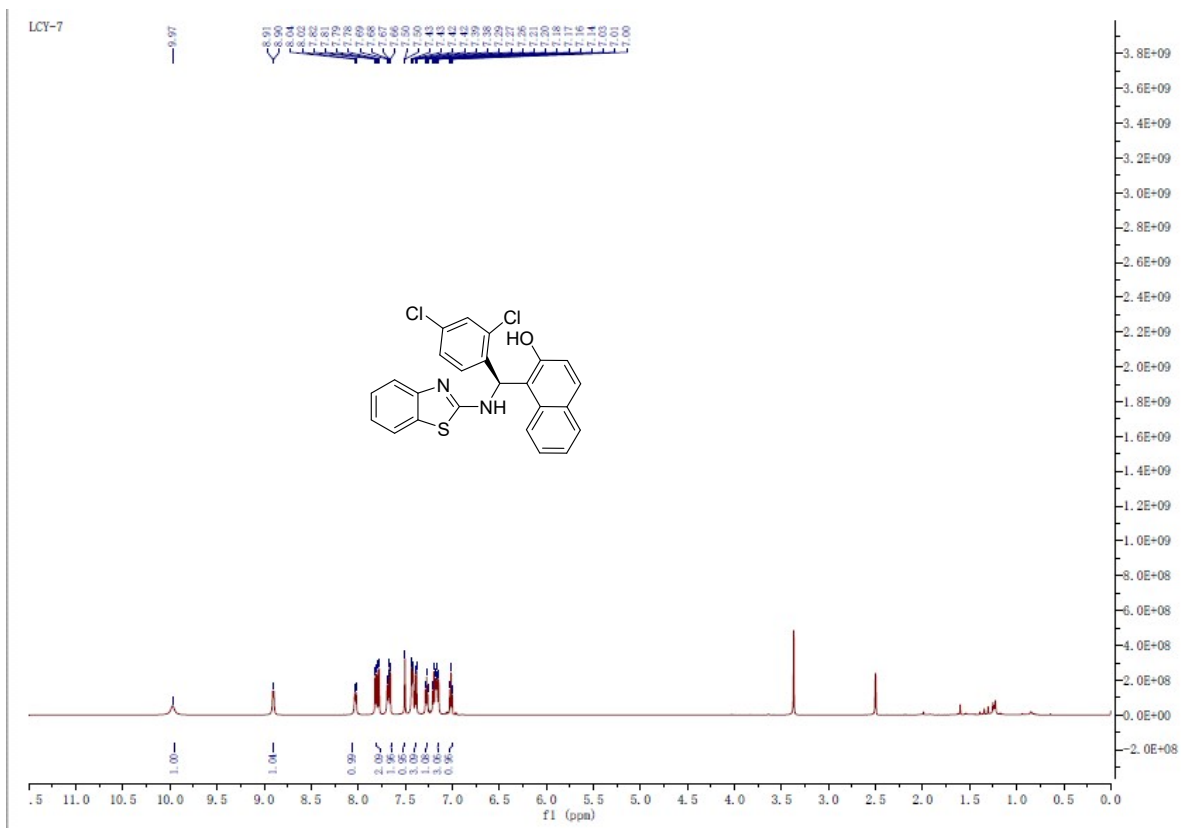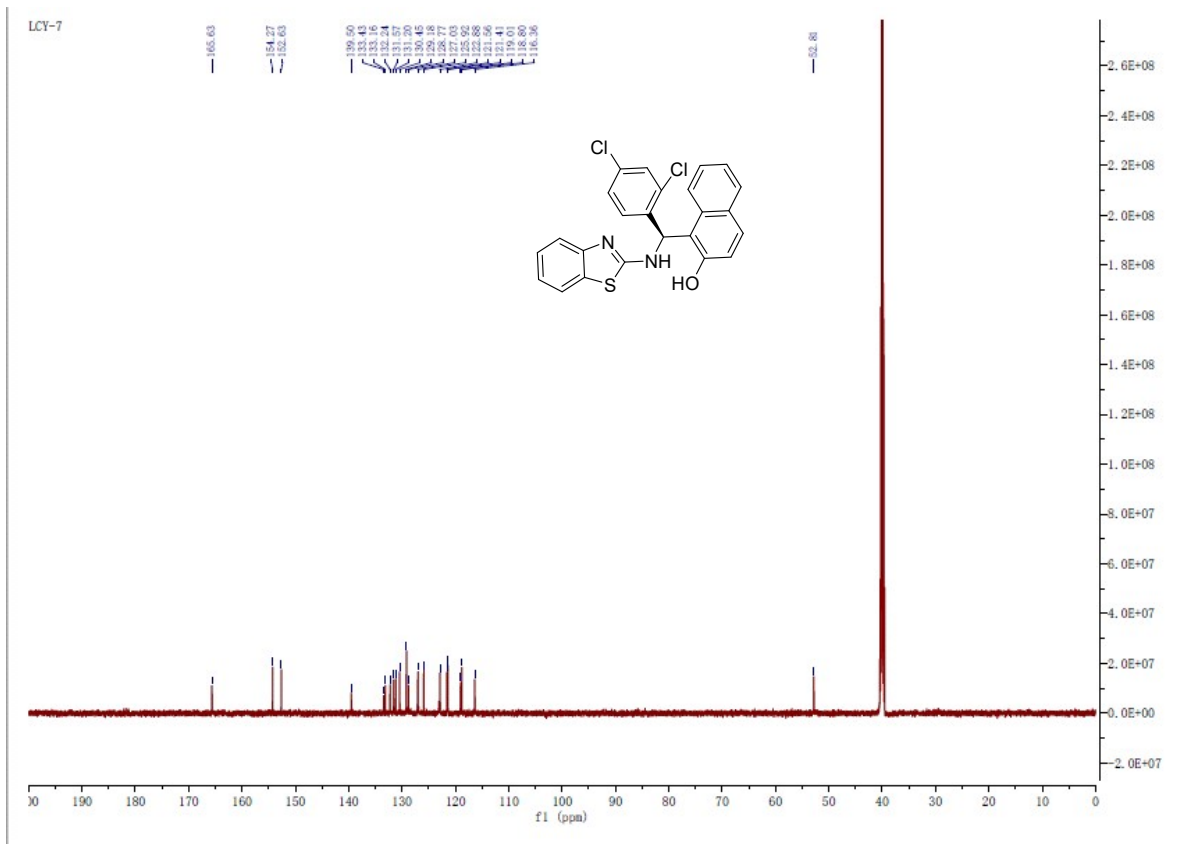

3pa

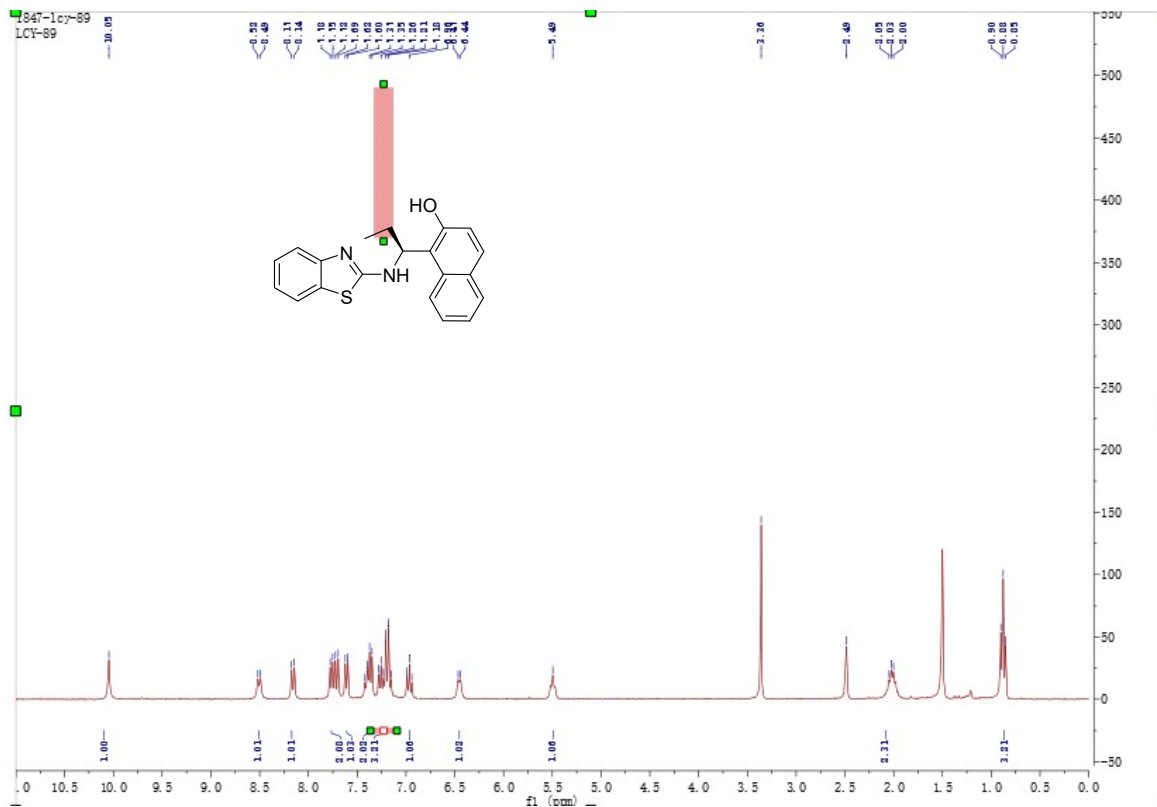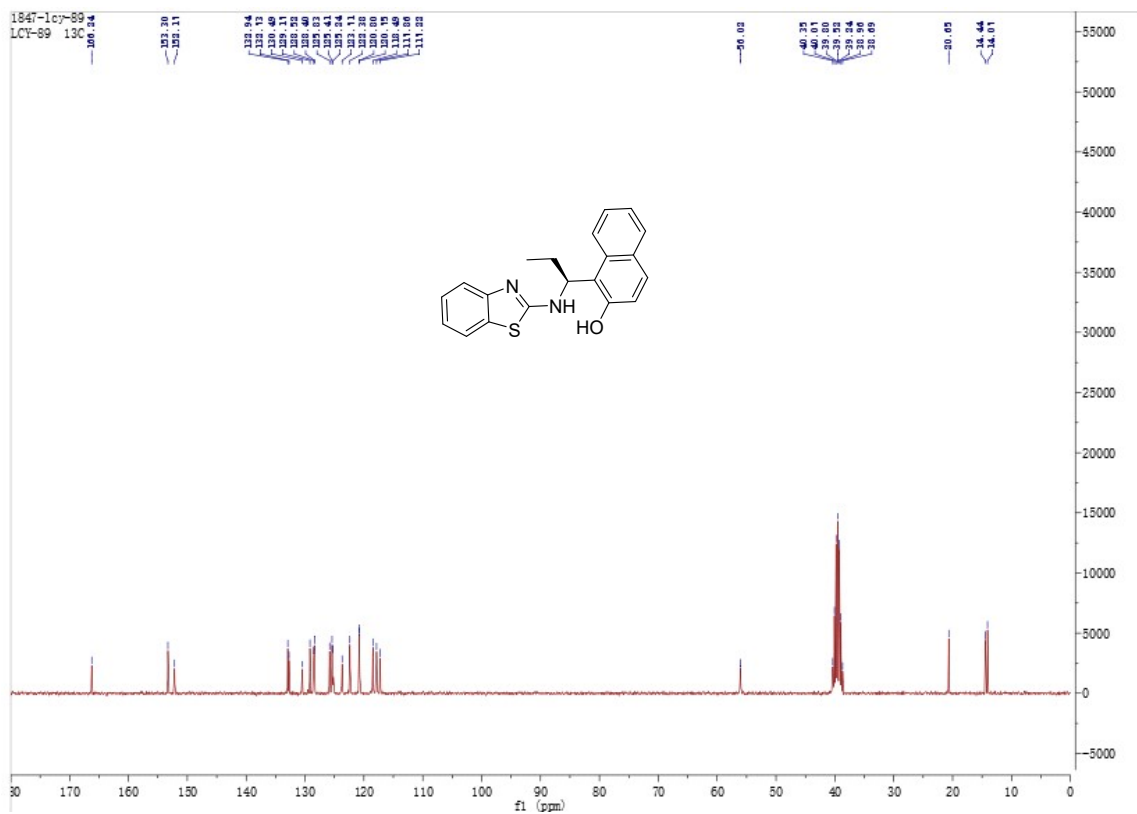

3qa

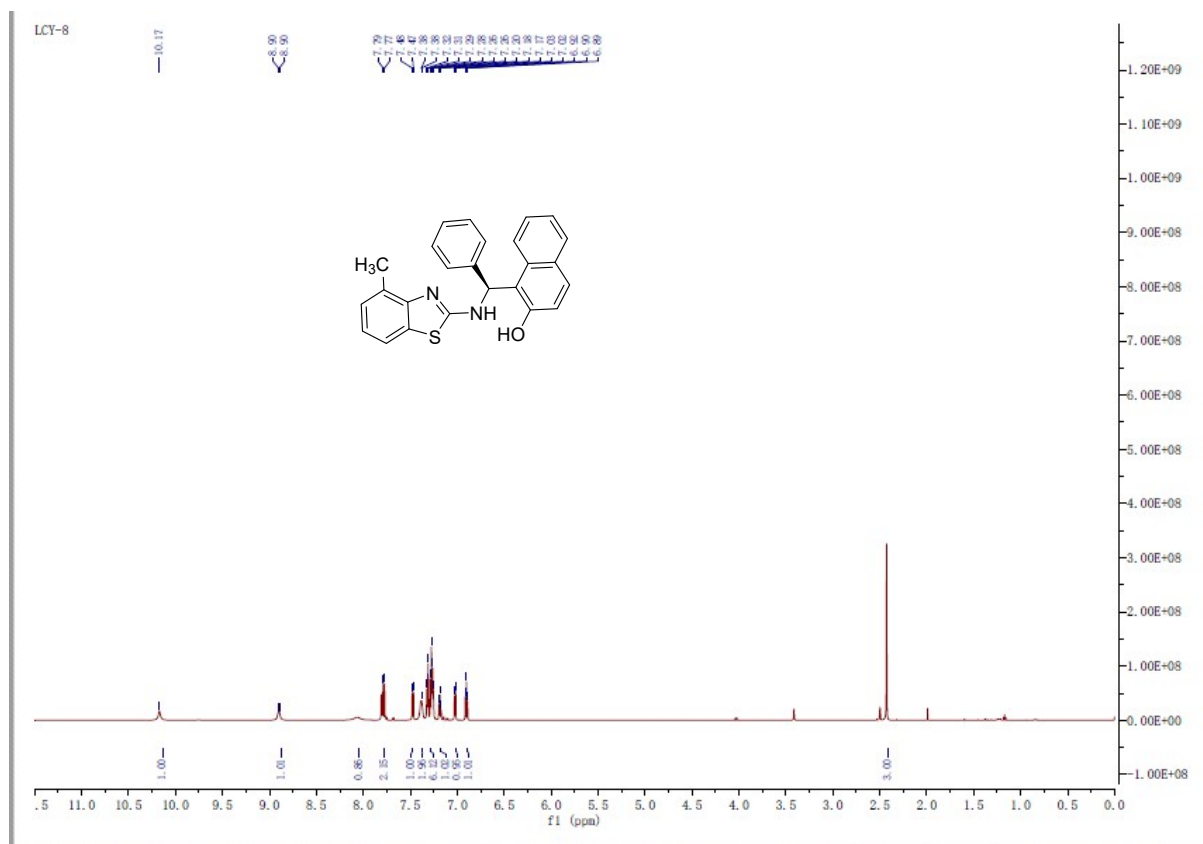

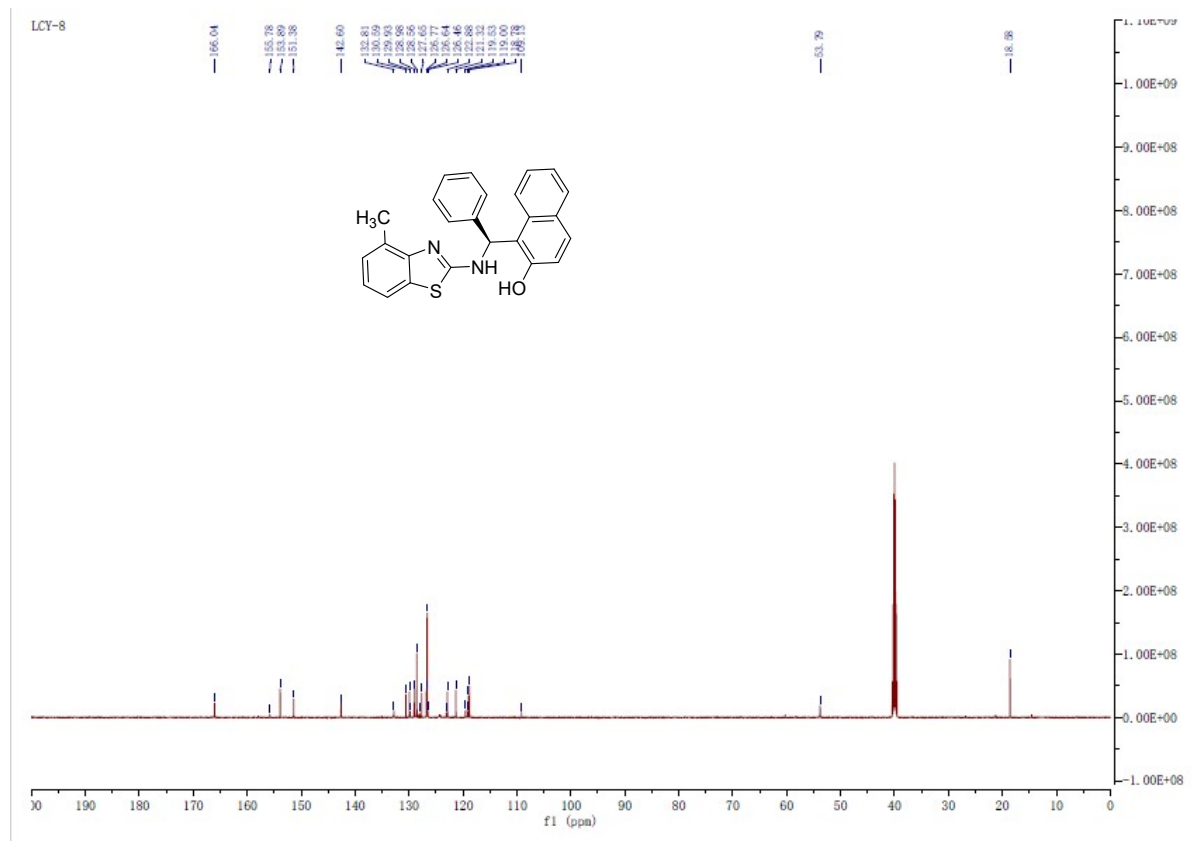

3ra

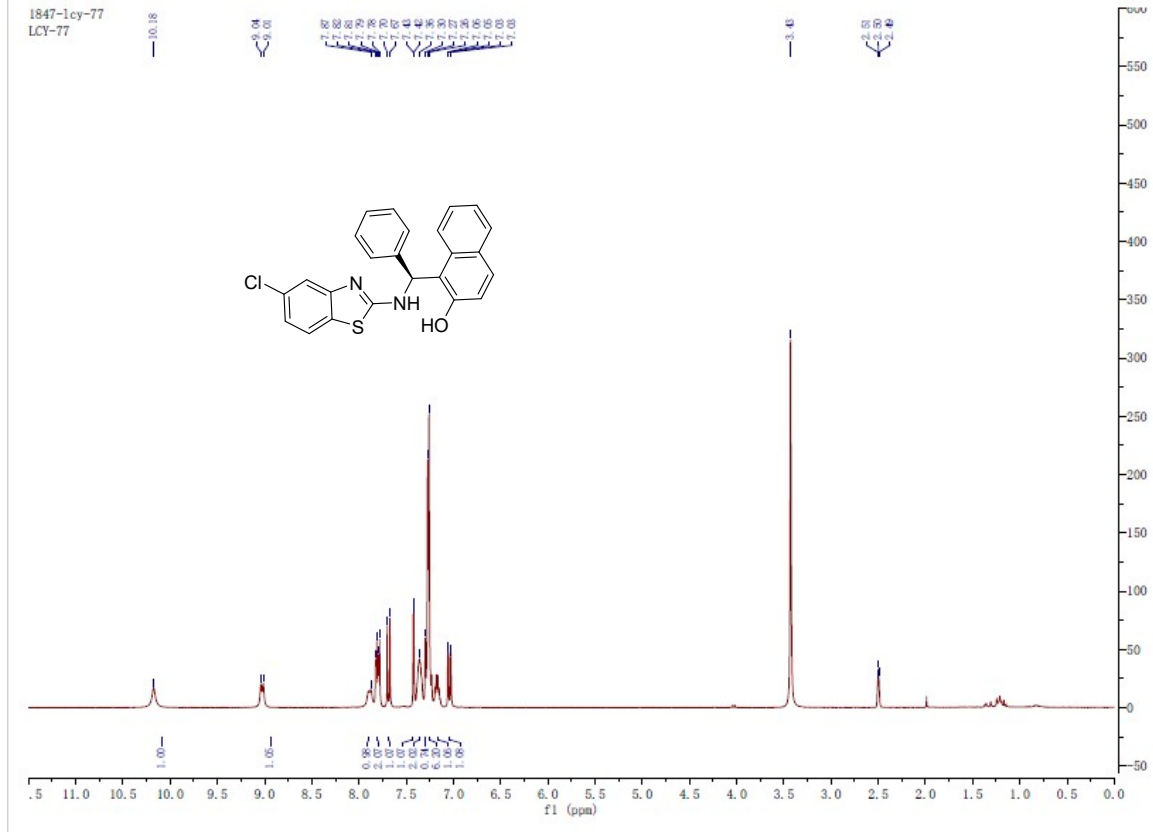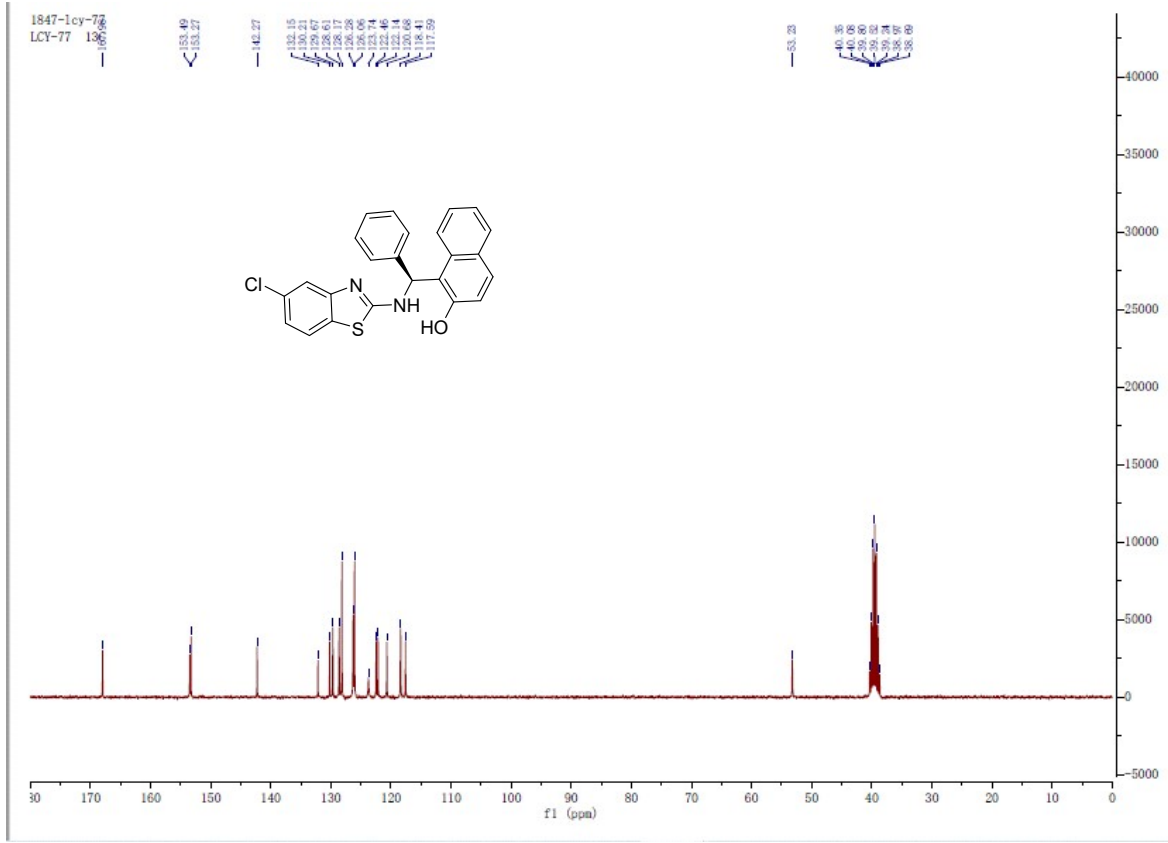

3sa

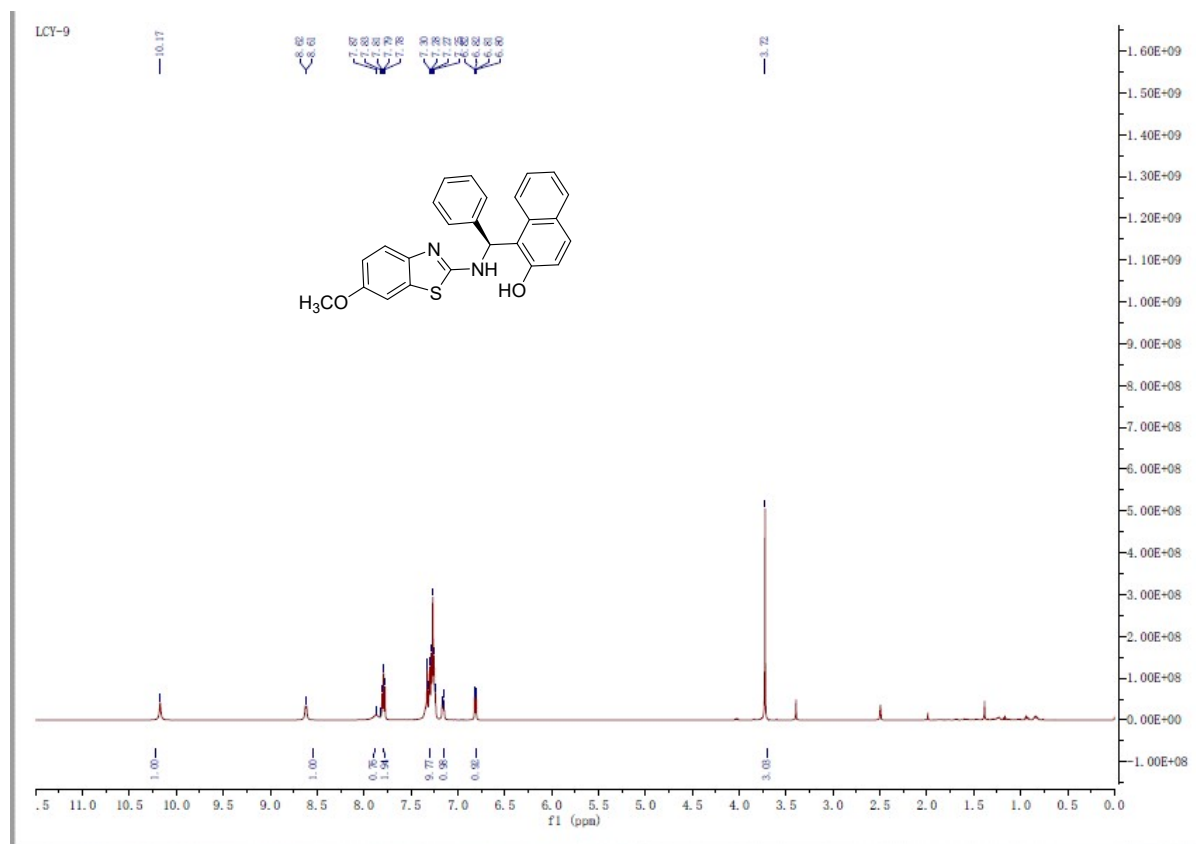

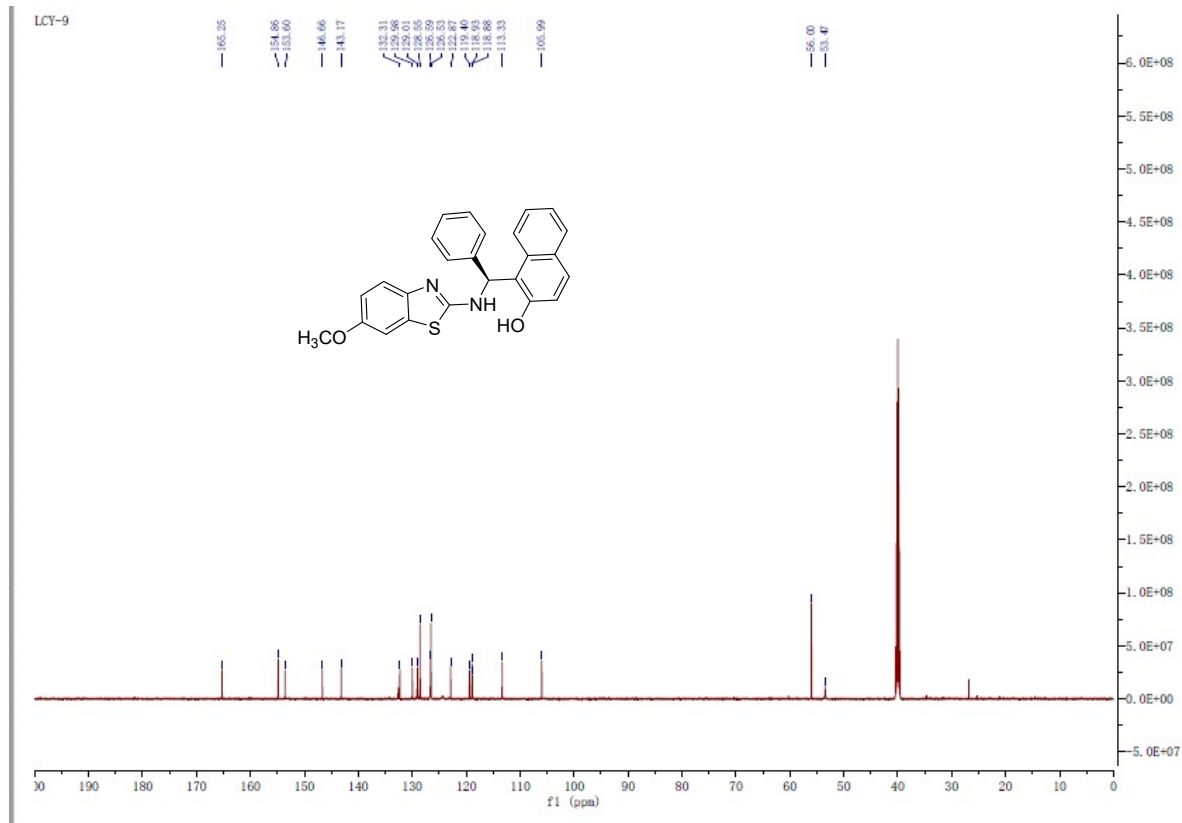

### 3ta

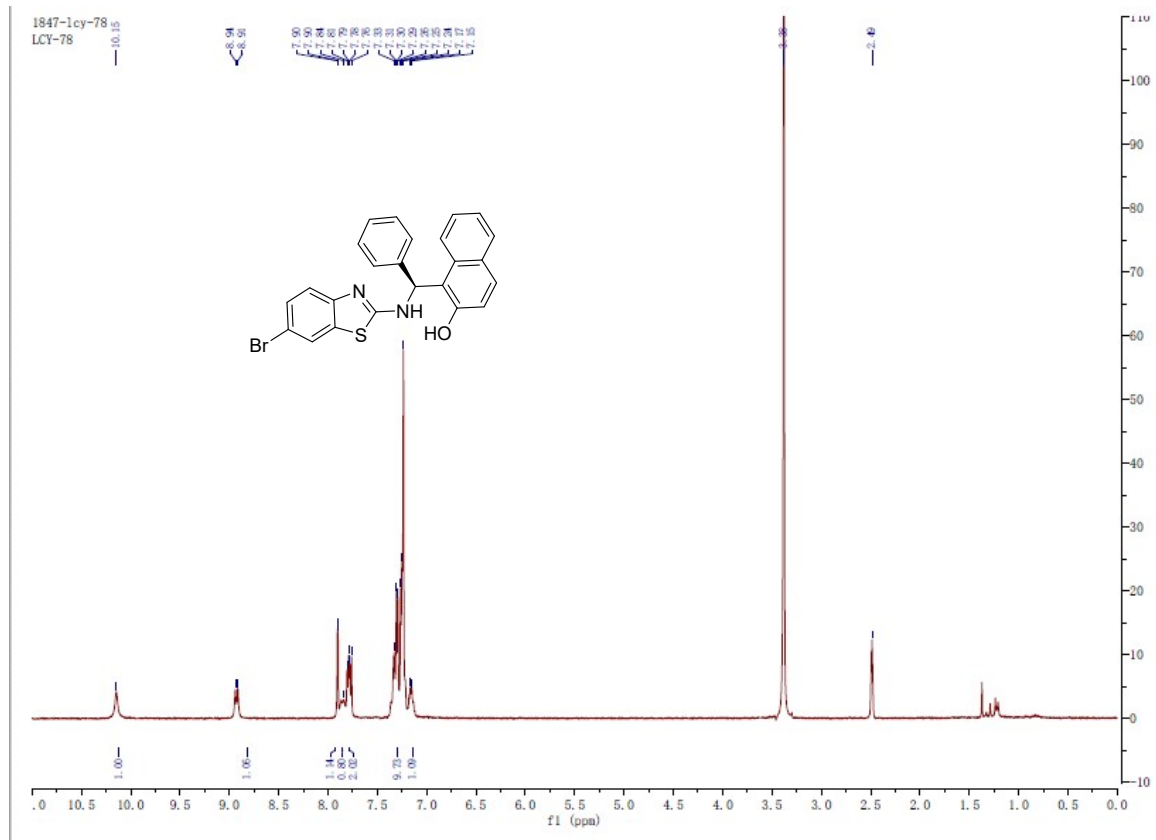



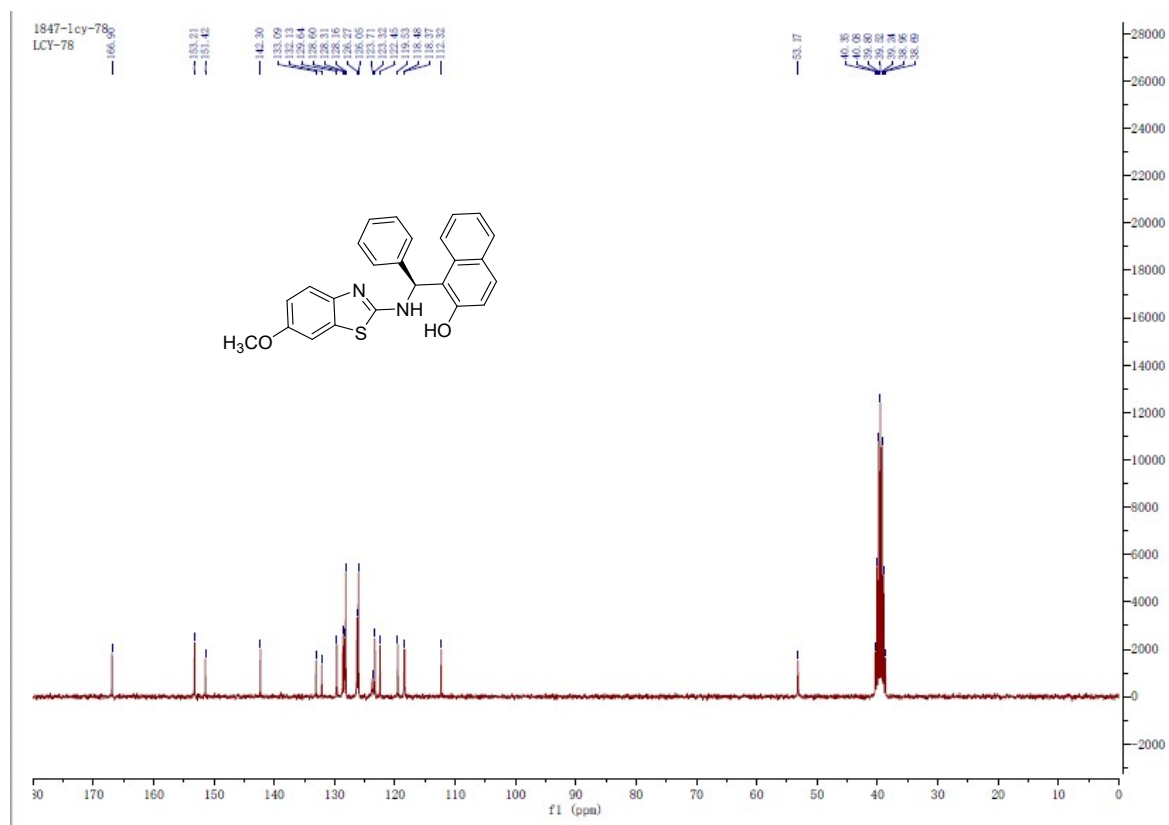

3ua







3ad

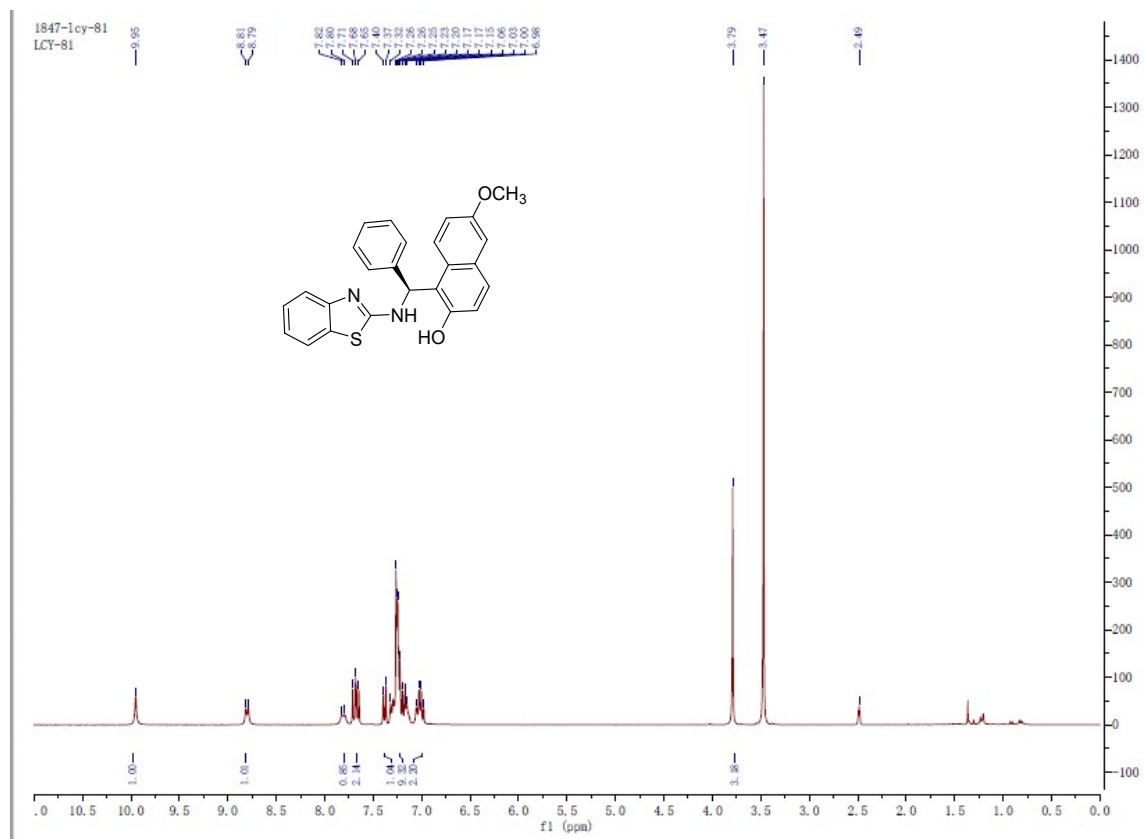

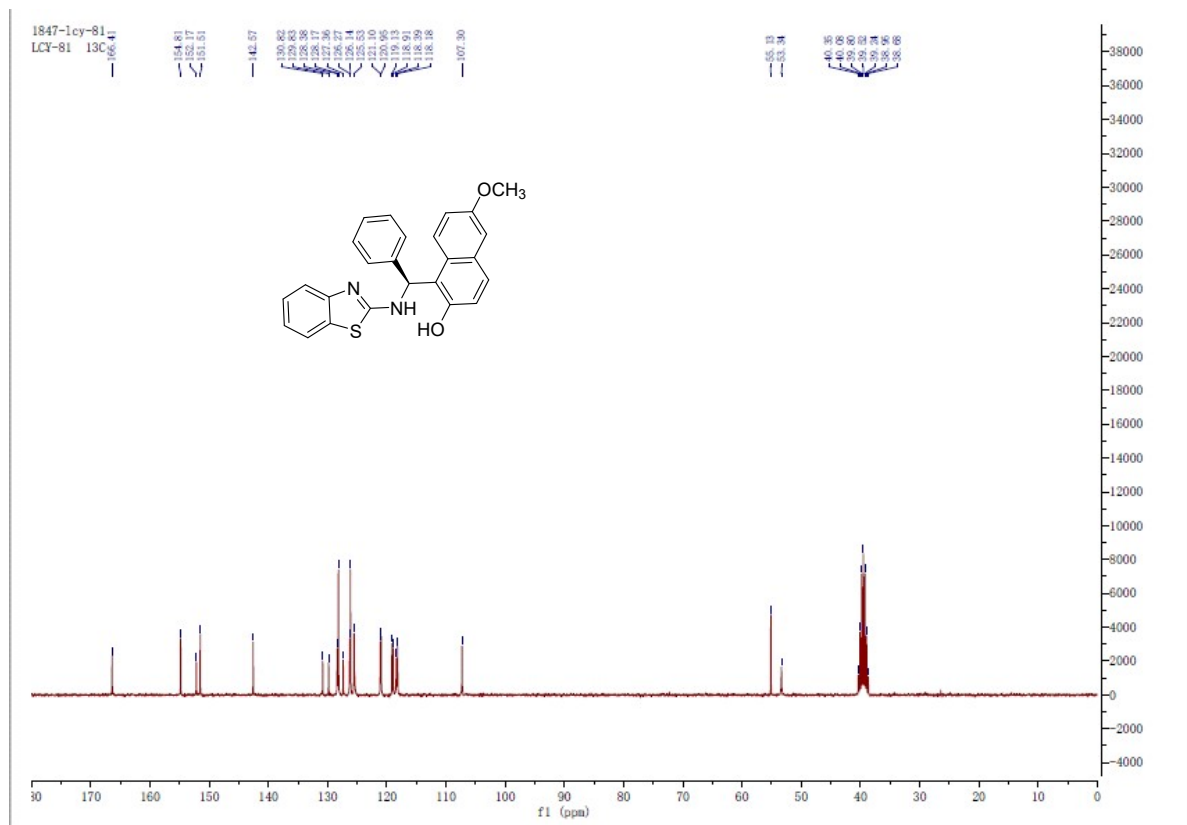

3ae

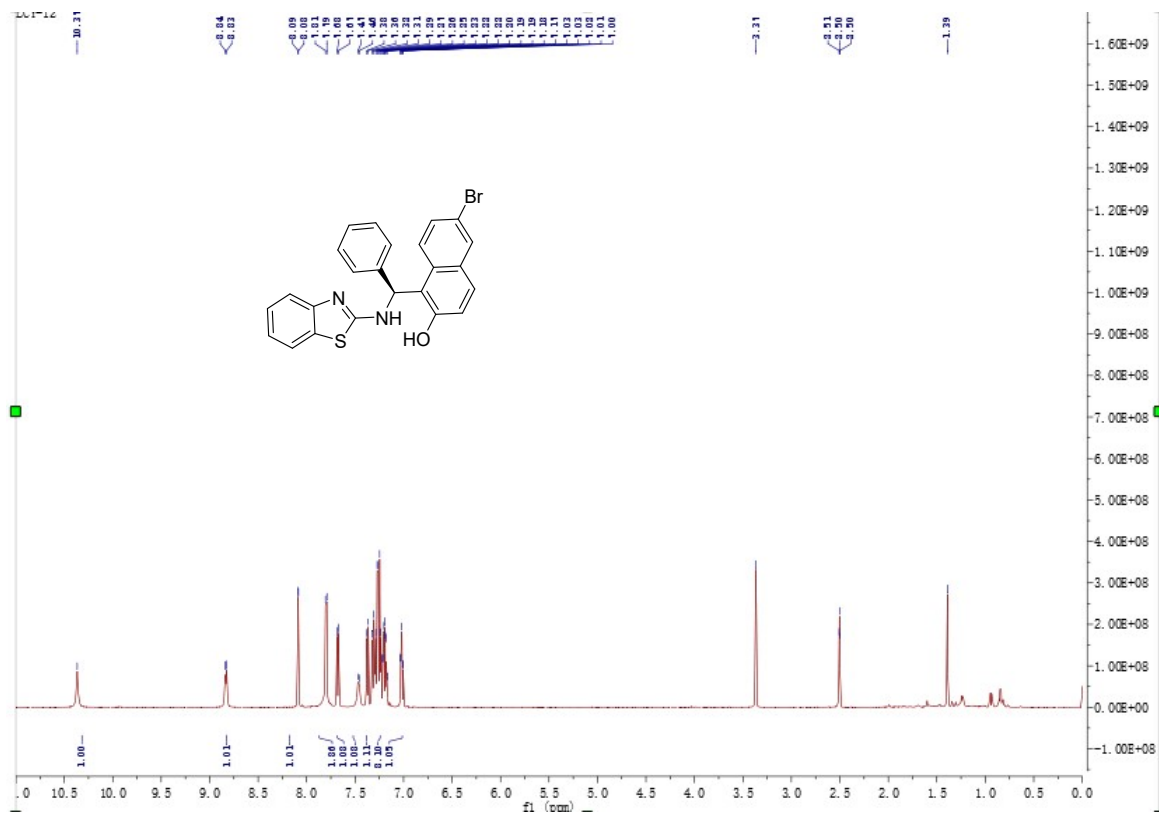

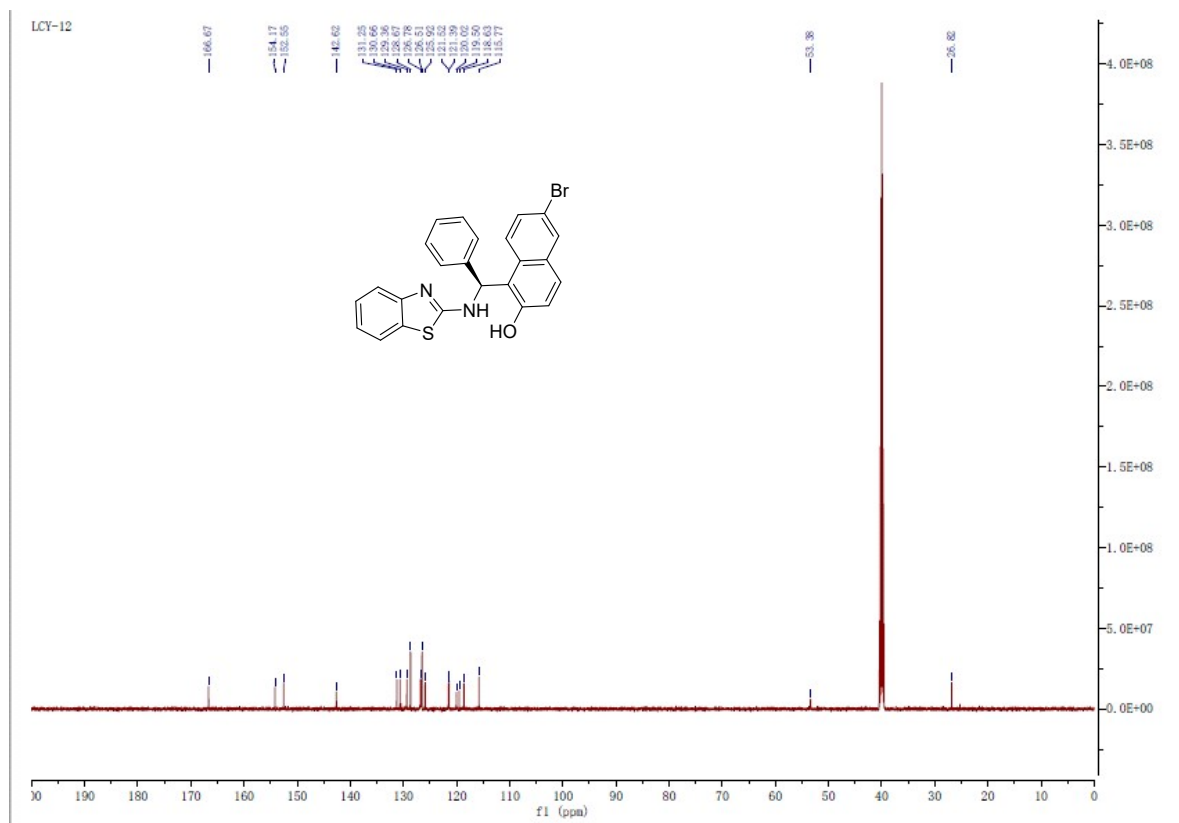

4

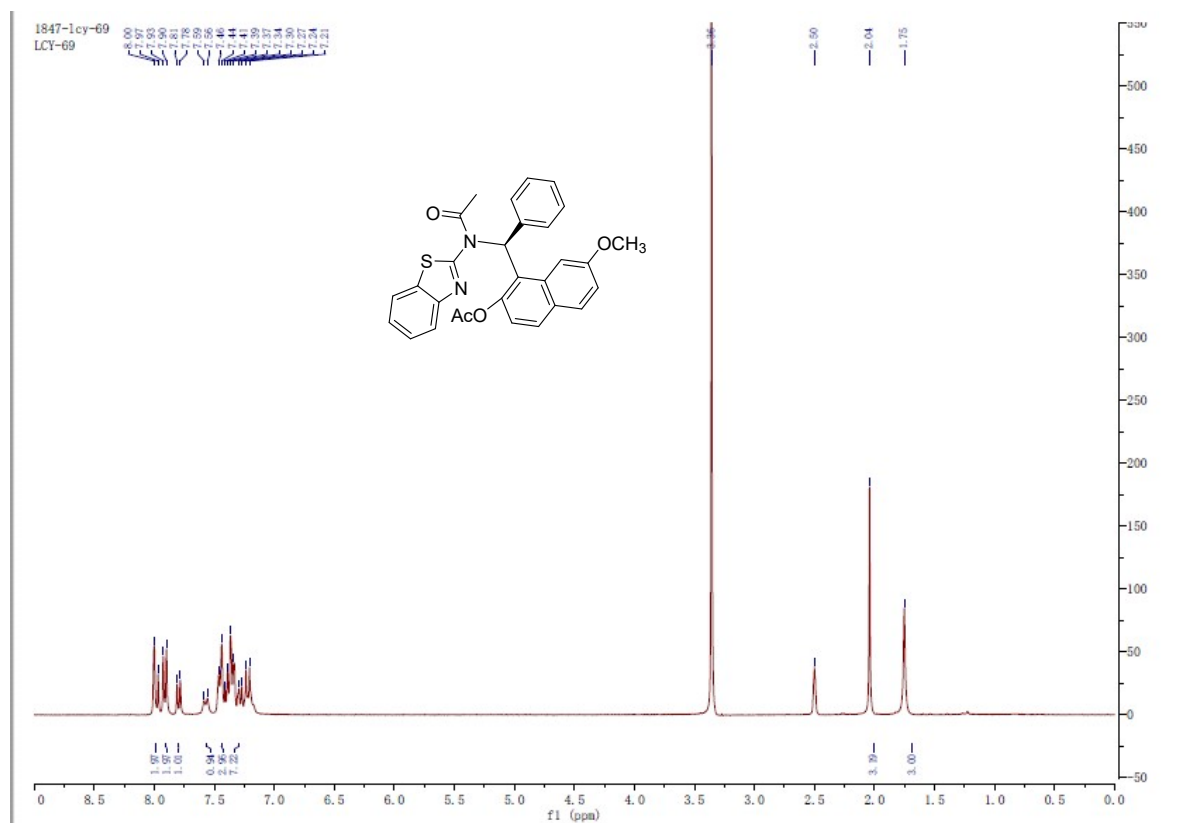

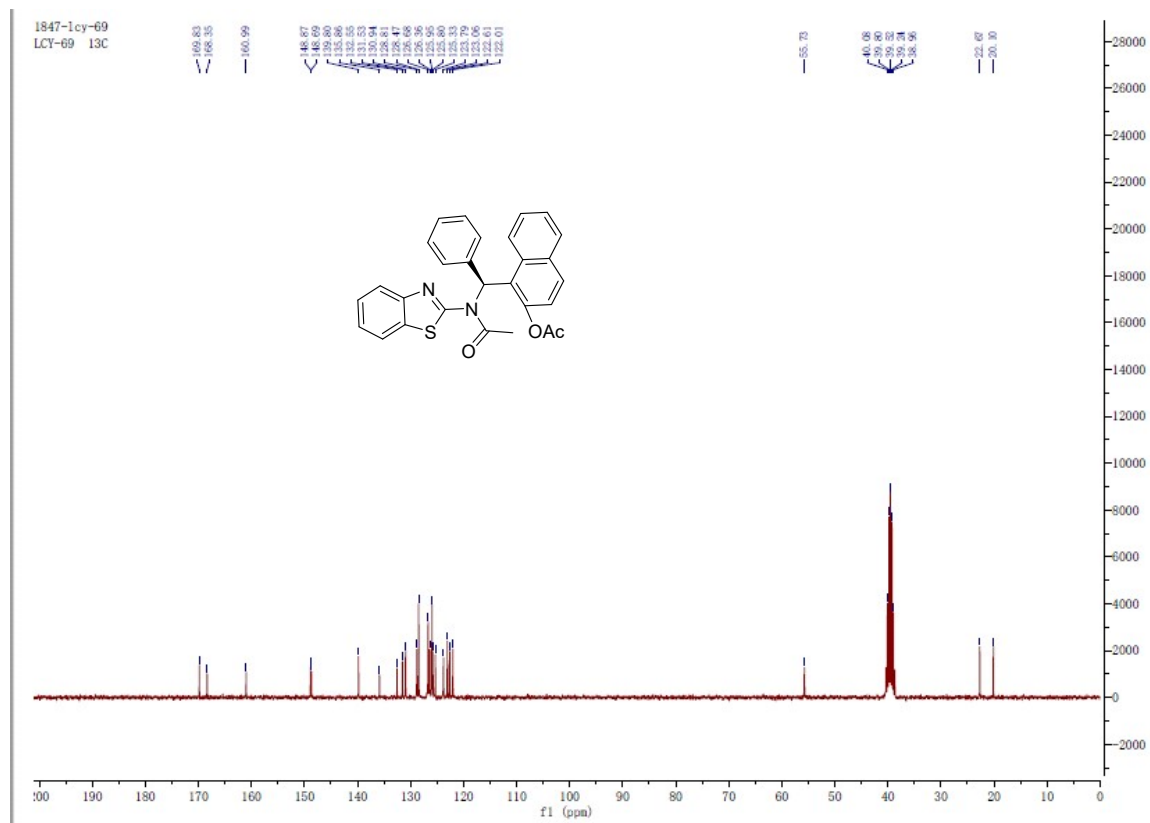

5



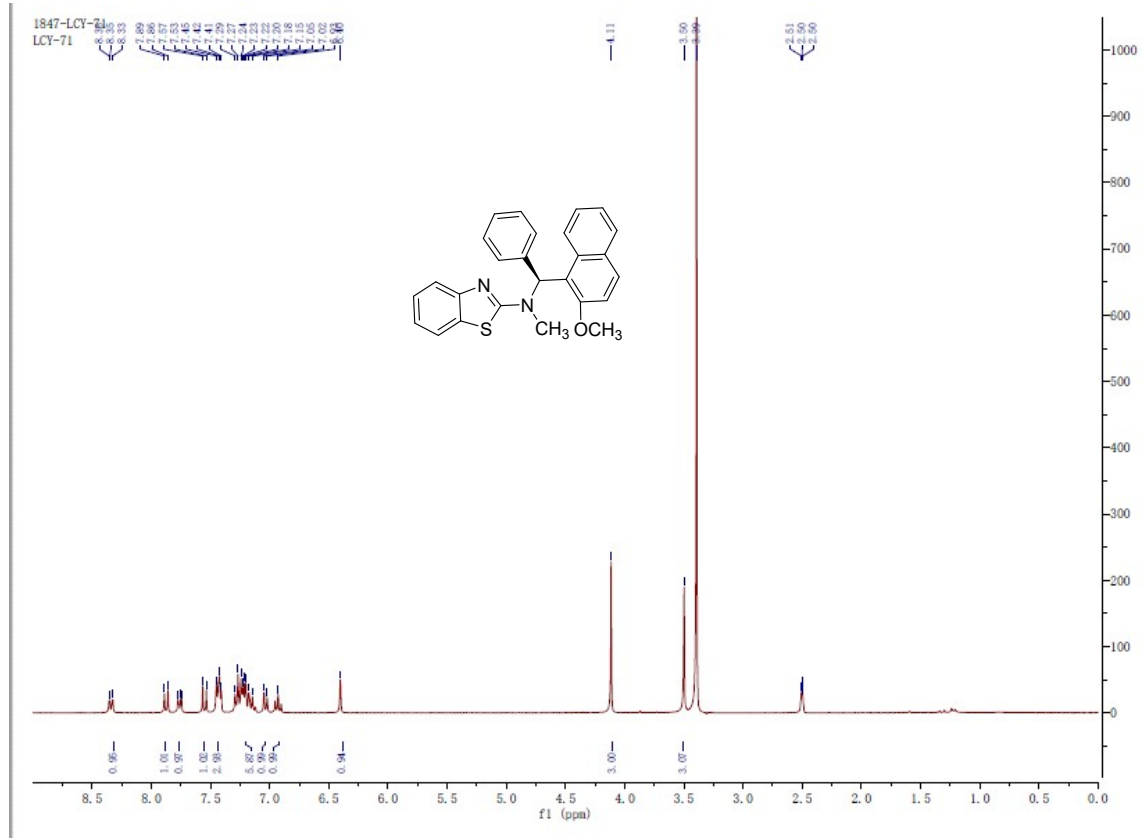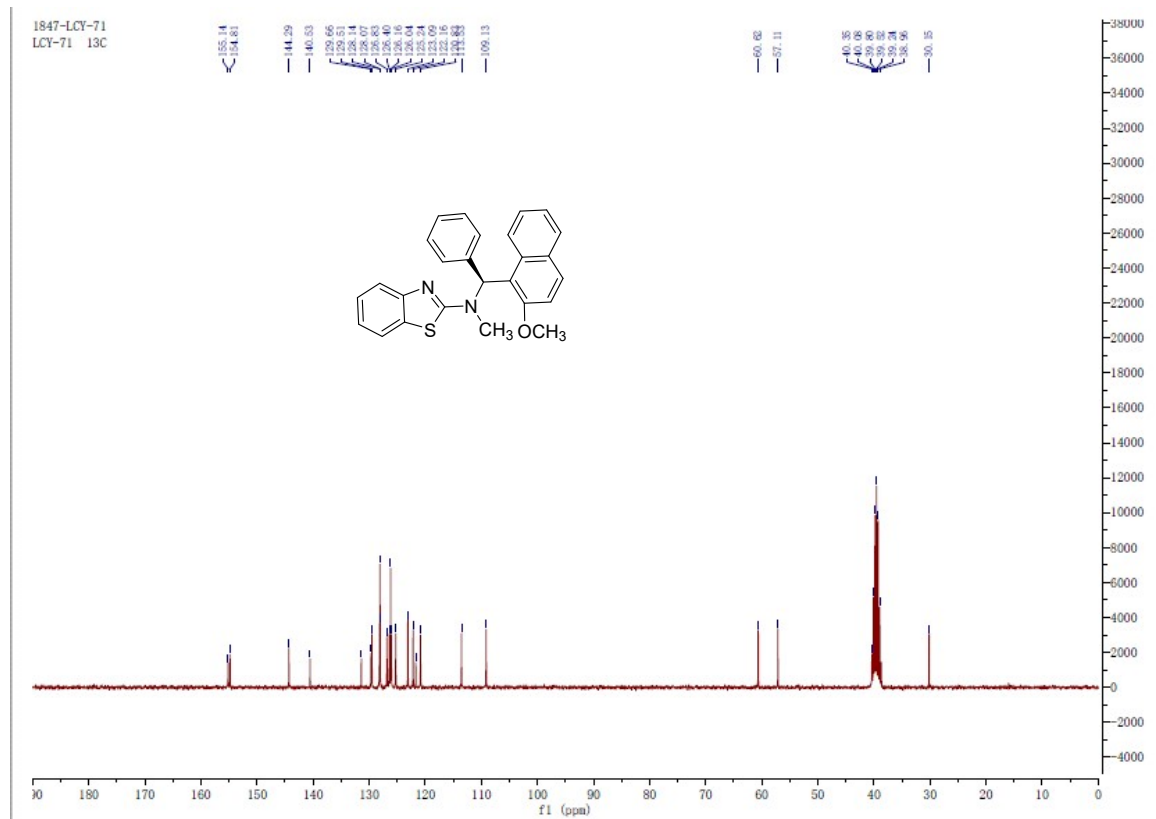

6

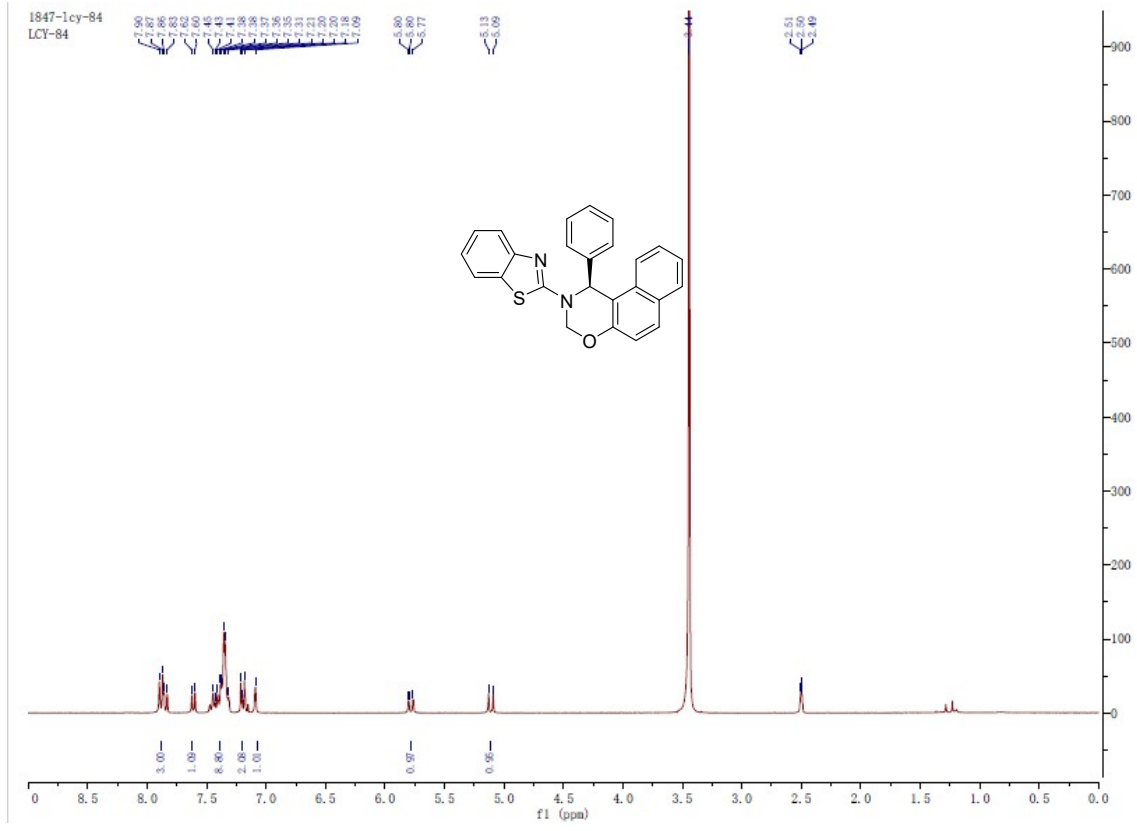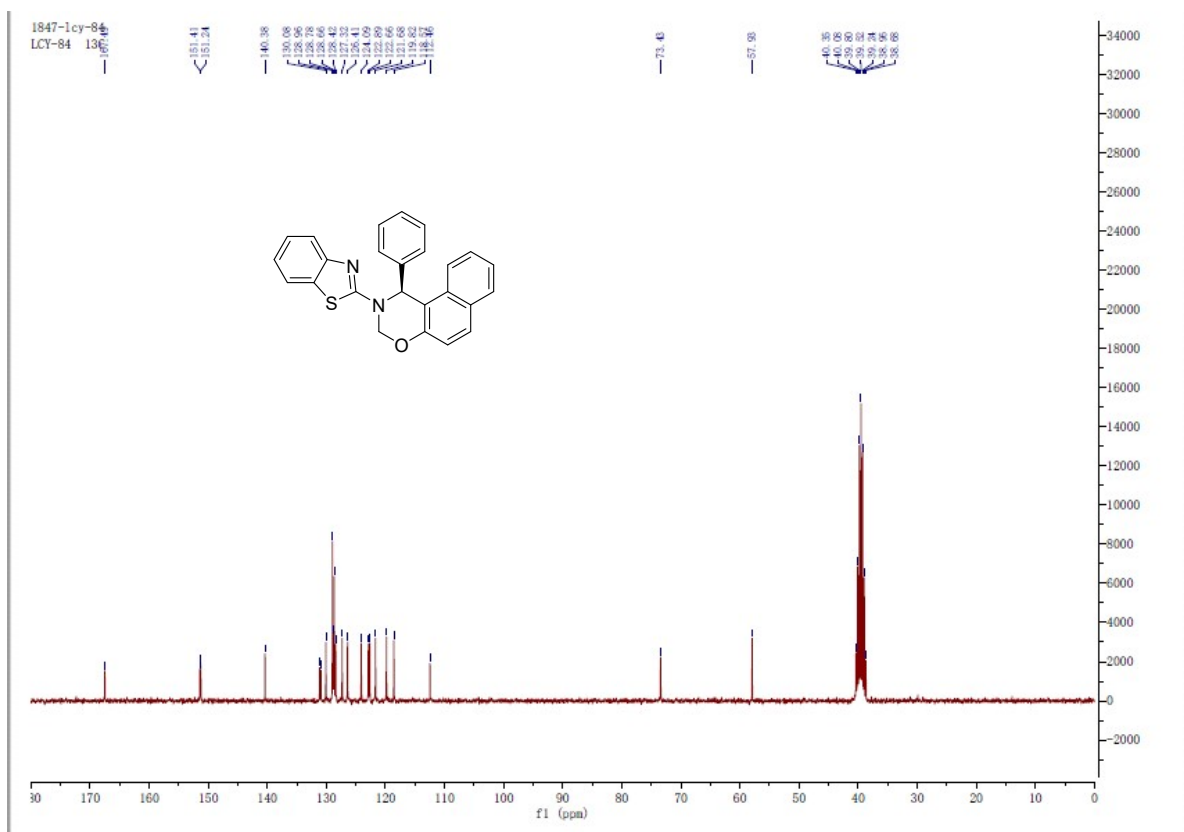

Supplement: d1ob01443a1.pdf [file d1ob01443a1.pdf]
